# Supplementary material for: Nonpharmacologic Treatments for Attention-Deficit/Hyperactivity Disorder: A Systematic Review
Source: Oxford University Press journal article supplement (doi:10.1542/peds.2018-0094), 2018-05-30
Supplement: peds_20180094supplementarydata.pdf [file peds_20180094supplementarydata.pdf]

## Supplemental Information

**SUPPLEMENTAL TABLE 1** Exact Terms for All Searches Considered in the Full AHRQ Report, PubMed Search Strategy (November 4, 2016): Key Question 1

| Set No. | Terms                                                                                                                                                                                                                                                                                                                                                                                                                                                                                                                                                                                                                                                                                                                                                                                                                                                                                                                                                                                                                                                                                                                                                                                                                                                                                                                                                                                                                                                                                                         |
|---------|---------------------------------------------------------------------------------------------------------------------------------------------------------------------------------------------------------------------------------------------------------------------------------------------------------------------------------------------------------------------------------------------------------------------------------------------------------------------------------------------------------------------------------------------------------------------------------------------------------------------------------------------------------------------------------------------------------------------------------------------------------------------------------------------------------------------------------------------------------------------------------------------------------------------------------------------------------------------------------------------------------------------------------------------------------------------------------------------------------------------------------------------------------------------------------------------------------------------------------------------------------------------------------------------------------------------------------------------------------------------------------------------------------------------------------------------------------------------------------------------------------------|
| 1       | “Attention Deficit Disorder with Hyperactivity”[Mesh] OR “attention deficit hyperactivity disorder”[tiab] OR “ADHD”[tiab] OR “attention deficit disorder”[tiab]                                                                                                                                                                                                                                                                                                                                                                                                                                                                                                                                                                                                                                                                                                                                                                                                                                                                                                                                                                                                                                                                                                                                                                                                                                                                                                                                               |
| 2       | “Pediatrics”[Mesh] OR “Adolescent”[Mesh] OR “Infant”[Mesh] OR “Child”[Mesh] OR child[tiab] OR children[tiab] OR infant[tiab] OR infants[tiab] OR preschool[tiab] OR preschooler[tiab] OR pediatric[tiab] OR teenager[tiab] OR teenagers[tiab] OR teenaged[tiab] OR teen[tiab] OR teens[tiab] OR adolescent[tiab] OR adolescents[tiab] OR adolescence[tiab] OR youth[tiab]                                                                                                                                                                                                                                                                                                                                                                                                                                                                                                                                                                                                                                                                                                                                                                                                                                                                                                                                                                                                                                                                                                                                     |
| 3       | “Attention Deficit and Disruptive Behavior Disorders/diagnosis”[Majr] OR mass screening[mesh] OR questionnaires[mesh] OR Interviews as Topic[Mesh] OR Psychometrics[Mesh] OR Psychiatric Status Rating Scales[Mesh] OR diagnosis[mesh:noexp] OR “Diagnostic Techniques and Procedures”[Mesh] OR “Diagnostic and Statistical Manual of Mental Disorders”[Mesh] OR “Referral and Consultation”[Mesh] OR questionnaire[tiab] OR questionnaires[tiab] OR screening[tiab] OR screen[tiab] OR scale[tiab] OR instrument[tiab] OR instruments[tiab] OR interview[tiab] OR interviews[tiab] OR DSM*[tiab] OR diagnosis[tiab] OR diagnostic[tiab] OR diagnosed[tiab] OR (Vanderbilt[tiab] AND scale[tiab]) OR conners[tiab] OR cprs[tiab] OR ctrs[tiab] OR cprs[tiab] OR crs[tiab] OR “snap-IV”[tiab] OR “snap-4”[tiab] OR “basc-2”[tiab] OR “behavioral assessment system for children”[tiab] OR dbdrs[tiab] OR “disruptive behavior disorder rating scale”[tiab] OR adhd-rs[tiab] OR “adhd rating scale”[tiab] OR ksads[tiab] OR k-sads[tiab] OR kiddie-sads[tiab] OR DISC[tiab] OR “dominance inducement submission and compliance”[tiab] OR “diagnostic interview schedule for children”[tiab] OR “diagnostic inventory for screening children”[tiab] OR “mini-kid”[tiab] OR “Mini Interational Neuropsychiatric interview”[tiab] OR “iva-2”[tiab] OR “iva-qs”[tiab] OR “iva-ae2”[tiab] OR tova[tiab] OR “test of variables of attention”[tiab] OR “neuropsychiatric eeg-based assessment aid”[tiab] OR neba[tiab] |
| 4       | “Sensitivity and Specificity”[Mesh] OR “Diagnostic Errors”[Mesh] OR sensitivity[tiab] OR specificity[tiab] OR accuracy[tiab] OR accurate[tiab] OR accurately[tiab] OR misdiagnos*[tiab] OR (randomized controlled trial[pt] OR controlled clinical trial[pt] OR randomized[tiab] OR randomized[tiab] OR randomization[tiab] OR randomization[tiab] OR placebo[tiab] OR randomly[tiab] OR trial[tiab] OR groups[tiab] OR Clinical trial[pt] OR “clinical trial”[tiab] OR “clinical trials”[tiab] OR “evaluation studies”[pt] OR “evaluation studies as topic”[MeSH] OR “evaluation study”[tiab] OR evaluation studies[tiab] OR “intervention studies”[MeSH] OR “intervention study”[tiab] OR “intervention studies”[tiab] OR “case-control studies”[MeSH] OR “case-control”[tiab] OR “cohort studies”[MeSH] OR cohort[tiab] OR “longitudinal studies”[MeSH] OR “longitudinal”[tiab] OR longitudinally[tiab] OR “prospective”[tiab] OR prospectively[tiab] OR “retrospective studies”[MeSH] OR “retrospective”[tiab] OR “Cross-Sectional Studies”[Mesh] OR cross-sectional[tiab] OR “comparative study”[pt] OR “comparative study”[tiab] OR systematic[sb] OR “meta-analysis”[pt] OR “meta-analysis as topic”[MeSH] OR “meta-analysis”[tiab] OR “meta-analyses”[tiab] NOT (Editorial[ptyp] OR Letter[pt] OR Case Reports[pt] OR Comment[pt]) NOT (animals[mh] NOT humans[mh]) AND English[la]                                                                                                                   |
| 5       | #1 AND #2 AND #3 AND #4<br>Publication date from January 1, 2009                                                                                                                                                                                                                                                                                                                                                                                                                                                                                                                                                                                                                                                                                                                                                                                                                                                                                                                                                                                                                                                                                                                                                                                                                                                                                                                                                                                                                                              |

**SUPPLEMENTAL TABLE 2** Exact Terms for All Searches Considered in the Full AHRQ Report, PubMed Search Strategy (November 4, 2016): Key Question 2

| Set No. | Terms                                                                                                                                                                                                                                                                                                                                                                                                                                                                                                                                                                                                                                                                                                                                                                                                                                                                                                                                                                                                                                                                                                                                                                                                                                                                                                                                                                                                                                                                                                                                                                                                                                                                                                                                                                                                                                                                                                                                                                                                                                                                                                                                                                                                                                                                                                                                                                                                                                                                                                                                                                                                                                                                                                                                                                                                                                                                                                                                                                                                                                                                                                                                                                                                                                                                                                                                                                                                                                                                                                                                                                                                                                                                                                                                                                                                         |
|---------|---------------------------------------------------------------------------------------------------------------------------------------------------------------------------------------------------------------------------------------------------------------------------------------------------------------------------------------------------------------------------------------------------------------------------------------------------------------------------------------------------------------------------------------------------------------------------------------------------------------------------------------------------------------------------------------------------------------------------------------------------------------------------------------------------------------------------------------------------------------------------------------------------------------------------------------------------------------------------------------------------------------------------------------------------------------------------------------------------------------------------------------------------------------------------------------------------------------------------------------------------------------------------------------------------------------------------------------------------------------------------------------------------------------------------------------------------------------------------------------------------------------------------------------------------------------------------------------------------------------------------------------------------------------------------------------------------------------------------------------------------------------------------------------------------------------------------------------------------------------------------------------------------------------------------------------------------------------------------------------------------------------------------------------------------------------------------------------------------------------------------------------------------------------------------------------------------------------------------------------------------------------------------------------------------------------------------------------------------------------------------------------------------------------------------------------------------------------------------------------------------------------------------------------------------------------------------------------------------------------------------------------------------------------------------------------------------------------------------------------------------------------------------------------------------------------------------------------------------------------------------------------------------------------------------------------------------------------------------------------------------------------------------------------------------------------------------------------------------------------------------------------------------------------------------------------------------------------------------------------------------------------------------------------------------------------------------------------------------------------------------------------------------------------------------------------------------------------------------------------------------------------------------------------------------------------------------------------------------------------------------------------------------------------------------------------------------------------------------------------------------------------------------------------------------------------|
| 1       | “Attention Deficit Disorder with Hyperactivity”[Mesh] OR “attention deficit hyperactivity disorder”[tiab] OR “ADHD”[tiab] OR “attention deficit disorder”[tiab]                                                                                                                                                                                                                                                                                                                                                                                                                                                                                                                                                                                                                                                                                                                                                                                                                                                                                                                                                                                                                                                                                                                                                                                                                                                                                                                                                                                                                                                                                                                                                                                                                                                                                                                                                                                                                                                                                                                                                                                                                                                                                                                                                                                                                                                                                                                                                                                                                                                                                                                                                                                                                                                                                                                                                                                                                                                                                                                                                                                                                                                                                                                                                                                                                                                                                                                                                                                                                                                                                                                                                                                                                                               |
| 2       | “Pediatrics”[Mesh] OR “Adolescent”[Mesh] OR “Infant”[Mesh] OR “Child”[Mesh] OR child[tiab] OR children[tiab] OR infant[tiab] OR infants[tiab] OR preschool[tiab] OR preschooler[tiab] OR pediatric[tiab] OR teenager[tiab] OR teenagers[tiab] OR teenaged[tiab] OR teen[tiab] OR teens[tiab] OR adolescent[tiab] OR adolescents[tiab] OR adolescence[tiab] OR youth[tiab]                                                                                                                                                                                                                                                                                                                                                                                                                                                                                                                                                                                                                                                                                                                                                                                                                                                                                                                                                                                                                                                                                                                                                                                                                                                                                                                                                                                                                                                                                                                                                                                                                                                                                                                                                                                                                                                                                                                                                                                                                                                                                                                                                                                                                                                                                                                                                                                                                                                                                                                                                                                                                                                                                                                                                                                                                                                                                                                                                                                                                                                                                                                                                                                                                                                                                                                                                                                                                                     |
| 3       | #1 AND #2                                                                                                                                                                                                                                                                                                                                                                                                                                                                                                                                                                                                                                                                                                                                                                                                                                                                                                                                                                                                                                                                                                                                                                                                                                                                                                                                                                                                                                                                                                                                                                                                                                                                                                                                                                                                                                                                                                                                                                                                                                                                                                                                                                                                                                                                                                                                                                                                                                                                                                                                                                                                                                                                                                                                                                                                                                                                                                                                                                                                                                                                                                                                                                                                                                                                                                                                                                                                                                                                                                                                                                                                                                                                                                                                                                                                     |
| 4       | “Attention Deficit Disorder with Hyperactivity/drug therapy”[Majr] OR “Central Nervous System Stimulants”[MeSH] OR “Methylphenidate”[MeSH] OR “Dexmethylphenidate”[MeSH] OR “Dextroamphetamine”[MeSH] OR “Adderall”[Supplementary Concept] OR “lisdexamfetamine dimesylate”[Supplementary Concept] OR “Amphetamine”[MeSH] OR “Guanfacine”[MeSH] OR “Sympatholytics”[MeSH] OR “Clonidine”[MeSH] OR “Adrenergic Uptake Inhibitors”[MeSH] OR “Adrenergic Uptake Inhibitors”[Pharmacological Action] OR “Receptors, Adrenergic, alpha-2”[MeSH] OR “Adrenergic alpha-Agonists”[Mesh] OR “Adrenergic alpha-2 Receptor Agonists”[Mesh] OR “atomoxetine”[Supplementary Concept] OR “Antidepressive Agents, Tricyclic”[MeSH] OR “Desipramine”[MeSH] OR “Dopamine Uptake Inhibitors”[MeSH] OR “Sympathomimetics”[MeSH] OR “modafinil”[Supplementary Concept] OR “Serotonin Uptake Inhibitors”[MeSH] OR “Serotonin Uptake Inhibitors”[Pharmacological Action] OR “duloxetine” [Supplementary Concept] OR “Monoamine Oxidase Inhibitors”[MeSH] OR “Monoamine Oxidase”[MeSH] OR “Selegiline”[MeSH] OR “Bupropion”[MeSH] OR “armodafinil” [Supplementary Concept] OR “venlafaxine”[Supplementary Concept] OR “Receptors, N-Methyl-D-Aspartate”[MeSH] OR “Memantine”[MeSH] OR “Amantadine”[MeSH] OR “duloxetine”[Supplementary Concept] OR “Central Nervous System Stimulants” [Pharmacological Action] OR “Adrenergic alpha-2 Receptor Agonists” [Pharmacological Action] OR “Antidepressive Agents, Tricyclic” [Pharmacological Action] OR “Dopamine Uptake Inhibitors” [Pharmacological Action] OR “Monoamine Oxidase Inhibitors” [Pharmacological Action] OR “Central Nervous System Stimulants”[tiab] OR “psychostimulant”[tiab] OR “Methylphenidate”[tiab] OR “Methylphenidate Hydrochloride”[tiab] OR “Aptensio”[tiab] OR “Concerta”[tiab] OR “Ritalin”[tiab] OR “Ritalin LA”[tiab] OR “Medikinet”[tiab] OR “Equasym”[tiab] OR “Quillivant”[tiab] OR “Metadate”[tiab] OR “Daytrana”[tiab] OR “Dexmethylphenidate”[tiab] OR “Dexmethylphenidate Hydrochloride”[tiab] OR “Focalin”[tiab] OR “Dextroamphetamine”[tiab] OR “Dexedrine”[tiab] OR “Dextrostat”[tiab] OR “ProCentra”[tiab] OR “Zenedi”[tiab] OR “mixed amphetamine salts”[tiab] OR “Adderall” [tiab] OR “lisdexamfetamine”[tiab] OR “lisdexamfetamine dimesylate”[tiab] OR “Vyvanse”[tiab] OR “Venvanse”[tiab] OR “Elvanse”[tiab] OR “Tyvense”[tiab] OR “Dyanavel”[tiab] OR “Evekeo”[tiab] OR “Guanfacine”[tiab] OR “Sympatholytics”[tiab] OR “Central alpha-2 Adrenergic Agonist”[tiab] OR “Clonidine”[tiab] OR “Intuniv”[tiab] OR “Estulic”[tiab] OR “Tenex”[tiab] OR “Catapres”[tiab] OR “Clophelin”[tiab] OR “Kapvay”[tiab] OR “Nexiclon”[tiab] OR “Duraclon”[tiab] OR “Norepinephrine Reuptake Inhibitors”[tiab] OR “Selective Norepinephrine Reuptake Inhibitors”[tiab] OR “Adrenergic Uptake Inhibitors”[tiab] OR “atomoxetine”[tiab] OR “Strattera”[tiab] OR “Tricyclic antidepressants”[tiab] OR “Desipramine”[tiab] OR “Norpramin”[tiab] OR “Nortriptyline”[tiab] OR “Pamelor”[tiab] OR “Dopamine Reuptake Inhibitors”[tiab] OR “modafinil”[tiab] OR “Provigil”[tiab] OR “Armodafinil”[tiab] OR “Norepinephrine-dopamine Reuptake Inhibitors”[tiab] OR “Bupropion”[tiab] OR “Wellbutrin”[tiab] OR “Forfivo”[tiab] OR “Cymbalta”[tiab] OR “venlafaxine”[tiab] OR “reboxetine”[tiab] OR “Monoamine Oxidase Type B inhibitors”[tiab] OR “Selegiline”[tiab] OR “Eldepryl”[tiab] OR “Zelapar”[tiab] OR “NMDA receptors”[tiab] OR “N-Methyl-D-aspartate receptor Antagonists”[tiab] OR “Amantadine”[tiab] OR “Memantine”[tiab] OR “Pertofrane”[tiab] OR “Nuvigil”[tiab] OR “Cymbalta”[tiab] OR “duloxetine”[tiab] OR “Effexor”[tiab] OR “Eldepryl”[tiab] OR “Emsam”[tiab] OR “Trevilor”[tiab] OR “Symmetrel”[tiab] OR “Namenda”[tiab] OR “Zelapar”[tiab] |

TABLE 2 Continued

| Set No. | Terms                                                                                                                                                                                                                                                                                                                                                                                                                                                                                                                                                                                                                                                                                                                                                                                                                                                                                                                                                                                                                                                                                                                                                                                                                                                                                                                                                                                                                                                                                                                                                                                                                                                                                                                                                                                                                                                                                                                                                                                                                                                                                                                                                                                                                                                                                                                                                                                                                                                                                                                                                                                                                                                                                                                                                                                                                                                                                                                                                                                                                                                                                                                                                                                                                                                                                                                                                                                                                                                                                                                                                                                                                                                                                                                                                                                                                                                 |
|---------|-------------------------------------------------------------------------------------------------------------------------------------------------------------------------------------------------------------------------------------------------------------------------------------------------------------------------------------------------------------------------------------------------------------------------------------------------------------------------------------------------------------------------------------------------------------------------------------------------------------------------------------------------------------------------------------------------------------------------------------------------------------------------------------------------------------------------------------------------------------------------------------------------------------------------------------------------------------------------------------------------------------------------------------------------------------------------------------------------------------------------------------------------------------------------------------------------------------------------------------------------------------------------------------------------------------------------------------------------------------------------------------------------------------------------------------------------------------------------------------------------------------------------------------------------------------------------------------------------------------------------------------------------------------------------------------------------------------------------------------------------------------------------------------------------------------------------------------------------------------------------------------------------------------------------------------------------------------------------------------------------------------------------------------------------------------------------------------------------------------------------------------------------------------------------------------------------------------------------------------------------------------------------------------------------------------------------------------------------------------------------------------------------------------------------------------------------------------------------------------------------------------------------------------------------------------------------------------------------------------------------------------------------------------------------------------------------------------------------------------------------------------------------------------------------------------------------------------------------------------------------------------------------------------------------------------------------------------------------------------------------------------------------------------------------------------------------------------------------------------------------------------------------------------------------------------------------------------------------------------------------------------------------------------------------------------------------------------------------------------------------------------------------------------------------------------------------------------------------------------------------------------------------------------------------------------------------------------------------------------------------------------------------------------------------------------------------------------------------------------------------------------------------------------------------------------------------------------------------------|
| 5       | <p>“Attention Deficit Disorder with Hyperactivity/diet therapy”[Majr] OR “Attention Deficit Disorder with Hyperactivity/rehabilitation”[Majr] OR “Psychotherapy”[MeSH] OR “Behavior Therapy”[MeSH] OR “Parent-Child Relations”[MeSH] OR “Play Therapy”[MeSH] OR “Cognitive Therapy”[MeSH] OR “Time Management”[MeSH] OR “Computer-Assisted Instruction”[MeSH] OR “Diet Therapy”[MeSH] OR “Fatty Acids, Omega-3/therapeutic use”[MeSH] OR “Vitamins/administration and dosage”[Mesh] OR “Vitamins/therapeutic use”[MeSH] OR “Food Additives/adverse effects”[MeSH] OR “Probiotics/therapeutic use”[MeSH] OR “Acupuncture Therapy”[MeSH] OR “Remedial Teaching”[MeSH] OR “Early Intervention (Education)”[MeSH] OR “Complementary Therapies”[MeSH] OR “Combined Modality Therapy”[MeSH] OR “psychosocial therapy”[tiab] OR “psychosocial intervention”[tiab] OR “psychosocial interventions”[tiab] OR “psychosocial approach”[tiab] OR “psychosocial approaches”[tiab] OR “psychosocial treatment”[tiab] OR “psychosocial support”[tiab] OR “psychoeducation”[tiab] OR “nonpharmacologic therapy”[tiab] OR “nondrug therapy”[tiab] OR “non-drug therapy”[tiab] OR “Play Therapy”[tiab] OR “cognitive behavioral therapy”[tiab] OR “cognitive behavior therapy”[tiab] OR “cognitive behavioural therapy”[tiab] OR “cognitive behaviour therapy”[tiab] OR Mindfulness[tiab] OR complementary[tiab] OR “alternative medicine”[tiab] OR “alternative therapy”[tiab] OR “alternative therapies”[tiab] OR “Interpersonal skills training”[tiab] OR “Parent-Child Interaction Therapy”[tiab] OR “parent training”[tiab] OR “parent engagement”[tiab] OR “parent management”[tiab] OR “parenting skills”[tiab] OR “parenting intervention”[tiab] OR “parenting interventions”[tiab] OR “Barkley’s defiant child”[tiab] OR “Teacher-Child Interaction Training”[tiab] OR “Incredible Years”[tiab] OR “New Forest Parenting”[tiab] OR “Triple P”[tiab] OR “Helping the Noncompliant Child”[tiab] OR “child life and attention skills”[tiab] OR “clas”[tiab] OR PCIT[tiab] OR “parent child interaction therapy”[tiab] OR “Summer Treatment Program”[tiab] OR “Daily Report Card”[tiab] OR “organization skills”[tiab] OR “organizational skills”[tiab] OR “time management”[tiab] OR “homework intervention”[tiab] OR braintrain[tiab] OR “memory training”[tiab] OR “Captain’s log mindpower builder”[tiab] OR “memory gyms”[tiab] OR “attention gym”[tiab] OR “smartdriver plus”[tiab] OR “smartmind pro”[tiab] OR “RoboMemo”[tiab] OR “play attention”[tiab] OR metronome[tiab] OR brainmaster[tiab] OR mindmed[tiab] OR “attention lab”[tiab] OR (activate[tiab] AND c8[tiab]) OR “attention training”[tiab] OR “CogniPlus”[tiab] OR cogmed[tiab] OR “working memory training”[tiab] OR biofeedback[tiab] OR neurofeedback[tiab] OR neuroagility[tiab] OR neurooptimal[tiab] OR acupuncture[tiab] OR “vision training”[tiab] OR “visual training”[tiab] OR “vision therapy”[tiab] OR “education intervention”[tiab] OR “cognitive remediation”[tiab] OR neurotherapy[tiab] OR “elimination diet”[tiab] OR “diet therapy”[tiab] OR (“low carb” OR “low carbohydrate” OR “low carbohydrates”[tiab] OR “gluten free”) AND diet[tiab]) OR “feingold diet”[tiab] OR “red dye”[tiab] OR ((vitamin[tiab] OR vitamins[tiab]) AND (supplement[tiab] OR supplements[tiab])) OR “herbal supplement”[tiab] OR “herbal supplements”[tiab] OR probiotics[tiab] OR “omega 3”[tiab] OR “slow cortical potentials”[tiab] OR “few foods diet”[tiab] OR “oligoantigenic diet”[tiab] OR “restriction diet”[tiab] OR “food intolerance”[tiab] OR “food allergy”[tiab] OR “food allergies”[tiab] OR “food sensitivity”[tiab] OR “food sensitivities”[tiab] OR “multimodal treatment”[tiab] OR homeopathy[tiab] OR homeopathic[tiab] OR chiropractic[tiab] OR chiropractor[tiab]</p> |
| 6       | #4 OR #5                                                                                                                                                                                                                                                                                                                                                                                                                                                                                                                                                                                                                                                                                                                                                                                                                                                                                                                                                                                                                                                                                                                                                                                                                                                                                                                                                                                                                                                                                                                                                                                                                                                                                                                                                                                                                                                                                                                                                                                                                                                                                                                                                                                                                                                                                                                                                                                                                                                                                                                                                                                                                                                                                                                                                                                                                                                                                                                                                                                                                                                                                                                                                                                                                                                                                                                                                                                                                                                                                                                                                                                                                                                                                                                                                                                                                                              |
| 7       | #3 AND #6                                                                                                                                                                                                                                                                                                                                                                                                                                                                                                                                                                                                                                                                                                                                                                                                                                                                                                                                                                                                                                                                                                                                                                                                                                                                                                                                                                                                                                                                                                                                                                                                                                                                                                                                                                                                                                                                                                                                                                                                                                                                                                                                                                                                                                                                                                                                                                                                                                                                                                                                                                                                                                                                                                                                                                                                                                                                                                                                                                                                                                                                                                                                                                                                                                                                                                                                                                                                                                                                                                                                                                                                                                                                                                                                                                                                                                             |
| 8       | <p>(randomized controlled trial[pt] OR controlled clinical trial[pt] OR randomized[tiab] OR randomized[tiab] OR randomization[tiab] OR randomization[tiab] OR placebo[tiab] OR randomly[tiab] OR trial[tiab] OR groups[tiab] OR Clinical trial[pt] OR “clinical trial”[tiab] OR “clinical trials”[tiab] OR “evaluation studies”[pt] OR “evaluation studies as topic”[MeSH] OR “evaluation study”[tiab] OR “evaluation studies”[tiab] OR “intervention studies”[MeSH] OR “intervention study”[tiab] OR “intervention studies”[tiab] OR “case-control studies”[MeSH] OR “case-control”[tiab] OR “cohort studies”[MeSH] OR cohort[tiab] OR “longitudinal”[tiab] OR longitudinally[tiab] OR “prospective”[tiab] OR prospectively[tiab] OR “retrospective”[tiab] OR “comparative study”[pt] OR “comparative study”[tiab] OR systematic[sb] OR “meta-analysis”[pt] OR “meta-analysis as topic”[MeSH] OR “meta-analysis”[tiab] OR “meta-analyses”[tiab] NOT (Editorial[ptyp] OR Letter[pt] OR Case Reports[pt] OR Comment[pt]) NOT (animals[mh] NOT humans[mh]) AND English[la]</p>                                                                                                                                                                                                                                                                                                                                                                                                                                                                                                                                                                                                                                                                                                                                                                                                                                                                                                                                                                                                                                                                                                                                                                                                                                                                                                                                                                                                                                                                                                                                                                                                                                                                                                                                                                                                                                                                                                                                                                                                                                                                                                                                                                                                                                                                                                                                                                                                                                                                                                                                                                                                                                                                                                                                                                          |
| 9       | #7 AND #8                                                                                                                                                                                                                                                                                                                                                                                                                                                                                                                                                                                                                                                                                                                                                                                                                                                                                                                                                                                                                                                                                                                                                                                                                                                                                                                                                                                                                                                                                                                                                                                                                                                                                                                                                                                                                                                                                                                                                                                                                                                                                                                                                                                                                                                                                                                                                                                                                                                                                                                                                                                                                                                                                                                                                                                                                                                                                                                                                                                                                                                                                                                                                                                                                                                                                                                                                                                                                                                                                                                                                                                                                                                                                                                                                                                                                                             |
|         | Publication date from January 1, 2009                                                                                                                                                                                                                                                                                                                                                                                                                                                                                                                                                                                                                                                                                                                                                                                                                                                                                                                                                                                                                                                                                                                                                                                                                                                                                                                                                                                                                                                                                                                                                                                                                                                                                                                                                                                                                                                                                                                                                                                                                                                                                                                                                                                                                                                                                                                                                                                                                                                                                                                                                                                                                                                                                                                                                                                                                                                                                                                                                                                                                                                                                                                                                                                                                                                                                                                                                                                                                                                                                                                                                                                                                                                                                                                                                                                                                 |

**SUPPLEMENTAL TABLE 3** Exact Terms for All Searches Considered in the Full AHRQ Report, PubMed Search Strategy (November 4, 2016): Key Question 3

| Set No. | Terms                                                                                                                                                                                                                                                                                                                                                                                                                                                                                                                                                                                                                                                                                                                                                                                                                                                                                                                                                                                                                                                                  |
|---------|------------------------------------------------------------------------------------------------------------------------------------------------------------------------------------------------------------------------------------------------------------------------------------------------------------------------------------------------------------------------------------------------------------------------------------------------------------------------------------------------------------------------------------------------------------------------------------------------------------------------------------------------------------------------------------------------------------------------------------------------------------------------------------------------------------------------------------------------------------------------------------------------------------------------------------------------------------------------------------------------------------------------------------------------------------------------|
| 1       | "Attention Deficit Disorder with Hyperactivity"[Mesh] OR "attention deficit hyperactivity disorder"[tiab] OR "ADHD"[tiab] OR "attention deficit disorder"[tiab]                                                                                                                                                                                                                                                                                                                                                                                                                                                                                                                                                                                                                                                                                                                                                                                                                                                                                                        |
| 2       | "Pediatrics"[Mesh] OR "Adolescent"[Mesh] OR "Infant"[Mesh] OR "Child"[Mesh] OR child[tiab] OR children[tiab] OR infant[tiab] OR infants[tiab] OR preschool[tiab] OR preschooler[tiab] OR pediatric[tiab] OR teenager[tiab] OR teenagers[tiab] OR teenaged[tiab] OR teen[tiab] OR teens[tiab] OR adolescent[tiab] OR adolescents[tiab] OR adolescence[tiab] OR youth[tiab]                                                                                                                                                                                                                                                                                                                                                                                                                                                                                                                                                                                                                                                                                              |
| 3       | "Secondary Care"[Mesh] OR "Comprehensive Health Care"[Mesh] OR "primary care"[tiab] OR monitor[tiab] OR monitored[tiab] OR monitoring[tiab] OR "follow up"[tiab] OR "followed up"[tiab] OR visit[tiab] OR visits[tiab] OR session[tiab] OR sessions[tiab] OR appointment[tiab] OR appointments[tiab]                                                                                                                                                                                                                                                                                                                                                                                                                                                                                                                                                                                                                                                                                                                                                                   |
| 4       | (randomized controlled trial[pt] OR controlled clinical trial[pt] OR randomized[tiab] OR randomized[tiab] OR randomization[tiab] OR randomization[tiab] OR placebo[tiab] OR randomly[tiab] OR trial[tiab] OR groups[tiab] OR Clinical trial[pt] OR "clinical trial"[tiab] OR "clinical trials"[tiab] OR "evaluation studies"[pt] OR "evaluation studies as topic"[MeSH] OR "evaluation study"[tiab] OR "evaluation studies"[tiab] OR "intervention studies"[MeSH] OR "intervention study"[tiab] OR "intervention studies"[tiab] OR "case-control studies"[MeSH] OR "case-control"[tiab] OR "cohort studies"[MeSH] OR cohort[tiab] OR "longitudinal"[tiab] OR longitudinally[tiab] OR "prospective"[tiab] OR prospectively[tiab] OR "retrospective"[tiab] OR "comparative study"[pt] OR "comparative study"[tiab] OR systematic[sb] OR "meta-analysis"[pt] OR "meta-analysis as topic"[MeSH] OR "meta-analysis"[tiab] OR "meta-analyses"[tiab]) NOT (Editorial[ptyp] OR Letter[pt] OR Case Reports[pt] OR Comment[pt]) NOT (animals[mh] NOT humans[mh]) AND English[la] |
| 5       | #1 AND #2 AND #3 AND #4<br>Publication date from January 1, 2009                                                                                                                                                                                                                                                                                                                                                                                                                                                                                                                                                                                                                                                                                                                                                                                                                                                                                                                                                                                                       |

**SUPPLEMENTAL TABLE 4** Exact Terms for All Searches Considered in the Full AHRQ Report, Embase Search Strategy (November 7, 2016): Key Question 1

| Set No. | Terms                                                                                                                                                                                                                                                                                                                                                                                                                                                                                                                                                                                                                                                                                                                                                                                                                                                                                                                                                                                                                                                                                                                                                                                                                                                                                                                                                                                                                                                                          |
|---------|--------------------------------------------------------------------------------------------------------------------------------------------------------------------------------------------------------------------------------------------------------------------------------------------------------------------------------------------------------------------------------------------------------------------------------------------------------------------------------------------------------------------------------------------------------------------------------------------------------------------------------------------------------------------------------------------------------------------------------------------------------------------------------------------------------------------------------------------------------------------------------------------------------------------------------------------------------------------------------------------------------------------------------------------------------------------------------------------------------------------------------------------------------------------------------------------------------------------------------------------------------------------------------------------------------------------------------------------------------------------------------------------------------------------------------------------------------------------------------|
| 1       | 'attention deficit disorder'/exp OR "attention deficit hyperactivity disorder":ab,ti OR "ADHD":ab,ti OR "attention deficit disorder":ab,ti                                                                                                                                                                                                                                                                                                                                                                                                                                                                                                                                                                                                                                                                                                                                                                                                                                                                                                                                                                                                                                                                                                                                                                                                                                                                                                                                     |
| 2       | 'pediatrics'/exp OR 'adolescent'/exp OR 'infant'/exp OR 'child'/exp OR child:ab,ti OR children:ab,ti OR infant:ab,ti OR infants:ab,ti OR preschool:ab,ti OR preschooler:ab,ti OR pediatric:ab,ti OR teenager:ab,ti OR teenagers:ab,ti OR teenaged:ab,ti OR teen:ab,ti OR teens:ab,ti OR adolescent:ab,ti OR adolescents:ab,ti OR adolescence:ab,ti OR youth:ab,ti                                                                                                                                                                                                                                                                                                                                                                                                                                                                                                                                                                                                                                                                                                                                                                                                                                                                                                                                                                                                                                                                                                              |
| 3       | 'attention deficit disorder'/exp/mj/dm_di OR 'screening'/exp OR 'interview'/exp OR 'psychometry'/exp OR 'psychological rating scale'/exp OR 'diagnosis'/exp OR 'assessment of humans'/exp OR 'checklist'/exp OR 'clinical assessment tool'/exp OR 'clinical observation'/exp OR 'Diagnostic and Statistical Manual of Mental Disorders'/exp OR 'patient referral'/exp OR questionnaire:ab,ti OR questionnaires:ab,ti OR screening:ab,ti OR screen:ab,ti OR scale:ab,ti OR instrument:ab,ti OR instruments:ab,ti OR interview:ab,ti OR interviews:ab,ti OR DSM*:ab,ti OR diagnosis:ab,ti OR diagnostic:ab,ti OR diagnosed:ab,ti OR (Vanderbilt:ab,ti AND scale:ab,ti) OR conners:ab,ti OR cps:ab,ti OR ctrs:ab,ti OR cps:ab,ti OR crs:ab,ti OR "snap-IV":ab,ti OR "snap-4":ab,ti OR "baso-2":ab,ti OR "behavioral assessment system for children":ab,ti OR dbdrs:ab,ti OR "disruptive behavior disorder rating scale":ab,ti OR adhd-rs:ab,ti OR "adhd rating scale":ab,ti OR ksads:ab,ti OR k-sads:ab,ti OR kiddie-sads:ab,ti OR DISC:ab,ti OR "dominance inducement submission and compliance":ab,ti OR "diagnostic interview schedule for children":ab,ti OR "diagnostic inventory for screening children":ab,ti OR "mini-kid":ab,ti OR "Mini Interational Neuropsychiatric interview":ab,ti OR "iva-2":ab,ti OR "iva-qs":ab,ti OR "iva-ae2":ab,ti OR tova:ab,ti OR "test of variables of attention":ab,ti OR "neuropsychiatric eeg-based assessment aid":ab,ti OR neba:ab,ti |
| 4       | ('sensitivity and specificity'/exp OR 'predictive value'/exp OR 'diagnostic error'/exp OR sensitivity:ab,ti OR specificity:ab,ti OR accuracy:ab,ti OR accurate:ab,ti OR accurately:ab,ti OR misdiagnos*:ab,ti OR 'randomized controlled trial'/exp OR 'crossover procedure'/exp OR 'double-blind procedure'/exp OR 'single blind procedure'/exp OR random*:ab,ti OR factorial*:ab,ti OR crossover*:ab,ti OR (cross NEAR/1 over*):ab,ti OR placebo*:ab,ti OR (doubl* NEAR/1 blind*):ab,ti OR (singl* NEAR/1 blind*):ab,ti OR assign*:ab,ti OR allocat*:ab,ti OR volunteer*:ab,ti OR 'clinical study'/exp OR 'clinical trial':ti,ab OR 'clinical trials':ti,ab OR 'controlled study'/exp OR 'evaluation'/exp OR 'evaluation study':ab,ti OR 'evaluation studies':ab,ti OR 'intervention study':ab,ti OR 'intervention studies':ab,ti OR 'case control':ab,ti OR 'cohort analysis'/exp OR cohort:ab,ti OR longitudinal*:ab,ti OR prospective:ab,ti OR prospectively:ab,ti OR retrospective:ab,ti OR 'follow up'/exp OR 'follow up':ab,ti OR 'comparative effectiveness'/exp OR 'comparative study'/exp OR 'comparative study':ab,ti OR 'comparative studies':ab,ti OR 'evidence based medicine'/exp OR 'systematic review':ab,ti OR 'meta-analysis':ab,ti OR 'meta-analyses':ab,ti) NOT ('case report'/exp OR 'case study'/exp OR 'editorial'/exp OR 'letter'/exp OR 'note'/exp)                                                                                                  |
| 5       | #1 AND #2 AND #3 AND #4                                                                                                                                                                                                                                                                                                                                                                                                                                                                                                                                                                                                                                                                                                                                                                                                                                                                                                                                                                                                                                                                                                                                                                                                                                                                                                                                                                                                                                                        |
| 6       | #5 AND [embase]/lim NOT [medline]/lim                                                                                                                                                                                                                                                                                                                                                                                                                                                                                                                                                                                                                                                                                                                                                                                                                                                                                                                                                                                                                                                                                                                                                                                                                                                                                                                                                                                                                                          |
| 7       | #6 AND [humans]/lim AND [2009-2015]/py                                                                                                                                                                                                                                                                                                                                                                                                                                                                                                                                                                                                                                                                                                                                                                                                                                                                                                                                                                                                                                                                                                                                                                                                                                                                                                                                                                                                                                         |

**SUPPLEMENTAL TABLE 5** Exact Terms for All Searches Considered in the Full AHRQ Report, Embase Search Strategy (November 7, 2016): Key Question 2

| Set No. | Terms                                                                                                                                                                                                                                                                                                                                                                                                                                                                                                                                                                                                                                                                                                                                                                                                                                                                                                                                                                                                                                                                                                                                                                                                                                                                                                                                                                                                                                                                                                                                                                                                                                                                                                                                                                                                                                                                                                                                                                                                                                                                                                                                                                                                                                                                                                                                                                                                                                                                                                                                                                                                                                                                                                                                                                                                                                                                                                                                                                                                                                                                                                                                                                                                                                                                                                                                                                                                                                                                                                                                                                   |
|---------|-------------------------------------------------------------------------------------------------------------------------------------------------------------------------------------------------------------------------------------------------------------------------------------------------------------------------------------------------------------------------------------------------------------------------------------------------------------------------------------------------------------------------------------------------------------------------------------------------------------------------------------------------------------------------------------------------------------------------------------------------------------------------------------------------------------------------------------------------------------------------------------------------------------------------------------------------------------------------------------------------------------------------------------------------------------------------------------------------------------------------------------------------------------------------------------------------------------------------------------------------------------------------------------------------------------------------------------------------------------------------------------------------------------------------------------------------------------------------------------------------------------------------------------------------------------------------------------------------------------------------------------------------------------------------------------------------------------------------------------------------------------------------------------------------------------------------------------------------------------------------------------------------------------------------------------------------------------------------------------------------------------------------------------------------------------------------------------------------------------------------------------------------------------------------------------------------------------------------------------------------------------------------------------------------------------------------------------------------------------------------------------------------------------------------------------------------------------------------------------------------------------------------------------------------------------------------------------------------------------------------------------------------------------------------------------------------------------------------------------------------------------------------------------------------------------------------------------------------------------------------------------------------------------------------------------------------------------------------------------------------------------------------------------------------------------------------------------------------------------------------------------------------------------------------------------------------------------------------------------------------------------------------------------------------------------------------------------------------------------------------------------------------------------------------------------------------------------------------------------------------------------------------------------------------------------------------|
| 1       | 'attention deficit disorder'/exp OR "attention deficit hyperactivity disorder":ab,ti OR "ADHD":ab,ti OR "attention deficit disorder":ab,ti                                                                                                                                                                                                                                                                                                                                                                                                                                                                                                                                                                                                                                                                                                                                                                                                                                                                                                                                                                                                                                                                                                                                                                                                                                                                                                                                                                                                                                                                                                                                                                                                                                                                                                                                                                                                                                                                                                                                                                                                                                                                                                                                                                                                                                                                                                                                                                                                                                                                                                                                                                                                                                                                                                                                                                                                                                                                                                                                                                                                                                                                                                                                                                                                                                                                                                                                                                                                                              |
| 2       | 'pediatrics'/exp OR 'adolescent'/exp OR 'infant'/exp OR 'child'/exp OR child:ab,ti OR children:ab,ti OR infant:ab,ti OR infants:ab,ti OR preschool:ab,ti OR preschooler:ab,ti OR pediatric:ab,ti OR teenager:ab,ti OR teenagers:ab,ti OR teenaged:ab,ti OR teen:ab,ti OR teens:ab,ti OR adolescent:ab,ti OR adolescence:ab,ti OR adolescence:ab,ti OR youth:ab,ti                                                                                                                                                                                                                                                                                                                                                                                                                                                                                                                                                                                                                                                                                                                                                                                                                                                                                                                                                                                                                                                                                                                                                                                                                                                                                                                                                                                                                                                                                                                                                                                                                                                                                                                                                                                                                                                                                                                                                                                                                                                                                                                                                                                                                                                                                                                                                                                                                                                                                                                                                                                                                                                                                                                                                                                                                                                                                                                                                                                                                                                                                                                                                                                                       |
| 3       | #1 AND #2                                                                                                                                                                                                                                                                                                                                                                                                                                                                                                                                                                                                                                                                                                                                                                                                                                                                                                                                                                                                                                                                                                                                                                                                                                                                                                                                                                                                                                                                                                                                                                                                                                                                                                                                                                                                                                                                                                                                                                                                                                                                                                                                                                                                                                                                                                                                                                                                                                                                                                                                                                                                                                                                                                                                                                                                                                                                                                                                                                                                                                                                                                                                                                                                                                                                                                                                                                                                                                                                                                                                                               |
| 4       | 'attention deficit disorder'/exp/mj/dm_dt OR 'central stimulant agent'/exp OR 'psychostimulant agent'/exp OR 'guanfacine'/exp OR 'adrenergic receptor affecting agent'/exp OR 'atomoxetine'/exp OR 'antidepressant agent'/exp OR 'dopamine uptake inhibitor'/exp OR 'n methyl dextro aspartic acid receptor'/exp OR 'memantine'/exp OR 'amantadine'/exp OR 'dopamine uptake inhibitor'/exp OR 'Central Nervous System Stimulants':ab,ti OR 'psychostimulant':ab,ti OR 'Methylphenidate':ab,ti OR 'Methylphenidate Hydrochloride':ab,ti OR 'Aptensio':ab,ti OR 'Concerta':ab,ti OR 'Ritalin':ab,ti OR 'Ritalin LA':ab,ti OR 'Medikinet':ab,ti OR 'Equasym':ab,ti OR 'Quillivant':ab,ti OR 'Metadate':ab,ti OR 'Daytrana':ab,ti OR 'Dexmethylphenidate':ab,ti OR 'Dexmethylphenidate Hydrochloride':ab,ti OR 'Focalin':ab,ti OR 'Dextroamphetamine':ab,ti OR 'Dexedrine':ab,ti OR 'Dextrostat':ab,ti OR 'ProCentra':ab,ti OR 'Zenedi':ab,ti OR 'mixed amphetamine salts':ab,ti OR 'Adderall':ab,ti OR 'lisdexamfetamine':ab,ti OR 'lisdexamfetamine dimesylate':ab,ti OR 'Vyvanse':ab,ti OR 'Venvanse':ab,ti OR 'Elvanse':ab,ti OR 'Tyvanse':ab,ti OR 'Dyanavel':ab,ti OR 'Evekeo':ab,ti OR 'Guanfacine':ab,ti OR 'Sympatholytics':ab,ti OR 'Central $\alpha$ -2 Adrenergic Agonist':ab,ti OR 'Clonidine':ab,ti OR 'Intuniv':ab,ti OR 'Estulic':ab,ti OR 'Tenex':ab,ti OR 'Catapres':ab,ti OR 'Clophelin':ab,ti OR 'Kapvay':ab,ti OR 'Nexiclon':ab,ti OR 'Duraclon':ab,ti OR 'Norepinephrine Reuptake Inhibitors':ab,ti OR 'Selective Norepinephrine Reuptake Inhibitors':ab,ti OR 'Adrenergic Uptake Inhibitors':ab,ti OR 'atomoxetine':ab,ti OR 'Strattera':ab,ti OR 'Tricyclic antidepressants':ab,ti OR 'Desipramine':ab,ti OR 'Norpramin':ab,ti OR 'Nortriptyline':ab,ti OR 'Pamelor':ab,ti OR 'Dopamine Reuptake Inhibitors':ab,ti OR 'modafinil':ab,ti OR 'Provigil':ab,ti OR 'Armodafinil':ab,ti OR 'Norepinephrine-dopamine Reuptake Inhibitors':ab,ti OR 'Bupropion':ab,ti OR 'Wellbutrin':ab,ti OR 'Forfivo':ab,ti OR 'Cymbalta':ab,ti OR 'venlafaxine':ab,ti OR 'reboxetine':ab,ti OR 'Monoamine Oxidase Type B inhibitors':ab,ti OR 'Selegiline':ab,ti OR 'Eldepryl':ab,ti OR 'Zelapar':ab,ti OR 'NMDA receptors':ab,ti OR 'N-Methyl-D-aspartate receptor Antagonists':ab,ti OR 'Amantadine':ab,ti OR 'Memantine':ab,ti OR 'Pertofrane':ab,ti OR 'Nuvigil':ab,ti OR 'Cymbalta':ab,ti OR 'duloxetine':ab,ti OR 'Effexor':ab,ti OR 'Eldepryl':ab,ti OR 'Emsam':ab,ti OR 'Trevilor':ab,ti OR 'Symmetrel':ab,ti OR 'Namenda':ab,ti OR 'Zelapar':ab,ti                                                                                                                                                                                                                                                                                                                                                                                                                                                                                                                                                                                                                                                                                                                                                                                                                                                                                                                                                                                                            |
| 5       | 'attention deficit disorder'/exp/mj/dm_rh,dm_dm OR 'psychotherapy'/exp OR 'child psychiatry'/exp OR 'child parent relation'/exp OR 'time management'/exp OR 'feedback system'/exp OR 'teaching'/exp OR 'adaptive behavior'/exp OR 'diet therapy'/exp OR 'omega 3 fatty acid'/exp OR 'vitamin'/exp/dd_do,dd_dt,dd_ad OR 'food additive'/exp/dd_ae OR 'probiotic agent'/exp OR 'acupuncture'/exp OR 'early childhood intervention'/exp OR 'alternative medicine'/exp OR 'psychosocial therapy':ab,ti OR 'psychosocial intervention':ab,ti OR 'psychosocial interventions':ab,ti OR 'psychosocial approach':ab,ti OR 'psychosocial approaches':ab,ti OR 'psychosocial treatment':ab,ti OR 'psychosocial support':ab,ti OR 'psychoeducation':ab,ti OR 'nonpharmacologic therapy':ab,ti OR 'non-drug therapy':ab,ti OR 'non-drug therapy':ab,ti OR 'Play Therapy':ab,ti OR 'cognitive behavioral therapy':ab,ti OR 'cognitive behavior therapy':ab,ti OR 'cognitive behavioral therapy':ab,ti OR 'cognitive behavior therapy':ab,ti OR 'Mindfulness':ab,ti OR 'complementary':ab,ti OR 'alternative medicine':ab,ti OR 'alternative therapy':ab,ti OR 'alternative therapies':ab,ti OR 'Interpersonal skills training':ab,ti OR 'Parent-Child Interaction Therapy':ab,ti OR 'parent training':ab,ti OR 'parent engagement':ab,ti OR 'parent management':ab,ti OR 'parenting skills':ab,ti OR 'parenting intervention':ab,ti OR 'parenting interventions':ab,ti OR 'Barkleys defiant child':ab,ti OR 'Teacher-Child Interaction Training':ab,ti OR 'Incredible Years':ab,ti OR 'New Forest Parenting':ab,ti OR 'Triple P':ab,ti OR 'Helping the Noncompliant Child':ab,ti OR 'child life and attention skills':ab,ti OR 'clas':ab,ti OR PCIT:ab,ti OR 'parent child interaction therapy':ab,ti OR 'Summer Treatment Program':ab,ti OR 'Daily Report Card':ab,ti OR 'organization skills':ab,ti OR 'organizational skills':ab,ti OR 'time management':ab,ti OR 'homework intervention':ab,ti OR 'braintrain':ab,ti OR 'memory training':ab,ti OR 'Captains log mindpower builder':ab,ti OR 'memory gyms':ab,ti OR 'attention gym':ab,ti OR 'smartdriver plus':ab,ti OR 'smartmind pro':ab,ti OR 'RoboMemo':ab,ti OR 'play attention':ab,ti OR 'metronome':ab,ti OR 'brainmaster':ab,ti OR 'mindmed':ab,ti OR 'attention laboratory':ab,ti OR (activate:ab,ti AND c8:ab,ti) OR 'attention training':ab,ti OR 'CogniPlus':ab,ti OR 'cogmed':ab,ti OR 'working memory training':ab,ti OR 'biofeedback':ab,ti OR 'neurofeedback':ab,ti OR 'neuroagility':ab,ti OR 'neurooptimal':ab,ti OR 'acupuncture':ab,ti OR 'vision training':ab,ti OR 'visual training':ab,ti OR 'vision therapy':ab,ti OR 'education intervention':ab,ti OR 'cognitive remediation':ab,ti OR 'neurotherapy':ab,ti OR 'elimination diet':ab,ti OR 'diet therapy':ab,ti OR (('low carb' OR 'low carbohydrate' OR 'low carbohydrates':ab,ti OR 'gluten free') AND diet:ab,ti) OR 'feingold diet':ab,ti OR 'red dye':ab,ti OR ((vitamin:ab,ti OR vitamins:ab,ti) AND (supplement:ab,ti OR supplements:ab,ti)) OR 'herbal supplement':ab,ti OR 'herbal supplements':ab,ti OR 'probiotics':ab,ti OR 'omega 3':ab,ti OR 'slow cortical potentials':ab,ti OR 'few foods diet':ab,ti OR 'oligoantigenic diet':ab,ti OR 'restriction diet':ab,ti OR 'food intolerance':ab,ti OR 'food allergy':ab,ti OR 'food allergies':ab,ti OR 'food sensitivity':ab,ti OR 'food sensitivities':ab,ti OR 'multimodal treatment':ab,ti OR 'homeopathy':ab,ti OR 'homeopathic':ab,ti OR 'chiropractic':ab,ti OR 'chiropractor':ab,ti |
| 6       | #4 OR #5                                                                                                                                                                                                                                                                                                                                                                                                                                                                                                                                                                                                                                                                                                                                                                                                                                                                                                                                                                                                                                                                                                                                                                                                                                                                                                                                                                                                                                                                                                                                                                                                                                                                                                                                                                                                                                                                                                                                                                                                                                                                                                                                                                                                                                                                                                                                                                                                                                                                                                                                                                                                                                                                                                                                                                                                                                                                                                                                                                                                                                                                                                                                                                                                                                                                                                                                                                                                                                                                                                                                                                |
| 7       | #3 AND #6                                                                                                                                                                                                                                                                                                                                                                                                                                                                                                                                                                                                                                                                                                                                                                                                                                                                                                                                                                                                                                                                                                                                                                                                                                                                                                                                                                                                                                                                                                                                                                                                                                                                                                                                                                                                                                                                                                                                                                                                                                                                                                                                                                                                                                                                                                                                                                                                                                                                                                                                                                                                                                                                                                                                                                                                                                                                                                                                                                                                                                                                                                                                                                                                                                                                                                                                                                                                                                                                                                                                                               |
| 8       | ('randomized controlled trial'/exp OR 'crossover procedure'/exp OR 'double-blind procedure'/exp OR 'single blind procedure'/exp OR random*:ab,ti OR factorial*:ab,ti OR crossover*:ab,ti OR (cross NEAR/1 over*):ab,ti OR placebo*:ab,ti OR (doubl* NEAR/1 blind*):ab,ti OR (singl* NEAR/1 blind*):ab,ti OR assign*:ab,ti OR allocat*:ab,ti OR volunteer*:ab,ti OR 'clinical study'/exp OR 'clinical trial':ab,ti OR 'clinical trials':ab,ti OR 'controlled study'/exp OR 'evaluation'/exp OR 'evaluation study':ab,ti OR 'evaluation studies':ab,ti OR 'intervention study':ab,ti OR 'intervention studies':ab,ti OR 'case control':ab,ti OR 'cohort analysis'/exp OR 'cohort':ab,ti OR 'cohort study':ab,ti OR 'longitudinal':ab,ti OR 'prospectively':ab,ti OR 'retrospective':ab,ti OR 'follow up'/exp OR 'follow up':ab,ti OR 'comparative effectiveness'/exp OR 'comparative study'/exp OR 'comparative study':ab,ti OR 'comparative studies':ab,ti OR 'evidence based medicine'/exp OR 'systematic review':ab,ti OR 'meta-analysis':ab,ti OR 'meta-analyses':ab,ti) NOT ('case report'/exp OR 'case study'/exp OR 'editorial'/exp OR 'letter'/exp OR 'note'/exp)                                                                                                                                                                                                                                                                                                                                                                                                                                                                                                                                                                                                                                                                                                                                                                                                                                                                                                                                                                                                                                                                                                                                                                                                                                                                                                                                                                                                                                                                                                                                                                                                                                                                                                                                                                                                                                                                                                                                                                                                                                                                                                                                                                                                                                                                                                                                                                                                 |
| #9      | #7 AND #8                                                                                                                                                                                                                                                                                                                                                                                                                                                                                                                                                                                                                                                                                                                                                                                                                                                                                                                                                                                                                                                                                                                                                                                                                                                                                                                                                                                                                                                                                                                                                                                                                                                                                                                                                                                                                                                                                                                                                                                                                                                                                                                                                                                                                                                                                                                                                                                                                                                                                                                                                                                                                                                                                                                                                                                                                                                                                                                                                                                                                                                                                                                                                                                                                                                                                                                                                                                                                                                                                                                                                               |
| #10     | #9 AND [embase]/lim NOT [medline]/lim                                                                                                                                                                                                                                                                                                                                                                                                                                                                                                                                                                                                                                                                                                                                                                                                                                                                                                                                                                                                                                                                                                                                                                                                                                                                                                                                                                                                                                                                                                                                                                                                                                                                                                                                                                                                                                                                                                                                                                                                                                                                                                                                                                                                                                                                                                                                                                                                                                                                                                                                                                                                                                                                                                                                                                                                                                                                                                                                                                                                                                                                                                                                                                                                                                                                                                                                                                                                                                                                                                                                   |
| #11     | #10 AND [humans]/lim AND [2009-2015]/py                                                                                                                                                                                                                                                                                                                                                                                                                                                                                                                                                                                                                                                                                                                                                                                                                                                                                                                                                                                                                                                                                                                                                                                                                                                                                                                                                                                                                                                                                                                                                                                                                                                                                                                                                                                                                                                                                                                                                                                                                                                                                                                                                                                                                                                                                                                                                                                                                                                                                                                                                                                                                                                                                                                                                                                                                                                                                                                                                                                                                                                                                                                                                                                                                                                                                                                                                                                                                                                                                                                                 |

**SUPPLEMENTAL TABLE 6** Exact Terms for All Searches Considered in the Full AHRQ Report, Embase Search Strategy (November 7, 2016): Key Question 3

| Set No. | Terms                                                                                                                                                                                                                                                                                                                                                                                                                                                                                                                                                                                                                                                                                                                                                                                                                                                                                                                                                                                                                                                                                                                                                         |
|---------|---------------------------------------------------------------------------------------------------------------------------------------------------------------------------------------------------------------------------------------------------------------------------------------------------------------------------------------------------------------------------------------------------------------------------------------------------------------------------------------------------------------------------------------------------------------------------------------------------------------------------------------------------------------------------------------------------------------------------------------------------------------------------------------------------------------------------------------------------------------------------------------------------------------------------------------------------------------------------------------------------------------------------------------------------------------------------------------------------------------------------------------------------------------|
| 1       | 'attention deficit disorder'/exp OR "attention deficit hyperactivity disorder":ab,ti OR "ADHD":ab,ti OR "attention deficit disorder":ab,ti                                                                                                                                                                                                                                                                                                                                                                                                                                                                                                                                                                                                                                                                                                                                                                                                                                                                                                                                                                                                                    |
| 2       | 'pediatrics'/exp OR 'adolescent'/exp OR 'infant'/exp OR 'child'/exp OR child:ab,ti OR children:ab,ti OR infant:ab,ti OR infants:ab,ti OR preschool:ab,ti OR preschooler:ab,ti OR pediatric:ab,ti OR teenager:ab,ti OR teenagers:ab,ti OR teenaged:ab,ti OR teen:ab,ti OR teens:ab,ti OR adolescent:ab,ti OR adolescents:ab,ti OR adolescence:ab,ti OR youth:ab,ti                                                                                                                                                                                                                                                                                                                                                                                                                                                                                                                                                                                                                                                                                                                                                                                             |
| 3       | 'evaluation and follow up'/exp OR 'primary health care'/exp OR 'secondary health care'/exp OR 'clinical handover'/exp OR 'patient monitoring'/exp OR monitor:ab,ti OR monitored:ab,ti OR monitoring:ab,ti OR "follow up":ab,ti OR "followed up":ab,ti OR visit:ab,ti OR visits:ab,ti OR session:ab,ti OR sessions:ab,ti OR appointment:ab,ti OR appointments:ab,ti                                                                                                                                                                                                                                                                                                                                                                                                                                                                                                                                                                                                                                                                                                                                                                                            |
| 4       | ('randomized controlled trial'/exp OR 'crossover procedure'/exp OR 'double-blind procedure'/exp OR 'single blind procedure'/exp OR random*:ab,ti OR factorial*:ab,ti OR crossover*:ab,ti OR (cross NEAR/1 over*):ab,ti OR placebo*:ab,ti OR (doubl* NEAR/1 blind*):ab,ti OR (singl* NEAR/1 blind*):ab,ti OR assign*:ab,ti OR allocat*:ab,ti OR volunteer*:ab,ti OR 'clinical study'/exp OR 'clinical trial':ti,ab OR 'clinical trials':ti,ab OR 'controlled study'/exp OR 'evaluation'/exp OR 'evaluation study':ab,ti OR 'evaluation studies':ab,ti OR 'intervention study':ab,ti OR 'intervention studies':ab,ti OR 'case control':ab,ti OR 'cohort analysis'/exp OR cohort:ab,ti OR longitudinal*:ab,ti OR prospective:ab,ti OR prospectively:ab,ti OR retrospective:ab,ti OR 'follow up'/exp OR 'follow up':ab,ti OR 'comparative effectiveness'/exp OR 'comparative study'/exp OR 'comparative study':ab,ti OR 'comparative studies':ab,ti OR 'evidence based medicine'/exp OR 'systematic review':ab,ti OR 'meta-analysis':ab,ti OR 'meta-analyses':ab,ti) NOT ('case report'/exp OR 'case study'/exp OR 'editorial'/exp OR 'letter'/exp OR 'note'/exp) |
| 5       | #1 AND #2 AND #3 AND #4                                                                                                                                                                                                                                                                                                                                                                                                                                                                                                                                                                                                                                                                                                                                                                                                                                                                                                                                                                                                                                                                                                                                       |
| 6       | #5 AND [humans]/lim AND [2009-2015]/py                                                                                                                                                                                                                                                                                                                                                                                                                                                                                                                                                                                                                                                                                                                                                                                                                                                                                                                                                                                                                                                                                                                        |
| 7       | #6 AND [embase]/lim NOT [medline]/lim                                                                                                                                                                                                                                                                                                                                                                                                                                                                                                                                                                                                                                                                                                                                                                                                                                                                                                                                                                                                                                                                                                                         |

**SUPPLEMENTAL TABLE 7** Exact Terms for All Searches Considered in the Full AHRQ Report, PsycINFO Search Strategy (November 7, 2016): Key Question 1

| Set No. | Terms                                                                                                                                                                                                                                                                                                                                                                                                                                                                                                                                                                                                                                                                                                                                                                                                                                                                                                                                                                                                                                                                                                                                                                                                                                                                                                                                                                                                                                                                                                                                                                                                                                                                                                                                                                                                                                                                                                                                                                                                                                                                                                              |
|---------|--------------------------------------------------------------------------------------------------------------------------------------------------------------------------------------------------------------------------------------------------------------------------------------------------------------------------------------------------------------------------------------------------------------------------------------------------------------------------------------------------------------------------------------------------------------------------------------------------------------------------------------------------------------------------------------------------------------------------------------------------------------------------------------------------------------------------------------------------------------------------------------------------------------------------------------------------------------------------------------------------------------------------------------------------------------------------------------------------------------------------------------------------------------------------------------------------------------------------------------------------------------------------------------------------------------------------------------------------------------------------------------------------------------------------------------------------------------------------------------------------------------------------------------------------------------------------------------------------------------------------------------------------------------------------------------------------------------------------------------------------------------------------------------------------------------------------------------------------------------------------------------------------------------------------------------------------------------------------------------------------------------------------------------------------------------------------------------------------------------------|
| 1       | DE "Attention Deficit Disorder with Hyperactivity" OR TI ("attention deficit hyperactivity disorder" OR ADHD OR "attention deficit disorder") OR AB ("attention deficit hyperactivity disorder" OR ADHD OR "attention deficit disorder")                                                                                                                                                                                                                                                                                                                                                                                                                                                                                                                                                                                                                                                                                                                                                                                                                                                                                                                                                                                                                                                                                                                                                                                                                                                                                                                                                                                                                                                                                                                                                                                                                                                                                                                                                                                                                                                                           |
| 2       | AG (childhood OR adolescence) OR DE "Pediatrics" OR TI (child OR children OR infant OR infants OR preschool OR preschooler OR pediatric OR teenager OR teenagers OR teenaged OR teen OR teens OR adolescent OR adolescents OR adolescence OR youth) OR AB (child OR children OR infant OR infants OR preschool OR preschooler OR pediatric OR teenager OR teenagers OR teenaged OR teen OR teens OR adolescent OR adolescents OR adolescence OR youth)                                                                                                                                                                                                                                                                                                                                                                                                                                                                                                                                                                                                                                                                                                                                                                                                                                                                                                                                                                                                                                                                                                                                                                                                                                                                                                                                                                                                                                                                                                                                                                                                                                                             |
| 3       | DE "Screening" OR DE "Health Screening" OR DE "Questionnaires" OR DE "Screening Tests" OR DE "Psychological Screening Inventory" OR DE "Psychiatric Evaluation" OR DE "Psychodiagnosis" OR DE "Psychodiagnostic Interview" OR DE "Psychometrics" OR DE "Rating Scales" OR DE "Diagnosis" OR DE "Diagnostic and Statistical Manual" OR DE "Professional Referral" OR DE "Diagnostic Interview Schedule" OR DE "Behavioral Assessment" OR TI (questionnaire OR questionnaires OR screening OR screen OR scale OR instrument OR instruments OR interview OR interviews OR DSM* OR diagnosis OR diagnostic OR diagnosed OR (Vanderbilt AND scale) OR conners OR cprs OR ctrs OR cprs OR crs OR "snap-IV" OR "snap-4" OR "bas-2" OR "behavioral assessment system for children" OR dbdrs OR "disruptive behavior disorder rating scale" OR adhd-rs OR "adhd rating scale" OR ksads OR k-sads OR kiddie-sads OR DISC OR "dominance inducement submission and compliance" OR "diagnostic interview schedule for children" OR "diagnostic inventory for screening children" OR "mini-kid" OR "Mini Interational Neuropsychiatric interview" OR "iva-2" OR "iva-qs" OR "iva-ae2" OR tova OR "test of variables of attention" OR "neuropsychiatric eeg-based assessment aid" OR neba) OR AB (questionnaire OR questionnaires OR screening OR screen OR scale OR instrument OR instruments OR interview OR interviews OR DSM* OR diagnosis OR diagnostic OR diagnosed OR (Vanderbilt AND scale) OR conners OR cprs OR ctrs OR cprs OR crs OR "snap-IV" OR "snap-4" OR "bas-2" OR "behavioral assessment system for children" OR dbdrs OR "disruptive behavior disorder rating scale" OR adhd-rs OR "adhd rating scale" OR ksads OR k-sads OR kiddie-sads OR DISC OR "dominance inducement submission and compliance" OR "diagnostic interview schedule for children" OR "diagnostic inventory for screening children" OR "mini-kid" OR "Mini Interational Neuropsychiatric interview" OR "iva-2" OR "iva-qs" OR "iva-ae2" OR tova OR "test of variables of attention" OR "neuropsychiatric eeg-based assessment aid" OR neba) |
| 4       | (DE "Misdiagnosis" OR ZC "longitudinal study" OR ZC "empirical study" OR ZC "followup study" OR ZC "longitudinal study" OR ZC "meta analysis" OR ZC "prospective study" OR ZC "retrospective study" OR ZC "systematic review" OR ZC "treatment outcome/clinical trial" OR DE "Clinical Trials" OR DE "Cohort Analysis" OR DE "Followup Studies" OR DE "Longitudinal Studies" OR DE "Prospective Studies" OR DE "Meta Analysis" OR TI (sensitivity OR specificity OR accuracy OR accurate OR accurately OR misdiagnos* OR randomized OR randomized OR randomization OR randomization OR randomly OR trial OR groups OR trials OR "evaluation study" OR evaluation studies OR "intervention study" OR "intervention studies" OR "case-control" OR cohort OR "cross-sectional" OR longitudinal OR longitudinally OR prospective OR prospectively OR retrospective OR "comparative study" OR "meta-analysis" OR "meta-analyses") OR AB (sensitivity OR specificity OR accuracy OR accurate OR accurately OR misdiagnos* OR randomized OR randomized OR randomization OR randomization OR randomly OR trial OR groups OR trials OR "evaluation study" OR evaluation studies OR "intervention study" OR "intervention studies" OR "case-control" OR cohort OR "cross-sectional" OR longitudinal OR longitudinally OR prospective OR prospectively OR retrospective OR "comparative study" OR "meta-analysis" OR "meta-analyses")) AND (ZZ "journal article")                                                                                                                                                                                                                                                                                                                                                                                                                                                                                                                                                                                                                                                             |
| 5       | #1 AND #2 AND #3 AND #4                                                                                                                                                                                                                                                                                                                                                                                                                                                                                                                                                                                                                                                                                                                                                                                                                                                                                                                                                                                                                                                                                                                                                                                                                                                                                                                                                                                                                                                                                                                                                                                                                                                                                                                                                                                                                                                                                                                                                                                                                                                                                            |
| 6       | #5, since 2009, English                                                                                                                                                                                                                                                                                                                                                                                                                                                                                                                                                                                                                                                                                                                                                                                                                                                                                                                                                                                                                                                                                                                                                                                                                                                                                                                                                                                                                                                                                                                                                                                                                                                                                                                                                                                                                                                                                                                                                                                                                                                                                            |

**SUPPLEMENTAL TABLE 8** Exact Terms for All Searches Considered in the Full AHRQ Report, PsycINFO Search Strategy (November 7, 2016): Key Question 2

| Set No. | Terms                                                                                                                                                                                                                                                                                                                                                                                                                                                                                                                                                                                                                                                                                                                                                                                                                                                                                                                                                                                                                                                                                                                                                                                                                                                                                                                                                                                                                                                                                                                                                                                                                                                                                                                                                                                                                                                                                                                                                                                                                                                                                                                                                                                                                                                                                                                                                                                                                                                                                                                                                                                                                                                                                                                                                                                                                                                                                                                                                                                                                                                                                                                                                                                                                               |
|---------|-------------------------------------------------------------------------------------------------------------------------------------------------------------------------------------------------------------------------------------------------------------------------------------------------------------------------------------------------------------------------------------------------------------------------------------------------------------------------------------------------------------------------------------------------------------------------------------------------------------------------------------------------------------------------------------------------------------------------------------------------------------------------------------------------------------------------------------------------------------------------------------------------------------------------------------------------------------------------------------------------------------------------------------------------------------------------------------------------------------------------------------------------------------------------------------------------------------------------------------------------------------------------------------------------------------------------------------------------------------------------------------------------------------------------------------------------------------------------------------------------------------------------------------------------------------------------------------------------------------------------------------------------------------------------------------------------------------------------------------------------------------------------------------------------------------------------------------------------------------------------------------------------------------------------------------------------------------------------------------------------------------------------------------------------------------------------------------------------------------------------------------------------------------------------------------------------------------------------------------------------------------------------------------------------------------------------------------------------------------------------------------------------------------------------------------------------------------------------------------------------------------------------------------------------------------------------------------------------------------------------------------------------------------------------------------------------------------------------------------------------------------------------------------------------------------------------------------------------------------------------------------------------------------------------------------------------------------------------------------------------------------------------------------------------------------------------------------------------------------------------------------------------------------------------------------------------------------------------------------|
| 1       | DE "Attention Deficit Disorder with Hyperactivity" OR TI ("attention deficit hyperactivity disorder" OR ADHD OR "attention deficit disorder") OR AB ("attention deficit hyperactivity disorder" OR ADHD OR "attention deficit disorder")                                                                                                                                                                                                                                                                                                                                                                                                                                                                                                                                                                                                                                                                                                                                                                                                                                                                                                                                                                                                                                                                                                                                                                                                                                                                                                                                                                                                                                                                                                                                                                                                                                                                                                                                                                                                                                                                                                                                                                                                                                                                                                                                                                                                                                                                                                                                                                                                                                                                                                                                                                                                                                                                                                                                                                                                                                                                                                                                                                                            |
| 2       | AG (childhood OR adolescence) OR DE "Pediatrics" OR TI (child OR children OR infant OR infants OR preschool OR preschooler OR pediatric OR teenager OR teenagers OR teenaged OR teen OR teens OR adolescent OR adolescents OR adolescence OR youth) OR AB (child OR children OR infant OR infants OR preschool OR preschooler OR pediatric OR teenager OR teenagers OR teenaged OR teen OR teens OR adolescent OR adolescents OR adolescence OR youth)                                                                                                                                                                                                                                                                                                                                                                                                                                                                                                                                                                                                                                                                                                                                                                                                                                                                                                                                                                                                                                                                                                                                                                                                                                                                                                                                                                                                                                                                                                                                                                                                                                                                                                                                                                                                                                                                                                                                                                                                                                                                                                                                                                                                                                                                                                                                                                                                                                                                                                                                                                                                                                                                                                                                                                              |
| 3       | #1 AND #2                                                                                                                                                                                                                                                                                                                                                                                                                                                                                                                                                                                                                                                                                                                                                                                                                                                                                                                                                                                                                                                                                                                                                                                                                                                                                                                                                                                                                                                                                                                                                                                                                                                                                                                                                                                                                                                                                                                                                                                                                                                                                                                                                                                                                                                                                                                                                                                                                                                                                                                                                                                                                                                                                                                                                                                                                                                                                                                                                                                                                                                                                                                                                                                                                           |
| 4       | DE "CNS Stimulating Drugs" OR DE "Methylphenidate" OR DE "Dextroamphetamine" OR DE "Amphetamine" OR DE "Clonidine" OR DE "Serotonin Norepinephrine Reuptake Inhibitors" OR DE "Atomoxetine" OR DE "Tricyclic Antidepressant Drugs" OR DE "Desipramine" OR DE "Nortriptyline" OR DE "Bupropion" OR DE "Serotonin Norepinephrine Reuptake Inhibitors" OR DE "Venlafaxine" OR DE "Monoamine Oxidase Inhibitors" OR DE "Amantadine" OR TI (psychostimulants OR "CNS stimulating" OR "Central Nervous System stimulants" OR methylphenidate OR Dexmethylphenidate OR Dextroamphetamine OR lisdexamfetamine OR Amphetamine OR aptensio OR concerta OR Ritalin OR methylin OR medikinet OR equasym OR quillivant OR metadate OR daytrana OR focalin OR Dexedrine OR dextrostat OR procentra OR zenedi OR Adderall OR vyvanse OR elvanse OR tyvense OR dyanavel OR evekeo OR "alpha-2 agonists" OR guanfacine OR intuniv OR tenex OR estulic OR afken OR clonidine OR catapres OR clophelin OR kapvay OR nexiclon OR duraclon OR "Serotonin Norepinephrine Reuptake Inhibitors" OR Strattera OR atomoxetine OR "Tricyclic Antidepressants" OR "Desipramine" OR "Nortriptyline" OR norpramin OR pertofrane OR pamelor OR "dopamine reuptake inhibitors" OR modanifil OR Provigil OR alertec OR modavigil OR modiodal OR modalert OR armodafinil OR nuvigil OR "norepinephrine-dopamine reuptake inhibitors" OR bupropion OR Wellbutrin OR zyban OR forfivo OR "Serotonin Norepinephrine Reuptake Inhibitors" OR duloxetine OR Cymbalta OR "serotonin norepinephrine dopamine reuptake inhibitors" OR "Venlafaxine" OR Effexor OR trevilor OR (Monoamine Oxidase AND Inhibitors) OR selegiline OR eldepryl OR emsam OR selgene OR zelapar OR "n methyl d aspartate receptor agonists" OR "Amantadine" OR symmetrel OR memantine OR Namenda) OR AB (psychostimulants OR "CNS stimulating" OR "Central Nervous System stimulants" OR methylphenidate OR Dexmethylphenidate OR Dextroamphetamine OR lisdexamfetamine OR Amphetamine OR aptensio OR concerta OR Ritalin OR methylin OR medikinet OR equasym OR quillivant OR metadate OR daytrana OR focalin OR Dexedrine OR dextrostat OR procentra OR zenedi OR Adderall OR vyvanse OR elvanse OR tyvense OR dyanavel OR evekeo OR "alpha-2 agonists" OR guanfacine OR intuniv OR tenex OR estulic OR afken OR clonidine OR catapres OR clophelin OR kapvay OR nexiclon OR duraclon OR "Serotonin Norepinephrine Reuptake Inhibitors" OR Strattera OR atomoxetine OR "Tricyclic Antidepressants" OR "Desipramine" OR "Nortriptyline" OR norpramin OR pertofrane OR pamelor OR "dopamine reuptake inhibitors" OR modanifil OR Provigil OR alertec OR modavigil OR modiodal OR modalert OR armodafinil OR nuvigil OR "norepinephrine-dopamine reuptake inhibitors" OR bupropion OR Wellbutrin OR zyban OR forfivo OR "Serotonin Norepinephrine Reuptake Inhibitors" OR duloxetine OR Cymbalta OR "serotonin norepinephrine dopamine reuptake inhibitors" OR "Venlafaxine" OR Effexor OR trevilor OR (Monoamine Oxidase AND Inhibitors) OR selegiline OR eldepryl OR emsam OR selgene OR zelapar OR "n methyl d aspartate receptor agonists" OR "Amantadine" OR symmetrel OR memantine OR Namenda) |

**TABLE 8** Continued

| Set No. | Terms                                                                                                                                                                                                                                                                                                                                                                                                                                                                                                                                                                                                                                                                                                                                                                                                                                                                                                                                                                                                                                                                                                                                                                                                                                                                                                                                                                                                                                                                                                                                                                                                                                                                                                                                                                                                                                                                                                                                                                                                                                                                                                                                                                                                                                                                                                                                                                                                                                                                                                                                                                                                                                                                                                                                                                                                                                                                                                                                                                                                                                                                                                                                                                                                                                                                                                                                                                                                                                                                                                                                                                                                                                                                                                                                                                                                                                                                                                                                                                                                                                                                                                                                                                                                                                                                                                                                                                                                                                                                                                                                                                                                                                                                                                                                                                                                                                                                                                                                                                                                                                                                                                                                                                                                                                                                                                                                                                                                                                                                                                                                                                                                                                                                                                                                                                                                                                                    |
|---------|----------------------------------------------------------------------------------------------------------------------------------------------------------------------------------------------------------------------------------------------------------------------------------------------------------------------------------------------------------------------------------------------------------------------------------------------------------------------------------------------------------------------------------------------------------------------------------------------------------------------------------------------------------------------------------------------------------------------------------------------------------------------------------------------------------------------------------------------------------------------------------------------------------------------------------------------------------------------------------------------------------------------------------------------------------------------------------------------------------------------------------------------------------------------------------------------------------------------------------------------------------------------------------------------------------------------------------------------------------------------------------------------------------------------------------------------------------------------------------------------------------------------------------------------------------------------------------------------------------------------------------------------------------------------------------------------------------------------------------------------------------------------------------------------------------------------------------------------------------------------------------------------------------------------------------------------------------------------------------------------------------------------------------------------------------------------------------------------------------------------------------------------------------------------------------------------------------------------------------------------------------------------------------------------------------------------------------------------------------------------------------------------------------------------------------------------------------------------------------------------------------------------------------------------------------------------------------------------------------------------------------------------------------------------------------------------------------------------------------------------------------------------------------------------------------------------------------------------------------------------------------------------------------------------------------------------------------------------------------------------------------------------------------------------------------------------------------------------------------------------------------------------------------------------------------------------------------------------------------------------------------------------------------------------------------------------------------------------------------------------------------------------------------------------------------------------------------------------------------------------------------------------------------------------------------------------------------------------------------------------------------------------------------------------------------------------------------------------------------------------------------------------------------------------------------------------------------------------------------------------------------------------------------------------------------------------------------------------------------------------------------------------------------------------------------------------------------------------------------------------------------------------------------------------------------------------------------------------------------------------------------------------------------------------------------------------------------------------------------------------------------------------------------------------------------------------------------------------------------------------------------------------------------------------------------------------------------------------------------------------------------------------------------------------------------------------------------------------------------------------------------------------------------------------------------------------------------------------------------------------------------------------------------------------------------------------------------------------------------------------------------------------------------------------------------------------------------------------------------------------------------------------------------------------------------------------------------------------------------------------------------------------------------------------------------------------------------------------------------------------------------------------------------------------------------------------------------------------------------------------------------------------------------------------------------------------------------------------------------------------------------------------------------------------------------------------------------------------------------------------------------------------------------------------------------------------------------------------------------|
| 5       | <p>DE “Psychotherapy” OR DE “Adolescent Psychotherapy” OR DE “Multisystemic Therapy” OR DE “Behavior Therapy” OR DE “Dialectical Behavior Therapy” OR DE “Brief Psychotherapy” OR DE “Child Psychotherapy” OR DE “Play Therapy” OR DE “Client Centered Therapy” OR DE “Cognitive Behavior Therapy” OR DE “Group Psychotherapy” OR DE “Therapeutic Community” OR DE “Integrative Psychotherapy” OR DE “Psychotherapeutic Counseling” OR DE “Family Therapy” OR DE “Supportive Psychotherapy” OR DE “Cognitive Therapy” OR DE “Parent Training” OR DE “Parent Child Relations” OR DE “Time Management” OR DE “Mindfulness” OR DE “School Based Intervention” OR DE “Memory Training” OR DE “Biofeedback Training” OR DE “Biofeedback” OR DE “Computer Assisted Instruction” OR DE “Intelligent Tutoring Systems” OR DE “Diets” OR DE “Dietary Supplements” OR DE “Food Additives” OR DE “Fatty Acids” OR DE “Acupuncture” OR DE “Remedial Education” OR DE “Early Intervention” OR DE “Alternative Medicine” OR TI (“psychosocial therapy” OR “psychosocial intervention” OR “psychosocial interventions” OR “psychosocial approach” OR “psychosocial approaches” OR “psychosocial treatment” OR “psychosocial support” OR “psychoeducation” OR “nonpharmacologic therapy” OR “nondrug therapy” OR “non-drug therapy” OR “Play Therapy” OR “cognitive behavioral therapy” OR “cognitive behavior therapy” OR “cognitive behavioural therapy” OR “cognitive behaviour therapy” OR Mindfulness OR complementary OR “alternative medicine” OR “alternative therapy” OR “alternative therapies” OR “Interpersonal skills training” OR “Parent-Child Interaction Therapy” OR “parent training” OR “parent engagement” OR “parent management” OR “parenting skills” OR “parenting intervention” OR “parenting interventions” OR “Barkley’s defiant child” OR “Teacher-Child Interaction Training” OR “Incredible Years” OR “New Forest Parenting” OR “Triple P” OR “Helping the Noncompliant Child” OR “child life and attention skills” OR “clas” OR PCIT OR “parent child interaction therapy” OR “Summer Treatment Program” OR “Daily Report Card” OR “organization skills” OR “organizational skills” OR “time management” OR “homework intervention” OR braintrain OR “memory training” OR “Captain’s log mindpower builder” OR “memory gyms” OR “attention gym” OR “smartdriver plus” OR “smartmind pro” OR “RoboMemo” OR “play attention” OR metronome OR brainmaster OR mindmed OR “attention lab” OR (activate AND c8) OR “attention training” OR “CogniPlus” OR cogmed OR “working memory training” OR biofeedback OR neurofeedback OR neuroagility OR neurooptimal OR acupuncture OR “vision training” OR “visual training” OR “vision therapy” OR “education intervention” OR “cognitive remediation” OR neurotherapy OR “elimination diet” OR “diet therapy” OR (“low carb” OR “low carbohydrate” OR “low carbohydrates” OR “gluten free”) AND diet OR “feingold diet” OR “red dye” OR (vitamin OR vitamins) AND (supplement OR supplements)) OR “herbal supplement” OR “herbal supplements” OR probiotics OR “omega 3” OR “slow cortical potentials” OR “few foods diet” OR “oligoantigenic diet” OR “restriction diet” OR “food intolerance” OR “food allergy” OR “food allergies” OR “food sensitivity” OR “food sensitivities” OR “multimodal treatment” OR homeopathy OR homeopathic OR chiropractic OR chiropractor) OR AB (“psychosocial therapy” OR “psychosocial intervention” OR “psychosocial interventions” OR “psychosocial approach” OR “psychosocial approaches” OR “psychosocial treatment” OR “psychosocial support” OR “psychoeducation” OR “nonpharmacologic therapy” OR “nondrug therapy” OR “non-drug therapy” OR “Play Therapy” OR “cognitive behavioral therapy” OR “cognitive behavior therapy” OR “cognitive behavioural therapy” OR “cognitive behaviour therapy” OR Mindfulness OR complementary OR “alternative medicine” OR “alternative therapy” OR “alternative therapies” OR “Interpersonal skills training” OR “Parent-Child Interaction Therapy” OR “parent training” OR “parent engagement” OR “parent management” OR “parenting skills” OR “parenting intervention” OR “parenting interventions” OR “Barkley’s defiant child” OR “Teacher-Child Interaction Training” OR “Incredible Years” OR “New Forest Parenting” OR “Triple P” OR “Helping the Noncompliant Child” OR “child life and attention skills” OR “clas” OR PCIT OR “parent child interaction therapy” OR “Summer Treatment Program” OR “Daily Report Card” OR “organization skills” OR “organizational skills” OR “time management” OR “homework intervention” OR braintrain OR “memory training” OR “Captain’s log mindpower builder” OR “memory gyms” OR “attention gym” OR “smartdriver plus” OR “smartmind pro” OR “RoboMemo” OR “play attention” OR metronome OR brainmaster OR mindmed OR “attention lab” OR (activate AND c8) OR “attention training” OR “CogniPlus” OR cogmed OR “working memory training” OR biofeedback OR neurofeedback OR neuroagility OR neurooptimal OR acupuncture OR “vision training” OR “visual training” OR “vision therapy” OR “education intervention” OR “cognitive remediation” OR neurotherapy OR “elimination diet” OR “diet therapy” OR (“low carb” OR “low carbohydrate” OR “low carbohydrates” OR “gluten free”) AND diet OR “feingold diet” OR “red dye” OR (vitamin OR vitamins) AND (supplement OR supplements)) OR “herbal supplement” OR “herbal supplements” OR probiotics OR “omega 3” OR “slow cortical potentials” OR “few foods diet” OR “oligoantigenic diet” OR “restriction diet” OR “food intolerance” OR “food allergy” OR “food allergies” OR “food sensitivity” OR “food sensitivities” OR “multimodal treatment” OR homeopathy OR homeopathic OR chiropractic OR chiropractor)</p> |
| 6       | #4 OR #5                                                                                                                                                                                                                                                                                                                                                                                                                                                                                                                                                                                                                                                                                                                                                                                                                                                                                                                                                                                                                                                                                                                                                                                                                                                                                                                                                                                                                                                                                                                                                                                                                                                                                                                                                                                                                                                                                                                                                                                                                                                                                                                                                                                                                                                                                                                                                                                                                                                                                                                                                                                                                                                                                                                                                                                                                                                                                                                                                                                                                                                                                                                                                                                                                                                                                                                                                                                                                                                                                                                                                                                                                                                                                                                                                                                                                                                                                                                                                                                                                                                                                                                                                                                                                                                                                                                                                                                                                                                                                                                                                                                                                                                                                                                                                                                                                                                                                                                                                                                                                                                                                                                                                                                                                                                                                                                                                                                                                                                                                                                                                                                                                                                                                                                                                                                                                                                 |
| 7       | #3 AND #6                                                                                                                                                                                                                                                                                                                                                                                                                                                                                                                                                                                                                                                                                                                                                                                                                                                                                                                                                                                                                                                                                                                                                                                                                                                                                                                                                                                                                                                                                                                                                                                                                                                                                                                                                                                                                                                                                                                                                                                                                                                                                                                                                                                                                                                                                                                                                                                                                                                                                                                                                                                                                                                                                                                                                                                                                                                                                                                                                                                                                                                                                                                                                                                                                                                                                                                                                                                                                                                                                                                                                                                                                                                                                                                                                                                                                                                                                                                                                                                                                                                                                                                                                                                                                                                                                                                                                                                                                                                                                                                                                                                                                                                                                                                                                                                                                                                                                                                                                                                                                                                                                                                                                                                                                                                                                                                                                                                                                                                                                                                                                                                                                                                                                                                                                                                                                                                |
| 8       | <p>ZC “longitudinal study” OR ZC “empirical study” OR ZC “followup study” OR ZC “longitudinal study” OR ZC “meta analysis” OR ZC “prospective study” OR ZC “retrospective study” OR ZC “systematic review” OR ZC “treatment outcome/clinical trial” OR DE “Clinical Trials” OR DE “Cohort Analysis” OR DE “Followup Studies” OR DE “Longitudinal Studies” OR DE “Prospective Studies” OR DE “Meta Analysis” OR TI (randomized OR randomized OR randomization OR randomization OR randomly OR trial OR groups OR trials OR “evaluation study” OR evaluation studies OR “intervention study” OR “intervention studies” OR “case-control” OR cohort OR longitudinal OR longitudinally OR prospective OR prospectively OR retrospective OR “comparative study” OR “meta-analysis” OR “meta-analyses”) OR AB (randomized OR randomized OR randomization OR randomization OR randomly OR trial OR groups OR trials OR “evaluation study” OR evaluation studies OR “intervention study” OR “intervention studies” OR “case-control” OR cohort OR longitudinal OR longitudinally OR prospective OR prospectively OR retrospective OR “comparative study” OR “meta-analysis” OR “meta-analyses”) AND (ZZ “journal article”)</p>                                                                                                                                                                                                                                                                                                                                                                                                                                                                                                                                                                                                                                                                                                                                                                                                                                                                                                                                                                                                                                                                                                                                                                                                                                                                                                                                                                                                                                                                                                                                                                                                                                                                                                                                                                                                                                                                                                                                                                                                                                                                                                                                                                                                                                                                                                                                                                                                                                                                                                                                                                                                                                                                                                                                                                                                                                                                                                                                                                                                                                                                                                                                                                                                                                                                                                                                                                                                                                                                                                                                                                                                                                                                                                                                                                                                                                                                                                                                                                                                                                                                                                                                                                                                                                                                                                                                                                                                                                                                                                                                                                                                                                   |
| 9       | #7 AND #8                                                                                                                                                                                                                                                                                                                                                                                                                                                                                                                                                                                                                                                                                                                                                                                                                                                                                                                                                                                                                                                                                                                                                                                                                                                                                                                                                                                                                                                                                                                                                                                                                                                                                                                                                                                                                                                                                                                                                                                                                                                                                                                                                                                                                                                                                                                                                                                                                                                                                                                                                                                                                                                                                                                                                                                                                                                                                                                                                                                                                                                                                                                                                                                                                                                                                                                                                                                                                                                                                                                                                                                                                                                                                                                                                                                                                                                                                                                                                                                                                                                                                                                                                                                                                                                                                                                                                                                                                                                                                                                                                                                                                                                                                                                                                                                                                                                                                                                                                                                                                                                                                                                                                                                                                                                                                                                                                                                                                                                                                                                                                                                                                                                                                                                                                                                                                                                |
| 10      | #9, since 2009                                                                                                                                                                                                                                                                                                                                                                                                                                                                                                                                                                                                                                                                                                                                                                                                                                                                                                                                                                                                                                                                                                                                                                                                                                                                                                                                                                                                                                                                                                                                                                                                                                                                                                                                                                                                                                                                                                                                                                                                                                                                                                                                                                                                                                                                                                                                                                                                                                                                                                                                                                                                                                                                                                                                                                                                                                                                                                                                                                                                                                                                                                                                                                                                                                                                                                                                                                                                                                                                                                                                                                                                                                                                                                                                                                                                                                                                                                                                                                                                                                                                                                                                                                                                                                                                                                                                                                                                                                                                                                                                                                                                                                                                                                                                                                                                                                                                                                                                                                                                                                                                                                                                                                                                                                                                                                                                                                                                                                                                                                                                                                                                                                                                                                                                                                                                                                           |



**SUPPLEMENTAL TABLE 9** Exact Terms for All Searches Considered in the Full AHRQ Report, PsycINFO Search Strategy (November 7, 2016): Key Question 3

| Set No. | Terms                                                                                                                                                                                                                                                                                                                                                                                                                                                                                                                                                                                                                                                                                                                                                                                                                                                                                                                                                                                                                                                                                                                                                                                                           |
|---------|-----------------------------------------------------------------------------------------------------------------------------------------------------------------------------------------------------------------------------------------------------------------------------------------------------------------------------------------------------------------------------------------------------------------------------------------------------------------------------------------------------------------------------------------------------------------------------------------------------------------------------------------------------------------------------------------------------------------------------------------------------------------------------------------------------------------------------------------------------------------------------------------------------------------------------------------------------------------------------------------------------------------------------------------------------------------------------------------------------------------------------------------------------------------------------------------------------------------|
| 1       | DE "Attention Deficit Disorder with Hyperactivity" OR TI ("attention deficit hyperactivity disorder" OR ADHD OR "attention deficit disorder") OR AB ("attention deficit hyperactivity disorder" OR ADHD OR "attention deficit disorder")                                                                                                                                                                                                                                                                                                                                                                                                                                                                                                                                                                                                                                                                                                                                                                                                                                                                                                                                                                        |
| 2       | AG (childhood OR adolescence) OR DE "Pediatrics" OR TI (child OR children OR infant OR infants OR preschool OR preschooler OR pediatric OR teenager OR teenagers OR teenaged OR teen OR teens OR adolescent OR adolescents OR adolescence OR youth) OR AB (child OR children OR infant OR infants OR preschool OR preschooler OR pediatric OR teenager OR teenagers OR teenaged OR teen OR teens OR adolescent OR adolescents OR adolescence OR youth)                                                                                                                                                                                                                                                                                                                                                                                                                                                                                                                                                                                                                                                                                                                                                          |
| 3       | ((((DE "Continuum of Care") OR (DE "Outpatient Treatment")) OR (DE "Primary Health Care")) OR (DE "Monitoring")) OR (DE "Community Psychiatry") OR TI ("primary care" OR monitor OR monitored OR monitoring OR "follow up" OR "followed up" OR visit OR visits OR session OR sessions OR appointment OR appointments) OR AB ("primary care" OR monitor OR monitored OR monitoring OR "follow up" OR "followed up" OR visit OR visits OR session OR sessions OR appointment OR appointments)                                                                                                                                                                                                                                                                                                                                                                                                                                                                                                                                                                                                                                                                                                                     |
| 4       | ZC "longitudinal study" OR ZC "empirical study" OR ZC "followup study" OR ZC "longitudinal study" OR ZC "meta analysis" OR ZC "prospective study" OR ZC "retrospective study" OR ZC "systematic review" OR ZC "treatment outcome/clinical trial" OR DE "Clinical Trials" OR DE "Cohort Analysis" OR DE "Followup Studies" OR DE "Longitudinal Studies" OR DE "Prospective Studies" OR DE "Meta Analysis" OR TI (randomized OR randomized OR randomization OR randomization OR randomly OR trial OR groups OR trials OR "evaluation study" OR evaluation studies OR "intervention study" OR "intervention studies" OR "case-control" OR cohort OR longitudinal OR longitudinally OR prospective OR prospectively OR retrospective OR "comparative study" OR "meta-analysis" OR "meta-analyses") OR AB (randomized OR randomized OR randomization OR randomization OR randomly OR trial OR groups OR trials OR "evaluation study" OR evaluation studies OR "intervention study" OR "intervention studies" OR "case-control" OR cohort OR longitudinal OR longitudinally OR prospective OR prospectively OR retrospective OR "comparative study" OR "meta-analysis" OR "meta-analyses") AND (ZZ "journal article") |
| 5       | #1 AND #2 AND #3 AND #4                                                                                                                                                                                                                                                                                                                                                                                                                                                                                                                                                                                                                                                                                                                                                                                                                                                                                                                                                                                                                                                                                                                                                                                         |
| 6       | #5, since 2009 and English                                                                                                                                                                                                                                                                                                                                                                                                                                                                                                                                                                                                                                                                                                                                                                                                                                                                                                                                                                                                                                                                                                                                                                                      |

**SUPPLEMENTAL TABLE 10** Exact Terms for All Searches Considered in the Full AHRQ Report, Cochrane Search Strategy (November 7, 2016), Platform: Wiley, and Database Searched: Cochrane Database of Systematic Reviews: Key Question 1

| Set No. | Terms                                                                                                                                                                                                                                                                                                                                                                                                                                                                                                                                                                                                                                                                                                                                                                                                                                                                                                                                                                                                                                                                                                  |
|---------|--------------------------------------------------------------------------------------------------------------------------------------------------------------------------------------------------------------------------------------------------------------------------------------------------------------------------------------------------------------------------------------------------------------------------------------------------------------------------------------------------------------------------------------------------------------------------------------------------------------------------------------------------------------------------------------------------------------------------------------------------------------------------------------------------------------------------------------------------------------------------------------------------------------------------------------------------------------------------------------------------------------------------------------------------------------------------------------------------------|
| 1       | [mh "Attention Deficit Disorder with Hyperactivity"]                                                                                                                                                                                                                                                                                                                                                                                                                                                                                                                                                                                                                                                                                                                                                                                                                                                                                                                                                                                                                                                   |
| 2       | "attention deficit hyperactivity disorder":ab,ti OR "ADHD":ab,ti OR "attention deficit disorder":ab,ti                                                                                                                                                                                                                                                                                                                                                                                                                                                                                                                                                                                                                                                                                                                                                                                                                                                                                                                                                                                                 |
| 3       | #1 OR #2                                                                                                                                                                                                                                                                                                                                                                                                                                                                                                                                                                                                                                                                                                                                                                                                                                                                                                                                                                                                                                                                                               |
| 4       | [mh Pediatrics] OR [mh Adolescent] OR [mh Infant] OR [mh Child]                                                                                                                                                                                                                                                                                                                                                                                                                                                                                                                                                                                                                                                                                                                                                                                                                                                                                                                                                                                                                                        |
| 5       | child:ab,ti OR children:ab,ti OR infant:ab,ti OR infants:ab,ti OR preschool:ab,ti OR preschooler:ab,ti OR pediatric:ab,ti OR teenager:ab,ti OR teenagers:ab,ti OR teenaged:ab,ti OR teen:ab,ti OR teens:ab,ti OR adolescent:ab,ti OR adolescents:ab,ti OR adolescence:ab,ti OR youth:ab,ti                                                                                                                                                                                                                                                                                                                                                                                                                                                                                                                                                                                                                                                                                                                                                                                                             |
| 6       | #4 OR #5                                                                                                                                                                                                                                                                                                                                                                                                                                                                                                                                                                                                                                                                                                                                                                                                                                                                                                                                                                                                                                                                                               |
| 7       | [mh "Attention Deficit Disorder with Hyperactivity"/DI] OR [mh "mass screening"] OR [mh questionnaires] OR [mh "Interviews as Topic"] OR [mh Psychometrics] OR [mh "Psychiatric Status Rating Scales"] OR [mh ^diagnosis] OR [mh "Diagnostic Techniques and Procedures"] OR [mh "Diagnostic and Statistical Manual of Mental Disorders"] OR [mh "Referral and Consultation"]                                                                                                                                                                                                                                                                                                                                                                                                                                                                                                                                                                                                                                                                                                                           |
| 8       | questionnaire:ab,ti OR questionnaires:ab,ti OR screening:ab,ti OR screen:ab,ti OR scale:ab,ti OR instrument:ab,ti OR instruments:ab,ti OR interview:ab,ti OR interviews:ab,ti OR DSM*:ab,ti OR diagnosis:ab,ti OR diagnostic:ab,ti OR diagnosed:ab,ti OR (Vanderbilt:ab,ti AND scale:ab,ti) OR conners:ab,ti OR cprs:ab,ti OR ctrs:ab,ti OR cprs:ab,ti OR crs:ab,ti OR "snap-IV":ab,ti OR "snap-4":ab,ti OR "bas-2":ab,ti OR "behavioral assessment system for children":ab,ti OR dbdrs:ab,ti OR "disruptive behavior disorder rating scale":ab,ti OR adhd-rs:ab,ti OR "adhd rating scale":ab,ti OR ksads:ab,ti OR k-sads:ab,ti OR kiddie-sads:ab,ti OR DISC:ab,ti OR "dominance inducement submission and compliance":ab,ti OR "diagnostic interview schedule for children":ab,ti OR "diagnostic inventory for screening children":ab,ti OR "mini-kid":ab,ti OR "Mini Interational Neuropsychiatric interview":ab,ti OR "iva-2":ab,ti OR "iva-qs":ab,ti OR "iva-ae2":ab,ti OR tova:ab,ti OR "test of variables of attention":ab,ti OR "neuropsychiatric eeg-based assessment aid":ab,ti OR neba:ab,ti |
| 9       | #7 OR #8                                                                                                                                                                                                                                                                                                                                                                                                                                                                                                                                                                                                                                                                                                                                                                                                                                                                                                                                                                                                                                                                                               |
| 10      | #3 AND #6 AND #9                                                                                                                                                                                                                                                                                                                                                                                                                                                                                                                                                                                                                                                                                                                                                                                                                                                                                                                                                                                                                                                                                       |
| 11      | #10, since 2009, in CDSR only                                                                                                                                                                                                                                                                                                                                                                                                                                                                                                                                                                                                                                                                                                                                                                                                                                                                                                                                                                                                                                                                          |

CDSR, Cochrane Database of Systematic Reviews.

**SUPPLEMENTAL TABLE 11** Exact Terms for All Searches Considered in the Full AHRQ Report, Cochrane Search Strategy (November 7, 2016), Platform: Wiley, and Database Searched: Cochrane Database of Systematic Reviews: Key Question 2

| Set No. | Terms                                                                                                                                                                                                                                                                                                                                                                                                                                                                                                                                                                                                                                                                                                                                                                                                                                                                                                                                                                                                                                                                                                                                                                                                                                                                                                                                                                                                                                                                                                                                                                                                                                                                                                                                                                                                                                                                                                                                                                                                                                                                                                                                                                                                                                                                                                                                                                                                                                                                                                                                                                                                                                                                                                                                                                                                                                                                                                                                                                                                                                                     |
|---------|-----------------------------------------------------------------------------------------------------------------------------------------------------------------------------------------------------------------------------------------------------------------------------------------------------------------------------------------------------------------------------------------------------------------------------------------------------------------------------------------------------------------------------------------------------------------------------------------------------------------------------------------------------------------------------------------------------------------------------------------------------------------------------------------------------------------------------------------------------------------------------------------------------------------------------------------------------------------------------------------------------------------------------------------------------------------------------------------------------------------------------------------------------------------------------------------------------------------------------------------------------------------------------------------------------------------------------------------------------------------------------------------------------------------------------------------------------------------------------------------------------------------------------------------------------------------------------------------------------------------------------------------------------------------------------------------------------------------------------------------------------------------------------------------------------------------------------------------------------------------------------------------------------------------------------------------------------------------------------------------------------------------------------------------------------------------------------------------------------------------------------------------------------------------------------------------------------------------------------------------------------------------------------------------------------------------------------------------------------------------------------------------------------------------------------------------------------------------------------------------------------------------------------------------------------------------------------------------------------------------------------------------------------------------------------------------------------------------------------------------------------------------------------------------------------------------------------------------------------------------------------------------------------------------------------------------------------------------------------------------------------------------------------------------------------------|
| 1       | [mh "Attention Deficit Disorder with Hyperactivity"]                                                                                                                                                                                                                                                                                                                                                                                                                                                                                                                                                                                                                                                                                                                                                                                                                                                                                                                                                                                                                                                                                                                                                                                                                                                                                                                                                                                                                                                                                                                                                                                                                                                                                                                                                                                                                                                                                                                                                                                                                                                                                                                                                                                                                                                                                                                                                                                                                                                                                                                                                                                                                                                                                                                                                                                                                                                                                                                                                                                                      |
| 2       | "attention deficit hyperactivity disorder":ab,ti OR "ADHD":ab,ti OR "attention deficit disorder":ab,ti                                                                                                                                                                                                                                                                                                                                                                                                                                                                                                                                                                                                                                                                                                                                                                                                                                                                                                                                                                                                                                                                                                                                                                                                                                                                                                                                                                                                                                                                                                                                                                                                                                                                                                                                                                                                                                                                                                                                                                                                                                                                                                                                                                                                                                                                                                                                                                                                                                                                                                                                                                                                                                                                                                                                                                                                                                                                                                                                                    |
| 3       | #1 OR #2                                                                                                                                                                                                                                                                                                                                                                                                                                                                                                                                                                                                                                                                                                                                                                                                                                                                                                                                                                                                                                                                                                                                                                                                                                                                                                                                                                                                                                                                                                                                                                                                                                                                                                                                                                                                                                                                                                                                                                                                                                                                                                                                                                                                                                                                                                                                                                                                                                                                                                                                                                                                                                                                                                                                                                                                                                                                                                                                                                                                                                                  |
| 4       | [mh Pediatrics] OR [mh Adolescent] OR [mh Infant] OR [mh Child]                                                                                                                                                                                                                                                                                                                                                                                                                                                                                                                                                                                                                                                                                                                                                                                                                                                                                                                                                                                                                                                                                                                                                                                                                                                                                                                                                                                                                                                                                                                                                                                                                                                                                                                                                                                                                                                                                                                                                                                                                                                                                                                                                                                                                                                                                                                                                                                                                                                                                                                                                                                                                                                                                                                                                                                                                                                                                                                                                                                           |
| 5       | child:ab,ti OR children:ab,ti OR infant:ab,ti OR infants:ab,ti OR preschool:ab,ti OR preschooler:ab,ti OR pediatric:ab,ti OR teenager:ab,ti OR teenagers:ab,ti OR teenaged:ab,ti OR teen:ab,ti OR teens:ab,ti OR adolescent:ab,ti OR adolescents:ab,ti OR adolescence:ab,ti OR youth:ab,ti                                                                                                                                                                                                                                                                                                                                                                                                                                                                                                                                                                                                                                                                                                                                                                                                                                                                                                                                                                                                                                                                                                                                                                                                                                                                                                                                                                                                                                                                                                                                                                                                                                                                                                                                                                                                                                                                                                                                                                                                                                                                                                                                                                                                                                                                                                                                                                                                                                                                                                                                                                                                                                                                                                                                                                |
| 6       | #4 OR #5                                                                                                                                                                                                                                                                                                                                                                                                                                                                                                                                                                                                                                                                                                                                                                                                                                                                                                                                                                                                                                                                                                                                                                                                                                                                                                                                                                                                                                                                                                                                                                                                                                                                                                                                                                                                                                                                                                                                                                                                                                                                                                                                                                                                                                                                                                                                                                                                                                                                                                                                                                                                                                                                                                                                                                                                                                                                                                                                                                                                                                                  |
| 7       | [mh "Attention Deficit Disorder with Hyperactivity"/DT] OR [mh "Central Nervous System Stimulants"] OR [mh Methylphenidate] OR [mh Dexmethylphenidate] OR [mh Dextroamphetamine] OR [mh Amphetamine] OR [mh Guanfacine] OR [mh Sympatholytics] OR [mh Clonidine] OR [mh "Adrenergic Uptake Inhibitors"] OR [mh "alpha-2 Adrenergic Receptors"] OR [mh "Adrenergic alpha-Agonists"] OR [mh "Adrenergic alpha-2 Receptor Agonists"] OR [mh "Tricyclic Antidepressive Agents"] OR [mh Desipramine] OR [mh "Dopamine Uptake Inhibitors"] OR [mh Sympathomimetics] OR [mh "Serotonin Uptake Inhibitors"] OR [mh "Monoamine Oxidase Inhibitors"] OR [mh "Monoamine Oxidase"] OR [mh Selegiline] OR [mh Bupropion] OR [mh "N-Methyl-D-Aspartate Receptors"] OR [mh Memantine] OR [mh Amantadine]                                                                                                                                                                                                                                                                                                                                                                                                                                                                                                                                                                                                                                                                                                                                                                                                                                                                                                                                                                                                                                                                                                                                                                                                                                                                                                                                                                                                                                                                                                                                                                                                                                                                                                                                                                                                                                                                                                                                                                                                                                                                                                                                                                                                                                                                 |
| 8       | "Central Nervous System Stimulants":ab,ti OR "psychostimulant":ab,ti OR "Methylphenidate":ab,ti OR "Methylphenidate Hydrochloride":ab,ti OR "Aptensio":ab,ti OR "Concerta":ab,ti OR "Ritalin":ab,ti OR "Ritalin LA":ab,ti OR "Medikinet":ab,ti OR "Equasym":ab,ti OR "Quillivant":ab,ti OR "Metadate":ab,ti OR "Daytrana":ab,ti OR "Dexmethylphenidate":ab,ti OR "Dexmethylphenidate Hydrochloride":ab,ti OR "Focalin":ab,ti OR "Dextroamphetamine":ab,ti OR "Dexedrine":ab,ti OR "Dextrostat":ab,ti OR "ProCentra":ab,ti OR "Zenzedi":ab,ti OR "mixed amphetamine salts":ab,ti OR "Adderall":ab,ti OR "lisdexamfetamine":ab,ti OR "lisdexamfetamine dimesylate":ab,ti OR "Vyvanse":ab,ti OR "Venvanse":ab,ti OR "Elvanse":ab,ti OR "Tyvense":ab,ti OR "Dyanavel":ab,ti OR "Evekeo":ab,ti OR "Guanfacine":ab,ti OR "Sympatholytics":ab,ti OR "Central alpha-2 Adrenergic Agonist":ab,ti OR "Clonidine":ab,ti OR "Intuniv":ab,ti OR "Estulic":ab,ti OR "Tenex":ab,ti OR "Catapres":ab,ti OR "Clophelin":ab,ti OR "Kapvay":ab,ti OR "Nexiclon":ab,ti OR "Duraclon":ab,ti OR "Norepinephrine Reuptake Inhibitors":ab,ti OR "Selective Norepinephrine Reuptake Inhibitors":ab,ti OR "Adrenergic Uptake Inhibitors":ab,ti OR "atomoxetine":ab,ti OR "Strattera":ab,ti OR "Tricyclic antidepressants":ab,ti OR "Desipramine":ab,ti OR "Norpramin":ab,ti OR "Nortriptyline":ab,ti OR "Pamelor":ab,ti OR "Dopamine Reuptake Inhibitors":ab,ti OR "modafinil":ab,ti OR "Provigil":ab,ti OR "Armodafinil":ab,ti OR "Norepinephrine-dopamine Reuptake Inhibitors":ab,ti OR "Bupropion":ab,ti OR "Wellbutrin":ab,ti OR "Forfivo":ab,ti OR "Cymbalta":ab,ti OR "venlafaxine":ab,ti OR "reboxetine":ab,ti OR "Monoamine Oxidase Type B inhibitors":ab,ti OR "Selegiline":ab,ti OR "Eldepryl":ab,ti OR "Zelapar":ab,ti OR "NMDA receptors":ab,ti OR "N-Methyl-D-aspartate receptor Antagonists":ab,ti OR "Amantadine":ab,ti OR "Memantine":ab,ti OR "Pertofrane":ab,ti OR "Nuvigil":ab,ti OR "Cymbalta":ab,ti OR "duloxetine":ab,ti OR "Effexor":ab,ti OR "Eldepryl":ab,ti OR "Emsam":ab,ti OR "Trevilor":ab,ti OR "Symmetrel":ab,ti OR "Namenda":ab,ti OR "Zelapar":ab,ti                                                                                                                                                                                                                                                                                                                                                                                                                                                                                                                                                                                                                                                                                                                                                                                                                                                                                               |
| 9       | #7 OR #8                                                                                                                                                                                                                                                                                                                                                                                                                                                                                                                                                                                                                                                                                                                                                                                                                                                                                                                                                                                                                                                                                                                                                                                                                                                                                                                                                                                                                                                                                                                                                                                                                                                                                                                                                                                                                                                                                                                                                                                                                                                                                                                                                                                                                                                                                                                                                                                                                                                                                                                                                                                                                                                                                                                                                                                                                                                                                                                                                                                                                                                  |
| 10      | [mh "Attention Deficit Disorder with Hyperactivity"/DH] OR [mh "Attention Deficit Disorder with Hyperactivity"/RH] OR [mh Psychotherapy] OR [mh "Behavior Therapy"] OR [mh "Parent-Child Relations"] OR [mh "Play Therapy"] OR [mh "Cognitive Therapy"] OR [mh "Time Management"] OR [mh "Computer-Assisted Instruction"] OR [mh "Diet Therapy"] OR [mh "Omega-3 Fatty Acids"/TU] OR [mh Vitamins/AD] OR [mh Vitamins/TU] OR [mh "Food Additives"/AE] OR [mh Probiotics/TU] OR [mh "Acupuncture Therapy"] OR [mh "Remedial Teaching"] OR [mh "Early Intervention (Education)"] OR [mh "Complementary Therapies"] OR [mh "Combined Modality Therapy"]                                                                                                                                                                                                                                                                                                                                                                                                                                                                                                                                                                                                                                                                                                                                                                                                                                                                                                                                                                                                                                                                                                                                                                                                                                                                                                                                                                                                                                                                                                                                                                                                                                                                                                                                                                                                                                                                                                                                                                                                                                                                                                                                                                                                                                                                                                                                                                                                      |
| 11      | "psychosocial therapy":ab,ti OR "psychosocial intervention":ab,ti OR "psychosocial interventions":ab,ti OR "psychosocial approach":ab,ti OR "psychosocial approaches":ab,ti OR "psychosocial treatment":ab,ti OR "psychosocial support":ab,ti OR "psychoeducation":ab,ti OR "nonpharmacologic therapy":ab,ti OR "nondrug therapy":ab,ti OR "non-drug therapy":ab,ti OR "Play Therapy":ab,ti OR "cognitive behavioral therapy":ab,ti OR "cognitive behavior therapy":ab,ti OR "cognitive behavioural therapy":ab,ti OR "cognitive behaviour therapy":ab,ti OR "Mindfulness":ab,ti OR "complementary":ab,ti OR "alternative medicine":ab,ti OR "alternative therapy":ab,ti OR "alternative therapies":ab,ti OR "interpersonal skills training":ab,ti OR "Parent-Child Interaction Therapy":ab,ti OR "parent training":ab,ti OR "parent engagement":ab,ti OR "parent management":ab,ti OR "parenting skills":ab,ti OR "parenting intervention":ab,ti OR "parenting interventions":ab,ti OR "Barkley's defiant child":ab,ti OR "Teacher-Child Interaction Training":ab,ti OR "Incredible Years":ab,ti OR "New Forest Parenting":ab,ti OR "Triple P":ab,ti OR "Helping the Noncompliant Child":ab,ti OR "child life and attention skills":ab,ti OR "clas":ab,ti OR PCIT:ab,ti OR "parent child interaction therapy":ab,ti OR "Summer Treatment Program":ab,ti OR "Daily Report Card":ab,ti OR "organization skills":ab,ti OR "organizational skills":ab,ti OR "time management":ab,ti OR "homework intervention":ab,ti OR braintrain:ab,ti OR "memory training":ab,ti OR "Captain's log mindpower builder":ab,ti OR "memory gyms":ab,ti OR "attention gym":ab,ti OR "smartdriver plus":ab,ti OR "smartmind pro":ab,ti OR "RoboMemo":ab,ti OR "play attention":ab,ti OR metronome:ab,ti OR brainmaster:ab,ti OR mindmed:ab,ti OR "attention lab":ab,ti OR (activate:ab,ti AND c8:ab,ti) OR "attention training":ab,ti OR "CogniPlus":ab,ti OR cogmed:ab,ti OR "working memory training":ab,ti OR biofeedback:ab,ti OR neurofeedback:ab,ti OR neuroagility:ab,ti OR neuroptimal:ab,ti OR acupuncture:ab,ti OR "vision training":ab,ti OR "visual training":ab,ti OR "vision therapy":ab,ti OR "education intervention":ab,ti OR "cognitive remediation":ab,ti OR neurotherapy:ab,ti OR "elimination diet":ab,ti OR "diet therapy":ab,ti OR ("low carb" OR "low carbohydrate" OR "low carbohydrates":ab,ti OR "gluten free") AND diet:ab,ti) OR "feingold diet":ab,ti OR "red dye":ab,ti OR (vitamin:ab,ti OR vitamins:ab,ti) AND (supplement:ab,ti OR supplements:ab,ti) OR "herbal supplement":ab,ti OR "herbal supplements":ab,ti OR probiotics:ab,ti OR "omega 3":ab,ti OR "slow cortical potentials":ab,ti OR "few foods diet":ab,ti OR "oligoantigenic diet":ab,ti OR "restriction diet":ab,ti OR "food intolerance":ab,ti OR "food allergy":ab,ti OR "food allergies":ab,ti OR "food sensitivity":ab,ti OR "food sensitivities":ab,ti OR "multimodal treatment":ab,ti OR homeopathy:ab,ti OR homeopathic:ab,ti OR chiropractic:ab,ti OR chiropractor:ab,ti |
| 12      | #10 OR #11                                                                                                                                                                                                                                                                                                                                                                                                                                                                                                                                                                                                                                                                                                                                                                                                                                                                                                                                                                                                                                                                                                                                                                                                                                                                                                                                                                                                                                                                                                                                                                                                                                                                                                                                                                                                                                                                                                                                                                                                                                                                                                                                                                                                                                                                                                                                                                                                                                                                                                                                                                                                                                                                                                                                                                                                                                                                                                                                                                                                                                                |
| 13      | #12 OR #9                                                                                                                                                                                                                                                                                                                                                                                                                                                                                                                                                                                                                                                                                                                                                                                                                                                                                                                                                                                                                                                                                                                                                                                                                                                                                                                                                                                                                                                                                                                                                                                                                                                                                                                                                                                                                                                                                                                                                                                                                                                                                                                                                                                                                                                                                                                                                                                                                                                                                                                                                                                                                                                                                                                                                                                                                                                                                                                                                                                                                                                 |
| 14      | #3 AND #6 AND #13                                                                                                                                                                                                                                                                                                                                                                                                                                                                                                                                                                                                                                                                                                                                                                                                                                                                                                                                                                                                                                                                                                                                                                                                                                                                                                                                                                                                                                                                                                                                                                                                                                                                                                                                                                                                                                                                                                                                                                                                                                                                                                                                                                                                                                                                                                                                                                                                                                                                                                                                                                                                                                                                                                                                                                                                                                                                                                                                                                                                                                         |
| 15      | #14, since 2009, limited to CDSR                                                                                                                                                                                                                                                                                                                                                                                                                                                                                                                                                                                                                                                                                                                                                                                                                                                                                                                                                                                                                                                                                                                                                                                                                                                                                                                                                                                                                                                                                                                                                                                                                                                                                                                                                                                                                                                                                                                                                                                                                                                                                                                                                                                                                                                                                                                                                                                                                                                                                                                                                                                                                                                                                                                                                                                                                                                                                                                                                                                                                          |

CDSR, Cochrane Database of Systematic Reviews.

**SUPPLEMENTAL TABLE 12** Exact Terms for All Searches Considered in the Full AHRQ Report, Cochrane Search Strategy (November 7, 2016), Platform: Wiley, and Database Searched: Cochrane Database of Systematic Reviews: Key Question 3

| Set No. | Terms                                                                                                                                                                                                                                                                                      |
|---------|--------------------------------------------------------------------------------------------------------------------------------------------------------------------------------------------------------------------------------------------------------------------------------------------|
| 1       | [mh "Attention Deficit Disorder with Hyperactivity"]                                                                                                                                                                                                                                       |
| 2       | "attention deficit hyperactivity disorder":ab,ti OR "ADHD":ab,ti OR "attention deficit disorder":ab,ti                                                                                                                                                                                     |
| 3       | #1 OR #2                                                                                                                                                                                                                                                                                   |
| 4       | [mh Pediatrics] OR [mh Adolescent] OR [mh Infant] OR [mh Child]                                                                                                                                                                                                                            |
| 5       | child:ab,ti OR children:ab,ti OR infant:ab,ti OR infants:ab,ti OR preschool:ab,ti OR preschooler:ab,ti OR pediatric:ab,ti OR teenager:ab,ti OR teenagers:ab,ti OR teenaged:ab,ti OR teen:ab,ti OR teens:ab,ti OR adolescent:ab,ti OR adolescents:ab,ti OR adolescence:ab,ti OR youth:ab,ti |
| 6       | #4 OR #5                                                                                                                                                                                                                                                                                   |
| 7       | [mh "Secondary Care"] OR [mh "Comprehensive Health Care"]                                                                                                                                                                                                                                  |
| 8       | "primary care":ab,ti OR monitor:ab,ti OR monitored:ab,ti OR monitoring:ab,ti OR "follow up":ab,ti OR "followed up":ab,ti OR visit:ab,ti OR visits:ab,ti OR session:ab,ti OR sessions:ab,ti OR appointment:ab,ti OR appointments:ab,ti                                                      |
| 9       | #7 OR #8                                                                                                                                                                                                                                                                                   |
| 10      | #3 AND #6 AND #9                                                                                                                                                                                                                                                                           |
| 11      | #10, since 2009, limit to CDSR                                                                                                                                                                                                                                                             |

CDSR, Cochrane Database of Systematic Reviews.

**SUPPLEMENTAL TABLE 13** Exact Terms for All Searches Considered in the Full AHRQ Report, Gray Literature Searches: ClinicalTrials.gov (November 28, 2016)

|               |                             |
|---------------|-----------------------------|
| Conditions    | ADHD OR "attention deficit" |
| Recruitment   | Completed studies           |
| Study results | All studies                 |
| Study type    | Interventional studies      |
| Age group     | Child                       |
| Phase         | Phase 2, Phase 3, Phase 4   |

Total number of results for screening: 377.

**SUPPLEMENTAL TABLE 14** Exact Terms for All Searches Considered in the Full AHRQ Report, World Health Organization: International Clinical Trials Registry Platform Search Portal (November 28, 2016)

|                   |                             |
|-------------------|-----------------------------|
| Conditions        | ADHD OR "attention deficit" |
| Recruiting status | All                         |

**SUPPLEMENTAL TABLE 15** Exact Terms for All Searches Considered in the Full AHRQ Report, National Guidelines Clearinghouse (November 28, 2016): Platform: www.guideline.gov

|                          |                                                                                    |
|--------------------------|------------------------------------------------------------------------------------|
| Keywords                 | ADHD OR "attention deficit disorder" OR "attention deficit hyperactivity disorder" |
| Age of target population | Adolescent (13–18 y), child (2–12 y), infant (1–23 mo), infant, newborn (to 1 mo)  |
| Publication y            | 2009, 2010, 2011, 2012, 2013, 2014, 2015                                           |

Total number of results: 37.

**SUPPLEMENTAL TABLE 16** Inclusion and Exclusion Criteria for All Key Questions Considered in the Full AHRQ Report

| PICOTS Element | Inclusion Criteria                                                                                                                                                                                                                                                                                                                                                                                                                                                                                                                                                                                                                                                                                                                                                                                                                                                                                                                                                                                                                                                                                                                                                                                                                                                                                                                                                                                                                                                                                                                                                                                                                                                                                                                                                                                                                                                                                                                                                                                                | Exclusion Criteria                                                                                                                                                                                                                                                                                                                                                                                                                                                                           |
|----------------|-------------------------------------------------------------------------------------------------------------------------------------------------------------------------------------------------------------------------------------------------------------------------------------------------------------------------------------------------------------------------------------------------------------------------------------------------------------------------------------------------------------------------------------------------------------------------------------------------------------------------------------------------------------------------------------------------------------------------------------------------------------------------------------------------------------------------------------------------------------------------------------------------------------------------------------------------------------------------------------------------------------------------------------------------------------------------------------------------------------------------------------------------------------------------------------------------------------------------------------------------------------------------------------------------------------------------------------------------------------------------------------------------------------------------------------------------------------------------------------------------------------------------------------------------------------------------------------------------------------------------------------------------------------------------------------------------------------------------------------------------------------------------------------------------------------------------------------------------------------------------------------------------------------------------------------------------------------------------------------------------------------------|----------------------------------------------------------------------------------------------------------------------------------------------------------------------------------------------------------------------------------------------------------------------------------------------------------------------------------------------------------------------------------------------------------------------------------------------------------------------------------------------|
| Populations    | <p>KQ 1: individuals birth through 17 y of age without the diagnosis of ADHD, divided by subquestion as follows</p> <p>KQ 1a considers the initial diagnosis of individuals under 7 y of age</p> <p>KQ 1b considers the initial diagnosis of individuals through 17 y of age using EEG, imaging, or executive function approaches</p> <p>KQs 1c and 1d consider both populations</p> <p>KQ 2: individuals birth through 17 y of age with a diagnosis of ADHD</p> <p>KQ 3: individuals birth through 17 y of age who have previously begun treatment of ADHD</p> <p>Subgroups of interest for KQs 1–3</p> <p>The general population of children and adolescents: ages &lt;4, 4–6, 7–12, and 13–17 y</p> <p>When data are available, findings are separately evaluated by sex or specific risk factors (prenatal tobacco, alcohol, or substance abuse; prematurity or low birth wt; and family history); ADHD presentation; comorbidity; race and/or ethnicity; socioeconomic status; insurance status; geographic location</p>                                                                                                                                                                                                                                                                                                                                                                                                                                                                                                                                                                                                                                                                                                                                                                                                                                                                                                                                                                                     | <p>Individuals 18 y of age or older. Note that studies with individuals &gt;18 y of age are included as long as findings are reported separately for individuals ≤18 y, or if the mean patient age plus the SD is not &gt;21 y of age. Also note that for long-term studies, the age of the individuals may be &gt;18, but these studies are only considered for inclusion if the age at enrollment in the study was ≤18 y.</p> <p>Administrative claims data used for diagnosis of ADHD</p> |
| Interventions  | <p>KQ 1: any standard ADHD diagnostic strategy, including clinician interview or standardized instrument (eg, Vanderbilt scales, the Conner scales, and the SNAP-IV rating score) for individuals &lt;7 y of age. The use of EEG-based systems, imaging, or assessment of executive function were evaluated in the diagnosis of ADHD in individuals through 17 y of age.</p> <p>KQ 2: any pharmacologic or nonpharmacologic treatment of ADHD, alone or in combination</p> <p>Pharmacologic treatments considered are brand name and generic formulations of the following medications<sup>a</sup>:</p> <p>Psychostimulants</p> <ul style="list-style-type: none"> <li>Methylphenidate (MPH)</li> <li>Dexmethylphenidate (D-TMP)</li> <li>Dextroamphetamine (DEX)</li> <li>Lisdexamfetamine (LDX)</li> <li>Mixed amphetamine salts (MAS)</li> <li>Amphetamine</li> </ul> <p>Tricyclic antidepressants</p> <ul style="list-style-type: none"> <li>*Desipramine</li> <li>*Nortriptyline</li> </ul> <p>Selective norepinephrine reuptake inhibitors</p> <ul style="list-style-type: none"> <li>Atomoxetine (ATX)</li> </ul> <p>Alpha-2 agonists</p> <ul style="list-style-type: none"> <li>Clonidine</li> <li>Guanfacine extended release (GXR)</li> <li>*Guanfacine immediate release (GIR)</li> </ul> <p>Dopamine reuptake inhibitors</p> <ul style="list-style-type: none"> <li>*Modafinil</li> <li>*Armodafinil</li> </ul> <p>Norepinephrine-dopamine reuptake inhibitors</p> <ul style="list-style-type: none"> <li>*Bupropion</li> </ul> <p>Serotonin-norepinephrine reuptake inhibitors</p> <ul style="list-style-type: none"> <li>*Duloxetine</li> </ul> <p>Serotonin-norepinephrine-dopamine reuptake inhibitors</p> <ul style="list-style-type: none"> <li>*Venlafaxine</li> </ul> <p>Monoamine oxidase type B inhibitors</p> <ul style="list-style-type: none"> <li>*Selegiline</li> </ul> <p>N-methyl-D-aspartate receptor antagonists</p> <ul style="list-style-type: none"> <li>*Amantadine</li> </ul> | <p>KQ 1: validation studies or diagnosis conducted by using a nonvalidated instrument</p> <p>KQ 2: studies in which pharmacologic agents approved by the FDA for the treatment of ADHD are compared and that have enrollment of &lt;100 patients with ADHD, or &lt;6 mo of follow-up</p>                                                                                                                                                                                                     |

TABLE 16 Continued

| PICOTS Element | Inclusion Criteria                                                                                                                                                                                                                                                                                                                                                                                                                                                                                                                                                                                                                                                                                                                                                                                                                                                                                                                                                                                                                                                                                                                                                                                                                                                                                                                                                                                                                                                                                                                                                                                                                                                                                                                                                                                                                                                                                                                                                                                                                                                                     | Exclusion Criteria                                             |
|----------------|----------------------------------------------------------------------------------------------------------------------------------------------------------------------------------------------------------------------------------------------------------------------------------------------------------------------------------------------------------------------------------------------------------------------------------------------------------------------------------------------------------------------------------------------------------------------------------------------------------------------------------------------------------------------------------------------------------------------------------------------------------------------------------------------------------------------------------------------------------------------------------------------------------------------------------------------------------------------------------------------------------------------------------------------------------------------------------------------------------------------------------------------------------------------------------------------------------------------------------------------------------------------------------------------------------------------------------------------------------------------------------------------------------------------------------------------------------------------------------------------------------------------------------------------------------------------------------------------------------------------------------------------------------------------------------------------------------------------------------------------------------------------------------------------------------------------------------------------------------------------------------------------------------------------------------------------------------------------------------------------------------------------------------------------------------------------------------------|----------------------------------------------------------------|
|                | <p>*Memantine</p> <p>Nonpharmacologic therapies considered include psychosocial interventions, behavioral interventions, CBT, play therapy, mindfulness-based therapies, school interventions, cognitive training therapies, biofeedback or neurofeedback, parent behavior training, dietary supplements (eg, omega-3 fatty acids, vitamins, herbal supplements, probiotics), homeopathy, acupuncture, elimination diets, vision training, exercise, and chiropractic treatment.</p>                                                                                                                                                                                                                                                                                                                                                                                                                                                                                                                                                                                                                                                                                                                                                                                                                                                                                                                                                                                                                                                                                                                                                                                                                                                                                                                                                                                                                                                                                                                                                                                                   |                                                                |
| Comparators    | <p>KQ 3: follow-up visits in primary care with various methods and within times (monthly to annually) for repeat monitoring independent of treatment.</p> <p>KQ 1: confirmation of diagnosis by a specialist (gold standard), including psychologist or psychiatrist or other care provider using a well-validated and reliable process of confirming the diagnosis of ADHD according to the DSM 4 or DSM 5.</p> <p>KQ 2: specific treatments compared with other treatments as described above or to no treatment.</p> <p>KQ 3: follow-up compared with differing durations of follow-up or differing settings of follow-up.</p>                                                                                                                                                                                                                                                                                                                                                                                                                                                                                                                                                                                                                                                                                                                                                                                                                                                                                                                                                                                                                                                                                                                                                                                                                                                                                                                                                                                                                                                      | KQ 1: comparison with diagnosis with a nonvalidated instrument |
| Outcomes       | <p>KQ 1:</p> <p>Accuracy of diagnostic strategy, as measured by:</p> <ul style="list-style-type: none"> <li>Diagnostic concordance of primary care provider with specialist</li> <li>Interrater reliability</li> <li>Internal consistency</li> <li>Test-retest</li> <li>Sensitivity</li> <li>Specificity</li> <li>Positive predictive value</li> <li>Negative predictive value</li> <li>False-positives</li> <li>False-negatives</li> </ul> <p>Risk of missed condition that can appear as ADHD (ie, misdiagnosis)</p> <p>Labeling is any measure of stigma after diagnosis comparing those with and without ADHD.</p> <p>KQ 2:</p> <p>Intermediate outcomes:</p> <ul style="list-style-type: none"> <li>Changes on standardized symptom scores or progress toward patient-identified goals. Standardized symptom scores include narrow-band-focused instruments (Vanderbilt RSs, ADHD RS) and broad-band scales (CBCL and teacher report form; behavior assessment system for children; Conners' RSs, revised; Conners' 3 parent; Conners' 3 teacher)</li> <li>Acceptability of treatment</li> <li>Functional impairment (assessed using the CGI scale or the impairment RS)</li> </ul> <p>Final outcomes include the following:</p> <ul style="list-style-type: none"> <li>Academic performance <ul style="list-style-type: none"> <li>Academic performance RS</li> <li>Academic Competency Evaluation Scale</li> <li>(Actual) school grades</li> <li>Grade retention/not being promoted</li> <li>Vanderbilt teacher form academic performance subscale</li> <li>Standardized achievement tests (WIAT, WJ, WRAT)</li> </ul> </li> <li>Workforce participation</li> <li>Quality of peer relationships</li> <li>Divorce or relationship status</li> <li>Motor vehicle collisions or other accidents</li> <li>Motor vehicle violations</li> <li>Risk-taking behaviors</li> <li>Incarceration or other interactions with the legal system (juvenile detention, probation, court-mandated interventions, need for residential placement)</li> <li>Obesity</li> <li>Tobacco use</li> </ul> | —                                                              |

**TABLE 16** Continued

| PICOTS Element | Inclusion Criteria                                                                                                                                                                                                                                                                                                                                                                                                                                                                                                                                                                                                                                                                                                                                                                                                                                                                                                                                                                                                                                                                                                                                                                                                                                                                                                                                                                                                                                                                                                    | Exclusion Criteria |
|----------------|-----------------------------------------------------------------------------------------------------------------------------------------------------------------------------------------------------------------------------------------------------------------------------------------------------------------------------------------------------------------------------------------------------------------------------------------------------------------------------------------------------------------------------------------------------------------------------------------------------------------------------------------------------------------------------------------------------------------------------------------------------------------------------------------------------------------------------------------------------------------------------------------------------------------------------------------------------------------------------------------------------------------------------------------------------------------------------------------------------------------------------------------------------------------------------------------------------------------------------------------------------------------------------------------------------------------------------------------------------------------------------------------------------------------------------------------------------------------------------------------------------------------------|--------------------|
|                | <ul style="list-style-type: none"> <li>Substance abuse</li> <li>Mood disorders</li> <li>Depression or anxiety</li> <li>Self-injurious nonsuicidal behavior</li> <li>Suicide (attempted or completed)</li> <li>Suicidal ideation</li> <li>Mortality</li> <li>Adverse effects of treatment, including the following:                             <ul style="list-style-type: none"> <li>Changes in appetite</li> <li>Growth suppression</li> <li>Weight decrease</li> <li>Sleep disturbance</li> <li>Gastrointestinal symptoms</li> <li>Elevated blood pressure</li> <li>Increased heart rate</li> <li>Risk of sudden cardiac death</li> <li>Cardiac arrhythmias</li> <li>Conduction abnormalities</li> <li>Tics or other movement disorders</li> <li>Behavior changes</li> <li>Hallucination</li> <li>Aggression</li> <li>Suicide (attempted or completed)</li> <li>Suicidal ideation</li> <li>Overtreatment</li> <li>Diversion of pharmacotherapy</li> <li>Parental stress</li> <li>Personality change</li> <li>Time demands and/or opportunity cost</li> <li>Loss of spontaneity</li> <li>Chemical leukoderma</li> <li>Priapism</li> </ul> </li> <li>KQ 3:                             <ul style="list-style-type: none"> <li>Changes in treatment or dose</li> <li>Adverse effects of treatment as described under KQ 2</li> <li>Changes in intermediate outcomes (eg, standardized symptom scores, progress toward patient-identified goals, functional impairment) as described under KQ 2</li> </ul> </li> </ul> |                    |
| Timing         | <ul style="list-style-type: none"> <li>KQ 1:                             <ul style="list-style-type: none"> <li>For assessment of diagnostic accuracy: diagnostic follow-up must be within 4 mo of the initial evaluation and must be completed before treatment is initiated</li> <li>For labeling: any time after the ADHD diagnosis</li> </ul> </li> <li>KQs 2 and 3: any</li> </ul>                                                                                                                                                                                                                                                                                                                                                                                                                                                                                                                                                                                                                                                                                                                                                                                                                                                                                                                                                                                                                                                                                                                               | —                  |
| Settings       | <ul style="list-style-type: none"> <li>KQ 1: primary or specialty care settings</li> <li>KQs 2 and 3: any</li> </ul>                                                                                                                                                                                                                                                                                                                                                                                                                                                                                                                                                                                                                                                                                                                                                                                                                                                                                                                                                                                                                                                                                                                                                                                                                                                                                                                                                                                                  | None               |

TABLE 16 Continued

| PICOTS Element | Inclusion Criteria                                                                                                                                                                                                                                                                                                                                                                                                                                                                                                                                                                                                                                                                                                                                                                                                | Exclusion Criteria                                                                                                                                                                                                                                                                                                                                                                                                                                                                                                                                                                                                                                                                                                |
|----------------|-------------------------------------------------------------------------------------------------------------------------------------------------------------------------------------------------------------------------------------------------------------------------------------------------------------------------------------------------------------------------------------------------------------------------------------------------------------------------------------------------------------------------------------------------------------------------------------------------------------------------------------------------------------------------------------------------------------------------------------------------------------------------------------------------------------------|-------------------------------------------------------------------------------------------------------------------------------------------------------------------------------------------------------------------------------------------------------------------------------------------------------------------------------------------------------------------------------------------------------------------------------------------------------------------------------------------------------------------------------------------------------------------------------------------------------------------------------------------------------------------------------------------------------------------|
| Study design   | <p>Original data</p> <p>Randomized trials, prospective and retrospective observational studies with comparator; for diagnostic accuracy, cross-sectional studies are acceptable if they include patients with diagnostic uncertainty and direct comparison of diagnosis in primary care to diagnosis by a specialist</p> <p>RCTs with sample size:</p> <p>≥20 subjects for KQs 1 and 3</p> <p>≥50 subjects for KQ 2 (or 100 subjects for studies in which 2 or more pharmacologic treatments approved by the FDA for the treatment of ADHD are compared)</p> <p>Observational studies with sample size:</p> <p>≥20 subjects for KQs 1 and 3</p> <p>≥50 subjects for KQ 2 (or 100 subjects for studies in which 2 or more pharmacologic treatments approved by the FDA for the treatment of ADHD are compared)</p> | <p>Editorials, nonsystematic reviews, letters, case series, case reports, abstract only, pre-post studies</p> <p>Because studies with &lt;20 subjects are often pilot studies or studies of lower quality, we excluded them from our review. Given the large evidence base for comparative pharmacologic treatment studies in KQ 2, we increased this sample size limit to 50 subjects for KQ 2 and to 100 subjects for studies in which 2 or more pharmacologic treatments approved by the FDA for the treatment of ADHD were compared. These sample size limits were seen as representing population study sizes that would be needed to substantially impact the assessment of the existing evidence base.</p> |
| Publications   | <p>English-language publications only</p> <p>Published on or after January 1, 2009</p> <p>Relevant systematic reviews, meta-analyses, or methods articles (used for background only)<sup>c</sup></p>                                                                                                                                                                                                                                                                                                                                                                                                                                                                                                                                                                                                              | <p>Non-English language articles<sup>b</sup></p>                                                                                                                                                                                                                                                                                                                                                                                                                                                                                                                                                                                                                                                                  |

DSM, Diagnostic and Statistical Manual of Mental Disorders; KQ, key question; PICOTS, Populations, Interventions, Comparators, Outcomes, Timing, Settings; SNAP-IV, Swanson, Nolan and Pelham Revision IV; WIAT, Wechsler Individual Achievement Test; WJ, Woodcock-Johnson; WRAT, Wide Range Achievement Test. —, not applicable.

<sup>a</sup> Pharmacologic treatments listed are FDA-approved for an indication of ADHD, with the exception of those marked with an asterisk, which are available within the United States and are FDA-approved but not specifically approved for ADHD.

<sup>b</sup> Non-English language articles were excluded due to the following: (1) the high volume of literature available in English language publications, (2) the focus of our review on applicability to populations in the United States, and (3) the scope of our KQs.

<sup>c</sup> Systematic reviews and meta-analyses were excluded from direct abstraction; those representing key sources were hand-searched as potential sources of additional citations to consider in the review.

SUPPLEMENTAL TABLE 17 Definition of Quality Assessment Ratings

| Rating                   | Definition                                                                                                                                                                                                                                                                                                                                                                                                                             |
|--------------------------|----------------------------------------------------------------------------------------------------------------------------------------------------------------------------------------------------------------------------------------------------------------------------------------------------------------------------------------------------------------------------------------------------------------------------------------|
| Good (low risk of bias)  | These studies had the least bias, and the results were considered valid. These studies adhered to the commonly held concepts of high quality, including the following: a clear description of the population, setting, approaches, and comparison groups; appropriate measurement of outcomes; appropriate statistical and analytical methods and reporting; no reporting errors; a low dropout rate; and clear reporting of dropouts. |
| Fair                     | These studies were susceptible to some bias but not enough to invalidate the results. They did not meet all the criteria required for a rating of good quality because they had some deficiencies, but no flaw was likely to cause major bias. The study may have been missing information, making it difficult to assess limitations and potential problems.                                                                          |
| Poor (high risk of bias) | These studies had significant flaws that might have invalidated the results. They had serious errors in design, analysis, or reporting; large amounts of missing information; or discrepancies in reporting.                                                                                                                                                                                                                           |

**SUPPLEMENTAL TABLE 18** Changes in Standardized Scores on Neurofeedback Interventions for ADHD

| Study (Companion); <i>N</i> ; Quality <sup>a</sup> ; Design; Age Category                                                                                                                                               | Intervention                                     | Comparison                | Follow-up Times | Findings—Intervention                                                                                                                                                                                                   | Findings—Comparison                                                                                                                                                                                                   | Between Group <i>P</i>                         |
|-------------------------------------------------------------------------------------------------------------------------------------------------------------------------------------------------------------------------|--------------------------------------------------|---------------------------|-----------------|-------------------------------------------------------------------------------------------------------------------------------------------------------------------------------------------------------------------------|-----------------------------------------------------------------------------------------------------------------------------------------------------------------------------------------------------------------------|------------------------------------------------|
| Nonpharmacologic versus nonpharmacologic<br>Gevensleben et al <sup>64</sup><br>Neurofeedback training<br>(Gevensleben et al <sup>65</sup> ; Wangler et al <sup>75</sup> )<br>102<br>Good<br>RCT<br>Children aged 7–17 y | Neurofeedback                                    | Attention skills training | 2 mo            | German ADHD RS<br><br>Mean within group change = -0.39 (SD = 0.37)                                                                                                                                                      | German ADHD RS<br><br>Mean within group change = -0.1 (SD = 0.44)                                                                                                                                                     | <i>P</i> < .005                                |
| Moreno-García et al <sup>65</sup><br>57<br>Fair<br>RCT<br>Children aged 7–17 y                                                                                                                                          | Neurofeedback                                    | Behavioral treatment      | NR              | IVA/CPT: full-scale attention<br><br>Mean = 2.1 (SD = 16.88)                                                                                                                                                            | IVA/CPT: full-scale attention<br><br>Mean = 3.88 (SD = 16.24)                                                                                                                                                         | <i>P</i> = .013                                |
| Steiner et al <sup>69</sup><br>(Steiner et al <sup>68</sup> )<br>104<br>Good<br>RCT<br>Children aged 7–17 y                                                                                                             | Neurofeedback                                    | Cognitive training        | 5 mo            | Conners 3: parent inattention<br><br>Within-group effect size = -0.8                                                                                                                                                    | Conners 3: parent inattention<br><br>Within-group effect size = -0.46                                                                                                                                                 | <i>P</i> < .05                                 |
| Nonpharmacologic versus pharmacologic<br>Duric et al <sup>25</sup> (Duric et al <sup>26</sup> )<br>91<br>Poor<br>RCT<br>Children aged 7–17 y                                                                            | MPH (dose not reported)<br>MPH and neurofeedback | Neurofeedback             | 10 wk           | Conners 3: parent executive functioning<br>Within-group effect size = -0.49<br>Conners 3: parent global index<br>Within-group effect size = -0.37<br>Conners 3: teacher inattention<br>Within-group effect size = -0.25 | Conners 3: parent executive functioning<br>Within-group effect size -0.12<br>Conners 3: parent global index<br>Within-group effect size = -0.09<br>Conners 3: teacher inattention<br>Within-group effect size = -0.24 | NS<br><br><i>P</i> < .05<br><br><i>P</i> < .05 |
| Nonpharmacologic versus placebo, usual care, or waitlist                                                                                                                                                                | MPH (dose not reported)<br>MPH and neurofeedback | Neurofeedback             | 10 wk           | Neurofeedback: total Barkley RS for parents<br><br>Mean within-group change = 10.7; 95% CI = 7.6 to 13.8                                                                                                                | MPH and neurofeedback: total Barkley RS for parents<br><br>Mean w/in group change = 8.6; 95% CI = 5.0 to 12.2<br><br>MPH: total Barkley RS for parents<br>Mean within group change = 7.9; 95% CI = 4.5 to 11.4        | <i>P</i> = .31                                 |



TABLE 18 Continued

| Study (Companion); N Quality <sup>a</sup> ; Design; Age Category | Intervention                          | Comparison                       | Follow-up Times | Findings—Intervention                                                                                                                                                                                                                                                                                                                                                                                                                                                                                                                      | Findings—Comparison                                                                                                                                                                                                                                                                                                                                                                                                                                                                                                                          | Between Group P                        |
|------------------------------------------------------------------|---------------------------------------|----------------------------------|-----------------|--------------------------------------------------------------------------------------------------------------------------------------------------------------------------------------------------------------------------------------------------------------------------------------------------------------------------------------------------------------------------------------------------------------------------------------------------------------------------------------------------------------------------------------------|----------------------------------------------------------------------------------------------------------------------------------------------------------------------------------------------------------------------------------------------------------------------------------------------------------------------------------------------------------------------------------------------------------------------------------------------------------------------------------------------------------------------------------------------|----------------------------------------|
| Bink et al <sup>19</sup><br>90<br>Good<br>RCT                    | Neurofeedback plus treatment as usual | Treatment as usual               | Baseline        | ADHD RS: inattention<br>Mean = 4.4 (SD = 2.49)<br>ADHD RS: hyperactivity and/or inattention<br>Mean = 3.44 (SD = 2.12)<br>Youth self-report total score<br>Mean = 48.5 (SD = 22.01)<br>CBCL total score<br>Mean = 60.81 (SD = 28.57)<br>ADHD RS: inattention<br>Mean = 2.84 (SD = 2.59)<br>ADHD RS: hyperactivity and/or inattention<br>Mean = 2.36 (SD = 2.16)<br>Youth self-report total score<br>Mean = 40.43 (SD = 18.24)<br>CBCL total score<br>Mean = 53.35 (SD = 27.55)<br>IVA/CPT: full-scale attention<br>Mean = 2.1 (SD = 16.88) | ADHD RS: inattention<br>Mean = 5.27 (SD = 2.16)<br>ADHD RS: hyperactivity and/or inattention<br>Mean = 3.27 (SD = 2.01)<br>Youth self-report total score<br>Mean = 52.58 (SD = 18.89)<br>CBCL total score<br>Mean = 63.77 (SD = 27)<br>ADHD RS: inattention<br>Mean = 3.62 (SD = 2.45)<br>ADHD RS: hyperactivity and/or inattention<br>Mean = 2.38 (SD = 2.14)<br>Youth self-report total score<br>Mean = 46.12 (SD = 20.17)<br>CBCL total score<br>Mean = 52.81 (SD = 30.28)<br>IVA/CPT: full-scale attention<br>Mean = -28.57 (SD = 11.67) | NS                                     |
| Moreno-García et al <sup>65</sup><br>57<br>Fair<br>RCT           | Neurofeedback                         | Standard pharmacologic treatment | NR              |                                                                                                                                                                                                                                                                                                                                                                                                                                                                                                                                            |                                                                                                                                                                                                                                                                                                                                                                                                                                                                                                                                              | P = .002                               |
| Children aged 7–17 y                                             |                                       |                                  |                 |                                                                                                                                                                                                                                                                                                                                                                                                                                                                                                                                            |                                                                                                                                                                                                                                                                                                                                                                                                                                                                                                                                              |                                        |
| Steiner et al <sup>69</sup><br>104<br>Good<br>RCT                | Neurofeedback                         | Waitlist control                 | 5 mo            | Conners 3: parent inattention<br>Within-group effect size = -0.8<br>Conners 3: parent executive functioning<br>Within-group effect size = -0.49<br>Conners 3: parent global index<br>Within-group effect size = -0.37<br>Conners 3: teacher inattention<br>Within-group effect size = -0.25                                                                                                                                                                                                                                                | Conners 3: parent inattention<br>Within-group effect size = -0.15<br>Conners 3: parent executive functioning<br>Within-group effect size = -0.09<br>Conners 3: parent global index<br>Within-group effect size = -0.05<br>Conners 3: teacher inattention<br>Within-group effect size = 0                                                                                                                                                                                                                                                     | P < .001<br>P < .001<br>P < .001<br>NS |
| Children aged 7–17 y                                             |                                       |                                  |                 |                                                                                                                                                                                                                                                                                                                                                                                                                                                                                                                                            |                                                                                                                                                                                                                                                                                                                                                                                                                                                                                                                                              |                                        |

CI, confidence interval; MPH, methylphenidate; NR, not recorded; NS, not significant.

<sup>a</sup> See "Quality and Applicability Assessment of Individual Studies" for definitions of quality assessment ratings.

**SUPPLEMENTAL TABLE 19** Findings on Neurofeedback Interventions for ADHD

| Study (Companion); <i>M</i> : Quality <sup>a</sup> ; Design; Age Category                                                                                                                | Intervention           | Comparison                | Follow-up Times | Findings—Intervention                                                                                                                                                                                                                                                                                                                       | Findings—Comparison                                                                                                                                                                                                                                                                                                                        | Between Group <i>P</i> |
|------------------------------------------------------------------------------------------------------------------------------------------------------------------------------------------|------------------------|---------------------------|-----------------|---------------------------------------------------------------------------------------------------------------------------------------------------------------------------------------------------------------------------------------------------------------------------------------------------------------------------------------------|--------------------------------------------------------------------------------------------------------------------------------------------------------------------------------------------------------------------------------------------------------------------------------------------------------------------------------------------|------------------------|
| Nonpharmacologic versus nonpharmacologic Acceptability of treatment Gevensleben et al <sup>54</sup> (Gevensleben et al <sup>55</sup> Wangler et al <sup>75</sup> )<br>102<br>Good<br>RCT | Neurofeedback training | Attention skills training | 2 mo            | Effectiveness of treatment<br><br>Mean = 3.19 (SD = 0.82)<br><br>Parent rated motivation of their children to participate in treatment<br><br>Mean = 0.64 (SD = 0.77)                                                                                                                                                                       | Effectiveness of treatment<br><br>Mean = 3.13 (SD = 0.90)<br><br>Parent rated motivation of their children to participate in treatment<br><br>Mean = 0.56 (SD = 1.13)                                                                                                                                                                      | <i>P</i> = .77         |
| Children aged 7–17 y                                                                                                                                                                     |                        |                           |                 |                                                                                                                                                                                                                                                                                                                                             |                                                                                                                                                                                                                                                                                                                                            |                        |
| Behavior changes Geladé et al <sup>53</sup>                                                                                                                                              | Neurofeedback training | Physical activity         | 12 wk           | SWAN: inattention (parent)<br><br>Mean = -0.52 (95% CI: -0.53 to -0.10)<br>SWAN: hyperactivity and/or impulsiveness (parent)<br>Mean = -0.29 (95% CI: -0.50 to -0.07)<br>SWAN: inattention (teacher)<br>Mean = -0.10 (95% CI: -0.31 to -0.11)<br>SWAN: hyperactivity and/or impulsiveness (teacher)<br>Mean = -0.03 (95% CI: -0.28 to 0.23) | SWAN: inattention (parent)<br><br>Mean = -0.17 (95% CI: -0.37 to 0.02)<br>SWAN: hyperactivity and/or impulsiveness (parent)<br>Mean = -0.21 (95% CI: -0.41 to -0.01)<br>SWAN: inattention (teacher)<br>Mean = -0.05 (95% CI: -0.23 to -0.12)<br>SWAN: hyperactivity and/or impulsiveness (teacher)<br>Mean = -0.02 (95% CI: -0.18 to 0.13) | NS                     |
| 103<br>Good<br>RCT                                                                                                                                                                       |                        |                           |                 |                                                                                                                                                                                                                                                                                                                                             |                                                                                                                                                                                                                                                                                                                                            | NS                     |
| Children aged 7–17 y                                                                                                                                                                     |                        |                           |                 |                                                                                                                                                                                                                                                                                                                                             |                                                                                                                                                                                                                                                                                                                                            | NS                     |
| Sleep disturbance Geladé et al <sup>53</sup>                                                                                                                                             | Neurofeedback training | Physical activity         | 12 wk           | SDSC<br><br>Mean = -2.16 (95% CI: -4.82 to 0.51)                                                                                                                                                                                                                                                                                            | SDSC<br><br>Mean = -1.03 (95% CI: -2.86 to 0.80)                                                                                                                                                                                                                                                                                           | NS                     |
| 103<br>Good<br>RCT                                                                                                                                                                       |                        |                           |                 |                                                                                                                                                                                                                                                                                                                                             |                                                                                                                                                                                                                                                                                                                                            | NS                     |
| Children aged 7–17 y                                                                                                                                                                     |                        |                           |                 |                                                                                                                                                                                                                                                                                                                                             |                                                                                                                                                                                                                                                                                                                                            |                        |
| Nonpharmacologic versus pharmacologic Sleep disturbance Geladé et al <sup>53</sup>                                                                                                       | Neurofeedback training | MPH                       | 12 wk           | SDSC<br><br>Mean = -2.16 (95% CI: -4.82 to 0.51)                                                                                                                                                                                                                                                                                            | SDSC<br><br>Mean = -0.54 (95% CI: -2.90 to 1.81)                                                                                                                                                                                                                                                                                           | <i>P</i> = .06         |
| 112<br>Good<br>RCT                                                                                                                                                                       |                        |                           |                 |                                                                                                                                                                                                                                                                                                                                             |                                                                                                                                                                                                                                                                                                                                            |                        |
| Children aged 7–17 y                                                                                                                                                                     |                        |                           |                 |                                                                                                                                                                                                                                                                                                                                             |                                                                                                                                                                                                                                                                                                                                            |                        |
| Behavior changes Geladé et al <sup>53</sup>                                                                                                                                              | Neurofeedback training | MPH                       | 12 wk           | SWAN: inattention (parent)<br><br>Mean = -0.52 (95% CI: -0.53 to -0.10)                                                                                                                                                                                                                                                                     | SWAN: inattention (parent)<br><br>Mean = -0.78 (95% CI: -1.03 to -0.53)                                                                                                                                                                                                                                                                    | <i>P</i> < .001        |
| 112                                                                                                                                                                                      |                        |                           |                 |                                                                                                                                                                                                                                                                                                                                             |                                                                                                                                                                                                                                                                                                                                            |                        |

TABLE 19 Continued

| Study (Companion); <i>N</i> ; Quality <sup>a</sup> ; Design; Intervention | Comparison | Follow-up Times | Findings—Intervention                                                                      | Findings—Comparison                                                                         | Between Group <i>P</i> |
|---------------------------------------------------------------------------|------------|-----------------|--------------------------------------------------------------------------------------------|---------------------------------------------------------------------------------------------|------------------------|
| Age Category                                                              |            |                 |                                                                                            |                                                                                             |                        |
| Good                                                                      |            |                 | SWAN: hyperactivity and/or impulsiveness (parent)<br>Mean = -0.29 (95% CI: -0.50 to -0.07) | SWAN: hyperactivity and/or impulsiveness (parent)<br>Mean = -0.52 (95% CI: -0.74 to -0.30)  | <i>P</i> < .001        |
| RCT                                                                       |            |                 | SWAN: inattention (teacher)<br>Mean = -0.10 (95% CI: -0.31 to -0.11)                       | SWAN: inattention (teacher)<br>Mean = -0.95 (95% CI: -1.23 to -0.68)                        | <i>P</i> < .001        |
| Children aged 7–17 y                                                      |            |                 | SWAN: hyperactivity and/or impulsiveness (teacher)<br>Mean = -0.03 (95% CI: -0.28 to 0.23) | SWAN: hyperactivity and/or impulsiveness (teacher)<br>Mean = -0.70 (95% CI: -1.05 to -0.34) | <i>P</i> = .001        |
| Nonpharmacologic versus placebo, usual care, or waitlist (NA)             |            |                 |                                                                                            |                                                                                             |                        |

CI, confidence interval; MPH, methylphenidate; NA, not available; NS, not significant; SDSC, Sleep Disturbance Scale for Children; SWAN, Strengths and Weaknesses of ADHD Symptoms and Normal Behavior Rating Scale.

<sup>a</sup> See Supplemental Table 17 for the definition of quality assessment ratings.

**SUPPLEMENTAL TABLE 20** Changes in Standardized Scores on Cognitive Training Interventions for ADHD

| Study (Companion); <i>M</i> ; Quality <sup>a</sup> ; Design; Age Category | Intervention                                                                | Comparison                                                                                  | Follow-up Times | Findings—Intervention                                                                                                                                                                                                                                               | Findings—Comparison                                                                                                                                                                                                                                                                                    | Between Group <i>P</i>                                                                                                                                                     |
|---------------------------------------------------------------------------|-----------------------------------------------------------------------------|---------------------------------------------------------------------------------------------|-----------------|---------------------------------------------------------------------------------------------------------------------------------------------------------------------------------------------------------------------------------------------------------------------|--------------------------------------------------------------------------------------------------------------------------------------------------------------------------------------------------------------------------------------------------------------------------------------------------------|----------------------------------------------------------------------------------------------------------------------------------------------------------------------------|
| <b>Nonpharmacologic versus nonpharmacologic</b>                           |                                                                             |                                                                                             |                 |                                                                                                                                                                                                                                                                     |                                                                                                                                                                                                                                                                                                        |                                                                                                                                                                            |
| Chacko et al <sup>25</sup>                                                | Cogmed working memory training with difficulty titrated to a user's ability | Cogmed working memory training with difficulty not titrated to a user's ability             | 3 wk post       | Parent disruptive behavior disorder RS: inattention symptoms<br>Parent disruptive behavior disorder RS: hyperactive symptoms<br>Teacher disruptive behavior disorder RS: inattention symptoms<br>Teacher disruptive behavior disorder RS: hyperactive               | Parent disruptive behavior disorder RS: inattention symptoms<br>Parent disruptive behavior disorder RS: hyperactive symptoms<br>Teacher disruptive behavior disorder RS: inattention symptoms<br>Teacher disruptive behavior disorder RS: hyperactive                                                  | Effect = 1.98 (SE = 1.17) <i>P</i> = .2<br>Effect = 1.88 (SE = 1.15) <i>P</i> = .2<br>Effect = 1.84 (SE = 1.49) <i>P</i> = .22<br>Effect = 1.94 (SE = 1.54) <i>P</i> = .21 |
| RCT<br>Children aged 7–17 y                                               |                                                                             |                                                                                             |                 |                                                                                                                                                                                                                                                                     |                                                                                                                                                                                                                                                                                                        |                                                                                                                                                                            |
| Dovis et al <sup>24</sup>                                                 | Braingame Brian (computerized, home-based executive functioning training)   | Braingame Brian in training mode and the working memory task in placebo mode                | 3 mo            | Parent DBDRS: inattention<br>Mean = 12.9 (SD = 4.1)<br>Parent DBDRS: hyperactivity and/or impulsivity<br>Mean = 12.6 (SD = 6.4)<br>Teacher DBDRS: inattention<br>Mean = 12.2 (SD = 5.8)<br>Teacher DBDRS: hyperactivity and/or impulsivity<br>Mean = 9.3 (SD = 4.9) | Parent DBDRS: inattention<br>Mean = 14.6 (SD = 5.3)<br>Parent DBDRS: hyperactivity and/or impulsivity<br>Mean = 13 (SD = 5.1)<br>Teacher DBDRS: inattention<br>Mean = 13.3 (SD = 6.6)<br>Teacher DBDRS: hyperactivity and/or impulsivity<br>Mean = 11.5 (SD = 7)                                       | NS<br>NS<br>NS<br>NS                                                                                                                                                       |
| Good<br>RCT<br>Children aged 7–17 y                                       |                                                                             | All tasks in training mode (overall easier)                                                 |                 |                                                                                                                                                                                                                                                                     |                                                                                                                                                                                                                                                                                                        | NS                                                                                                                                                                         |
| <b>van Dongen-Boomsma et al<sup>2</sup></b>                               |                                                                             |                                                                                             |                 |                                                                                                                                                                                                                                                                     |                                                                                                                                                                                                                                                                                                        |                                                                                                                                                                            |
| 51<br>Good<br>RCT<br>Children of all ages ≤17 y                           | Cogmed training program                                                     | Cogmed training program without adjustment for patient skill level (control group)          | 5 wk            | ADHD RS: total investigator score<br><br>Mean = 32.4 (SE = 5.7)<br>ADHD RS: teacher<br>Mean = 27.5 (SE = 10.1)                                                                                                                                                      | Parent DBDRS: inattention<br>Mean = 14.1 (SD = 4.7)<br>Parent DBDRS: hyperactivity and/or impulsivity<br>Mean = 12.5 (SD = 5.7)<br>Teacher DBDRS: inattention<br>Mean = 11.3 (SD = 5.1)<br>Teacher DBDRS: hyperactivity and/or impulsivity<br>Mean = 6 (SD = 9.1)<br>ADHD RS: total investigator score | NS<br>NS<br>NS<br>NS<br>NS                                                                                                                                                 |
| <b>Van der Donk et al<sup>71</sup></b>                                    |                                                                             |                                                                                             |                 |                                                                                                                                                                                                                                                                     |                                                                                                                                                                                                                                                                                                        |                                                                                                                                                                            |
| 105<br>Fair<br>RCT<br>Children aged 7–17 y                                | Cogmed working memory training                                              | Paying attention in class (experimental, combined working memory and compensatory training) | 6 wk            | CBCL: attention problems scale                                                                                                                                                                                                                                      | CBCL: attention problems scale                                                                                                                                                                                                                                                                         | NR                                                                                                                                                                         |
| <b>Nonpharmacologic versus pharmacologic (NA)</b>                         |                                                                             |                                                                                             |                 |                                                                                                                                                                                                                                                                     |                                                                                                                                                                                                                                                                                                        |                                                                                                                                                                            |
|                                                                           |                                                                             |                                                                                             | 6 mo            | CBCL: externalizing problems scale                                                                                                                                                                                                                                  | CBCL: externalizing problems scale                                                                                                                                                                                                                                                                     | NR                                                                                                                                                                         |

TABLE 20 Continued

| Study (Companion); <i>N</i> ; Quality <sup>a</sup> ; Design; Age Category | Intervention                               | Comparison       | Follow-up Times     | Findings—Intervention                                                                                                                                                                                                                                                                                                                                                                                                                                                                                                                                                                                                                                                                                                                                                                 | Findings—Comparison                                                                                                                                                                                                                                                                                                                                                                                                                                                                                                                                                                                                                                                                                                                                                                 | Between Group <i>P</i>                                                                                                                       |
|---------------------------------------------------------------------------|--------------------------------------------|------------------|---------------------|---------------------------------------------------------------------------------------------------------------------------------------------------------------------------------------------------------------------------------------------------------------------------------------------------------------------------------------------------------------------------------------------------------------------------------------------------------------------------------------------------------------------------------------------------------------------------------------------------------------------------------------------------------------------------------------------------------------------------------------------------------------------------------------|-------------------------------------------------------------------------------------------------------------------------------------------------------------------------------------------------------------------------------------------------------------------------------------------------------------------------------------------------------------------------------------------------------------------------------------------------------------------------------------------------------------------------------------------------------------------------------------------------------------------------------------------------------------------------------------------------------------------------------------------------------------------------------------|----------------------------------------------------------------------------------------------------------------------------------------------|
| Nonpharmacologic versus placebo, usual care, or waitlist                  |                                            |                  |                     |                                                                                                                                                                                                                                                                                                                                                                                                                                                                                                                                                                                                                                                                                                                                                                                       |                                                                                                                                                                                                                                                                                                                                                                                                                                                                                                                                                                                                                                                                                                                                                                                     |                                                                                                                                              |
| Egeland et al <sup>28</sup>                                               | Cogmed                                     | Waitlist control | 8 mo                | ADHD RS: total score teacher Mean = 20.1 (SD = 9.8)<br>ADHD RS: parent Mean = 27 (SD = 11.5)                                                                                                                                                                                                                                                                                                                                                                                                                                                                                                                                                                                                                                                                                          | ADHD RS: total score teacher Mean = 22.6 (SD = 12.3)<br>ADHD RS: parent Mean = 28.1 (SD = 11)                                                                                                                                                                                                                                                                                                                                                                                                                                                                                                                                                                                                                                                                                       | NS                                                                                                                                           |
| Hovik et al <sup>41</sup>                                                 | RoboMemo program                           |                  |                     |                                                                                                                                                                                                                                                                                                                                                                                                                                                                                                                                                                                                                                                                                                                                                                                       |                                                                                                                                                                                                                                                                                                                                                                                                                                                                                                                                                                                                                                                                                                                                                                                     | NS                                                                                                                                           |
| Good RCT                                                                  |                                            |                  |                     |                                                                                                                                                                                                                                                                                                                                                                                                                                                                                                                                                                                                                                                                                                                                                                                       |                                                                                                                                                                                                                                                                                                                                                                                                                                                                                                                                                                                                                                                                                                                                                                                     |                                                                                                                                              |
| Children aged 7–17 y                                                      |                                            |                  |                     |                                                                                                                                                                                                                                                                                                                                                                                                                                                                                                                                                                                                                                                                                                                                                                                       |                                                                                                                                                                                                                                                                                                                                                                                                                                                                                                                                                                                                                                                                                                                                                                                     |                                                                                                                                              |
| Beck et al <sup>18</sup>                                                  | Computer-based working memory intervention | Waitlist control | Baseline, follow-up | ADHD index parent mean = 71.7 (SD = 8.82); mean = 62.78 (SD = 9.55)<br>Conners cognitive problems and/or inattention Parent mean = 67.96 (SD = 9.55)<br>Mean = 59.89 (SD = 9.15)                                                                                                                                                                                                                                                                                                                                                                                                                                                                                                                                                                                                      | ADHD index parent mean = 69.92 (SD = 7.86); mean = 67.33 (SD = 7.33)<br>Conners cognitive problems and/or inattention Parent mean = 65.38 (SD = 9.22)<br>Mean = 64.75 (SD = 10.22)                                                                                                                                                                                                                                                                                                                                                                                                                                                                                                                                                                                                  | <i>P</i> = .01<br><i>P</i> < .01                                                                                                             |
| Fair Observational                                                        |                                            |                  |                     |                                                                                                                                                                                                                                                                                                                                                                                                                                                                                                                                                                                                                                                                                                                                                                                       |                                                                                                                                                                                                                                                                                                                                                                                                                                                                                                                                                                                                                                                                                                                                                                                     |                                                                                                                                              |
| Children aged 7–17 y                                                      |                                            |                  |                     |                                                                                                                                                                                                                                                                                                                                                                                                                                                                                                                                                                                                                                                                                                                                                                                       |                                                                                                                                                                                                                                                                                                                                                                                                                                                                                                                                                                                                                                                                                                                                                                                     |                                                                                                                                              |
|                                                                           |                                            |                  |                     | Conners hyperactivity parent Mean = 68.37 (SD = 15.98)<br>Mean = 59.59 (SD = 14.89)<br>Conners oppositional parent Mean = 60 (SD = 13.34)<br>Mean = 53.96 (SD = 9.67)<br>Conners ADHD index teacher No. patients with outcome = 60.78 (SD = 14.96); No. patients with outcome = 56.38 (SD = 13.28)<br>Conners cognitive problems and/or inattention teacher mean = 60.89 (SD = 10.58)<br>Mean = 57.5 (SD = 7.91)<br>Conners hyperactivity teacher Mean = 59.59 (SD = 15.17)<br>Mean = 56.31 (SD = 13.47)<br>Conners oppositional teacher Mean = 56.52 (SD = 8.93)<br>Mean = 52.35 (SD = 10.12)<br>BRIEF metacognition index: parent Mean = 72.96 (SD = 8.06)<br>Mean = 64.19 (SD = 9.24)<br>BRIEF metacognition index: teacher Mean = 67.96 (SD = 18.67)<br>Mean = 64.85 (SD = 16.35) | Conners hyperactivity parent Mean = 65.7 (SD = 16.5)<br>Mean = 62.75 (SD = 13.73)<br>Conners oppositional parent Mean = 59.79 (SD = 12.17)<br>Mean = 57.5 (SD = 10.59)<br>Conners ADHD index teacher No. patients with outcome = 58.4 (SD = 11.4); No. patients with outcome = 56.52 (SD = 10.25)<br>Conners cognitive problems and/or inattention teacher mean = 56.24 (SD = 11.05)<br>Mean = 55.56 (SD = 10.26)<br>Conners hyperactivity teacher Mean = 55.36 (SD = 13.2)<br>Mean = 55.64 (SD = 11.14)<br>Conners oppositional teacher Mean = 52.92 (SD = 8.93)<br>Mean = 50.58 (SD = 8.71)<br>BRIEF metacognition index: parent Mean = 71.38 (SD = 7.73)<br>Mean = 69.61 (SD = 7.19)<br>BRIEF metacognition index: teacher Mean = 60.2 (SD = 13.04)<br>Mean = 60.79 (SD = 12.76) | <i>P</i> = .04<br><i>P</i> = .10<br><i>P</i> = .43<br><i>P</i> = .23<br><i>P</i> = .25<br><i>P</i> = .59<br><i>P</i> = .01<br><i>P</i> = .22 |

DBDRS, Disruptive Behavior Disorder Rating Scale; NA, not applicable; NR, not recorded; NS, not significant.  
<sup>a</sup> See “Quality Assessment and Applicability of Individual Studies” for definitions of quality assessment ratings.

| Study (Companion);<br>N; Quality <sup>a</sup> ; Design;<br>Age Category | Intervention                                                                | Comparison                                                                                  | Follow-up Times | Findings—Intervention                                                                                                                                                                                                                                               | Findings—Comparison                                                                                                                                                                                                                                              | Between Group P                             |
|-------------------------------------------------------------------------|-----------------------------------------------------------------------------|---------------------------------------------------------------------------------------------|-----------------|---------------------------------------------------------------------------------------------------------------------------------------------------------------------------------------------------------------------------------------------------------------------|------------------------------------------------------------------------------------------------------------------------------------------------------------------------------------------------------------------------------------------------------------------|---------------------------------------------|
| Nonpharmacologic versus nonpharmacologic                                |                                                                             |                                                                                             |                 |                                                                                                                                                                                                                                                                     |                                                                                                                                                                                                                                                                  |                                             |
| Academic performance                                                    |                                                                             |                                                                                             |                 |                                                                                                                                                                                                                                                                     |                                                                                                                                                                                                                                                                  |                                             |
| Chacko et al <sup>23</sup>                                              | Cogmed working memory training with difficulty titrated to a user's ability | "Placebo" Cogmed working memory training with difficulty not titrated to a user's ability   | 3 wk post       | WRAT-4 word reading                                                                                                                                                                                                                                                 | —                                                                                                                                                                                                                                                                | Treatment effect = -2.72 (SE = 5.5) P = .5  |
| 85                                                                      |                                                                             |                                                                                             |                 | WRAT-4 sentence completion                                                                                                                                                                                                                                          |                                                                                                                                                                                                                                                                  | Treatment effect = 5.6 (SE = 4.7) P = .23   |
| Good                                                                    |                                                                             |                                                                                             |                 | WRAT-4 math computation                                                                                                                                                                                                                                             |                                                                                                                                                                                                                                                                  | Treatment effect = 5.22 (SE = 5.21) P = .31 |
| RCT                                                                     |                                                                             |                                                                                             |                 | WRAT-4 spelling                                                                                                                                                                                                                                                     |                                                                                                                                                                                                                                                                  | Treatment effect = 1.28 (SE = 6.17) P = .83 |
| Children aged 7–17 y                                                    |                                                                             |                                                                                             |                 |                                                                                                                                                                                                                                                                     |                                                                                                                                                                                                                                                                  |                                             |
| Behavior changes                                                        |                                                                             |                                                                                             |                 |                                                                                                                                                                                                                                                                     |                                                                                                                                                                                                                                                                  |                                             |
| Dovis et al <sup>24</sup>                                               | Braingame Brian (computerized home-based executive functioning training)    | Braingame Brian in training mode and the working memory task in placebo mode                | 3 mo            | Parent DBDRS: inattention<br>Mean = 12.9 (SD = 4.1)<br>Parent DBDRS: hyperactivity and/or impulsivity<br>Mean = 12.6 (SD = 6.4)<br>Teacher DBDRS: inattention<br>Mean = 12.2 (SD = 5.8)<br>Teacher DBDRS: hyperactivity and/or impulsivity<br>Mean = 9.3 (SD = 4.9) | Parent DBDRS: inattention<br>Mean = 14.6 (SD = 5.3)<br>Parent DBDRS: hyperactivity and/or impulsivity<br>Mean = 13 (SD = 5.1)<br>Teacher DBDRS: inattention<br>Mean = 13.3 (SD = 6.6)<br>Teacher DBDRS: hyperactivity and/or impulsivity<br>Mean = 11.5 (SD = 7) | NS<br>NS<br>NS<br>NS<br>NS                  |
| 89                                                                      |                                                                             |                                                                                             |                 |                                                                                                                                                                                                                                                                     |                                                                                                                                                                                                                                                                  |                                             |
| Good                                                                    |                                                                             |                                                                                             |                 |                                                                                                                                                                                                                                                                     |                                                                                                                                                                                                                                                                  |                                             |
| RCT                                                                     |                                                                             |                                                                                             |                 |                                                                                                                                                                                                                                                                     |                                                                                                                                                                                                                                                                  |                                             |
| Children aged 7–17 y                                                    |                                                                             | All tasks in training mode (overall easier)                                                 |                 |                                                                                                                                                                                                                                                                     |                                                                                                                                                                                                                                                                  |                                             |
| Van der Donk et al <sup>71</sup>                                        |                                                                             |                                                                                             |                 |                                                                                                                                                                                                                                                                     |                                                                                                                                                                                                                                                                  |                                             |
| 105                                                                     | Cogmed working memory training                                              | Paying attention in class (experimental, combined working memory and compensatory training) | 6 wk            | CBCL: externalizing problems scale                                                                                                                                                                                                                                  | CBCL: attention problems scale                                                                                                                                                                                                                                   | NR                                          |
| Fair                                                                    |                                                                             |                                                                                             |                 |                                                                                                                                                                                                                                                                     |                                                                                                                                                                                                                                                                  |                                             |
| RCT                                                                     |                                                                             |                                                                                             |                 |                                                                                                                                                                                                                                                                     |                                                                                                                                                                                                                                                                  |                                             |
| Children aged 7–17 y                                                    |                                                                             |                                                                                             |                 |                                                                                                                                                                                                                                                                     |                                                                                                                                                                                                                                                                  |                                             |
| Functional impairment                                                   |                                                                             |                                                                                             |                 |                                                                                                                                                                                                                                                                     |                                                                                                                                                                                                                                                                  |                                             |

TABLE 21 Continued

| Study (Companion);<br>N; Quality <sup>a</sup> ; Design;<br>Age Category                                 | Intervention               | Comparison                                                                                     | Follow-up Times | Findings—Intervention                   | Findings—Comparison                   | Between Group <i>P</i> |
|---------------------------------------------------------------------------------------------------------|----------------------------|------------------------------------------------------------------------------------------------|-----------------|-----------------------------------------|---------------------------------------|------------------------|
| van Dongen-<br>Boomsma<br>et al <sup>22</sup><br>51<br>Good<br>RCT<br>Children<br>of all ages<br>≤ 17 y | Cogmed training<br>program | Cogmed training<br>program without<br>adjustment for<br>patient skill level<br>(control group) | 5 wk            | CGI-I<br>No. patients with outcome = 25 | CGH<br>No. patients with outcome = 21 | <i>P</i> = .514        |
| Nonpharmacologic versus pharmacologic (NA)                                                              |                            |                                                                                                |                 |                                         |                                       |                        |
| Nonpharmacologic versus placebo, usual care, or waitlist (NA)                                           |                            |                                                                                                |                 |                                         |                                       |                        |

CGI-I, Clinical Global Impression-Improvement; DBDRS, Disruptive Behavior Disorder Rating Scale; NA, not applicable; NR, not recorded; NS, not significant; —, not applicable.

<sup>a</sup> See Supplemental Table 17 for the definition of quality assessment ratings.

**SUPPLEMENTAL TABLE 22** Changes in Standardized Scores on CBT Interventions for ADHD

| Study (Companion);<br>N; Quality <sup>a</sup> ; Design;<br>Age Category | Intervention                                     | Comparison                                                              | Follow-up<br>Times | Findings—Intervention                                                                                                                                                                                                       | Findings—Comparison                                                                                                                                                                                                         | Between<br>Group <i>P</i>                                                                                                   |
|-------------------------------------------------------------------------|--------------------------------------------------|-------------------------------------------------------------------------|--------------------|-----------------------------------------------------------------------------------------------------------------------------------------------------------------------------------------------------------------------------|-----------------------------------------------------------------------------------------------------------------------------------------------------------------------------------------------------------------------------|-----------------------------------------------------------------------------------------------------------------------------|
| Nonpharmacologic versus nonpharmacologic<br>Boyer et al <sup>20</sup>   | CBT with an aim<br>to improve<br>planning skills | Solution-focused<br>CBT without an<br>aim to improve<br>planning skills | 3 mo               | ADHD symptom scale: combined inattentive and<br>hyperactivity and/or impulsivity<br>Mean = 18.66 (9.64)<br>Disruptive behavior disorders: summarized ODD/CD<br>subscales<br>Mean = 5.84 (5.49)                              | ADHD symptom scale: combined inattentive and<br>hyperactivity and/or impulsivity<br>Mean = 19.99 (9.69)<br>Disruptive behavior disorders: summarized ODD/CD<br>subscales<br>Mean = 5.99 (5.78)                              | <i>P</i> < .001                                                                                                             |
| RCT<br>Children aged<br>7–17 y                                          |                                                  |                                                                         | 12 mo              | ADHD symptom scale: combined inattentive and<br>hyperactivity and/or impulsivity<br>Mean = 18.41 (9.76)<br>Disruptive behavior disorders: summarized ODD/CD<br>subscales<br>Mean = 4.74 (4.30)                              | ADHD symptom scale: combined inattentive and<br>hyperactivity and/or impulsivity<br>Mean = 20.02 (8.21)<br>Disruptive behavior disorders: summarized ODD/CD<br>subscales<br>Mean = 4.55 (3.80)                              | <i>P</i> < .001                                                                                                             |
| Nonpharmacologic versus pharmacologic (NA)<br>Vidal et al <sup>73</sup> | CBT                                              | Usual care                                                              | 12 wk              | ADHD RS: adolescent inattention<br>Mean = 10.14 (0.51)<br>ADHD RS: adolescent impulsivity<br>Mean = 8.29 (0.7)<br>ADHD RS: parents inattention<br>Mean = 11.31 (0.58)<br>ADHD RS: parents impulsivity<br>Mean = 7.72 (0.77) | ADHD RS: adolescent inattention<br>Mean = 14.47 (0.5)<br>ADHD RS: adolescent impulsivity<br>Mean = 11.72 (0.7)<br>ADHD RS: parents inattention<br>Mean = 16.99 (0.6)<br>ADHD RS: parents impulsivity<br>Mean = 11.56 (0.78) | ES = 8.57 ( <i>P</i> < .001)<br>ES = 4.9 ( <i>P</i> < .001)<br>ES = 9.62 ( <i>P</i> < .001)<br>ES = 4.95 ( <i>P</i> < .001) |

ES, effect size; NA, not applicable; ODD/CD, oppositional defiant disorder/conduct disorder.

<sup>a</sup> See "Quality Assessment and Applicability of Individual Studies" for definitions of quality assessment ratings.



**SUPPLEMENTAL TABLE 23** Findings on CBT Interventions for ADHD

| Study (Companion); <i>N</i> ;<br>Quality <sup>a</sup> ; Design; Age Category                                                      | Intervention                                  | Comparison                                                           | Follow-up Times | Findings—Intervention                                                              | Findings—Comparison                                                                | Between Group <i>P</i>       |
|-----------------------------------------------------------------------------------------------------------------------------------|-----------------------------------------------|----------------------------------------------------------------------|-----------------|------------------------------------------------------------------------------------|------------------------------------------------------------------------------------|------------------------------|
| Nonpharmacologic versus<br>nonpharmacologic<br>Depression or anxiety<br>Boyer et al <sup>20</sup> (Boyer et<br>al <sup>21</sup> ) | CBT with an aim to improve<br>planning skills | Solution-focused CBT<br>without an aim to<br>improve planning skills | 3 mo            | Child depression inventory<br>Mean = 8.92 (6.82)                                   | Child depression inventory<br>Mean = 9.21 (5.57)                                   | <i>P</i> < .001              |
| 159<br>Fair<br>RCT                                                                                                                |                                               |                                                                      |                 | Screen for child anxiety<br>related emotional<br>disorders<br>Mean = 20.49 (16.17) | Screen for child anxiety<br>related emotional<br>disorders<br>Mean = 19.54 (18.17) | <i>P</i> < .001              |
| Children aged 7–17 y                                                                                                              |                                               |                                                                      |                 | Child depression inventory<br>Mean = 7.68 (5.10)                                   | Child depression inventory<br>Mean = 8.48 (4.65)                                   | <i>P</i> < .001              |
| Nonpharmacologic versus<br>pharmacologic (NA)                                                                                     |                                               |                                                                      | 12 mo           | Screen for child anxiety<br>related emotional<br>disorders<br>Mean = 18.86 (14.39) | Screen for child anxiety<br>related emotional<br>disorders<br>Mean = 18.53 (16.17) | <i>P</i> < .001              |
| Nonpharmacologic versus<br>placebo, usual care,<br>waitlist                                                                       |                                               |                                                                      |                 |                                                                                    |                                                                                    |                              |
| Functional impairment<br>Vidal et al <sup>23</sup>                                                                                | CBT                                           | Usual care                                                           | 12 wk           | CGI-S: self-report<br>Mean = 2.9 (0.12)                                            | CGI-S: self-report<br>Mean = 3.35 (0.12)                                           | ES = 3.75 ( <i>P</i> < .001) |
| 119<br>Good<br>RCT                                                                                                                |                                               |                                                                      |                 | CGI-S: clinician<br>Mean = 2.86 (0.07)                                             | CGI-S: clinician<br>Mean = 3.4 (0.07)                                              | ES = 7.71 ( <i>P</i> < .001) |
| Children aged 7–17 y                                                                                                              |                                               |                                                                      |                 |                                                                                    |                                                                                    |                              |

ES, effect size.

<sup>a</sup> See Supplemental Table 17 for the definition of quality assessment ratings.

**SUPPLEMENTAL TABLE 24** Changes in Standardized Scores on Child or Parent Training for ADHD

| Study (Companion);<br>N; Quality <sup>a</sup> ; Design;<br>Age Category | Intervention                                                                  | Comparison                     | Follow-up Times | Findings—Intervention                                                                                                                                                                                                                                      | Findings—Comparison                                                                                                                                                                                                                                               | Between<br>Group P |
|-------------------------------------------------------------------------|-------------------------------------------------------------------------------|--------------------------------|-----------------|------------------------------------------------------------------------------------------------------------------------------------------------------------------------------------------------------------------------------------------------------------|-------------------------------------------------------------------------------------------------------------------------------------------------------------------------------------------------------------------------------------------------------------------|--------------------|
| Nonpharmacologic versus nonpharmacologic                                |                                                                               |                                |                 |                                                                                                                                                                                                                                                            |                                                                                                                                                                                                                                                                   |                    |
| Bai et al <sup>16</sup>                                                 | A psychoeducation<br>program based<br>on the theory<br>of planned<br>behavior | General clinical<br>counseling | 3 mo            | ADHD RS IV<br>Mean = 33.7 (SD = 5.4)<br>(Baseline mean = 49.9, SD 11.5)                                                                                                                                                                                    | ADHD RS IV<br>Mean = 45.1 (SD = 7.9)<br>(Baseline mean = 48.1, SD = 8.1)                                                                                                                                                                                          | P = .008           |
| 89<br>Good<br>RCT<br>Children aged<br>7–17 y                            |                                                                               |                                |                 |                                                                                                                                                                                                                                                            |                                                                                                                                                                                                                                                                   |                    |
| Chacko et al <sup>22</sup>                                              | STEPP                                                                         | BPT program                    | 2.07 mo         | Disruptive behavior disorder scale: inattentive<br>Mean = 1.78 (SD = 0.63)<br>Disruptive behavior disorder: hyperactive and/or impulsive<br>Mean = 1.69 (SD = 0.57)<br>Treatment attitude inventory: satisfaction with outcome<br>Mean = 24.18 (SD = 3.02) | Disruptive behavior disorder scale: inattentive<br>Mean = 1.67 (SD = 0.74)<br>Disruptive behavior disorder: hyperactive and/<br>or impulsive<br>Mean = 1.59 (SD = 0.70)<br>Treatment attitude inventory: satisfaction with<br>outcome<br>Mean = 20.20 (SD = 2.35) | NR<br>NR<br>NR     |
| 120<br>Good<br>RCT<br>Children of all<br>ages ≤17 y                     |                                                                               |                                |                 |                                                                                                                                                                                                                                                            |                                                                                                                                                                                                                                                                   |                    |

TABLE 24. Continued

| Study (Companion);<br>N; Quality <sup>a</sup> ; Design;<br>Age Category | Intervention                              | Comparison                    | Follow-up Times | Findings—Intervention          | Findings—Comparison            | Between-Group P |
|-------------------------------------------------------------------------|-------------------------------------------|-------------------------------|-----------------|--------------------------------|--------------------------------|-----------------|
| Pfiffner et al <sup>62</sup>                                            | Child life and attention skills treatment | Parent group component only   | 10–13 wk        | Parent child symptom inventory | Parent child symptom inventory | P = .001        |
| 199                                                                     |                                           |                               |                 | Mean = 2.2 (SE = 0.3)          | Mean = 3.2 (SE = 0.3)          |                 |
| Good RCT                                                                |                                           |                               |                 | Child symptom inventory        | Child symptom inventory        | P < .001        |
|                                                                         |                                           |                               |                 | Mean = 2.99 (SE = 0.3)         | Mean = 4.2 (SE = 0.3)          |                 |
| Children aged 7–17 y                                                    |                                           | Evaluation and community care |                 | Parent child symptom inventory | Parent child symptom inventory | NR              |
|                                                                         |                                           |                               |                 | Child symptom inventory        | Child symptom inventory        | NR              |
|                                                                         |                                           |                               |                 | Mean = 4.1 (SE = 0.4)          | Mean = 5 (SE = 0.4)            | NR              |
|                                                                         |                                           |                               |                 | Parent child symptom inventory | Parent child symptom inventory | NR              |
|                                                                         |                                           |                               |                 | Child symptom inventory        | Child symptom inventory        | NR              |
|                                                                         |                                           |                               |                 | Mean = 3.2 (SE = 0.3)          | Mean = 4.2 (SE = 0.4)          | NR              |
|                                                                         |                                           |                               |                 | Parent child symptom inventory | Parent child symptom inventory | NR              |
|                                                                         |                                           |                               |                 | Child symptom inventory        | Child symptom inventory        | NR              |
|                                                                         |                                           |                               |                 | Mean = 4.2 (SE = 0.4)          | Mean = 4.1 (SE = 0.4)          | P < .001        |
|                                                                         |                                           |                               |                 | Parent child symptom inventory | Parent child symptom inventory | P = .396        |
|                                                                         |                                           |                               |                 | Child symptom inventory        | Child symptom inventory        | NR              |
|                                                                         |                                           |                               |                 | Mean = 2.2 (SE = 0.3)          | Mean = 4.2 (SE = 0.4)          | NR              |
|                                                                         |                                           |                               |                 | Child symptom inventory        | Child symptom inventory        | NR              |
|                                                                         |                                           |                               |                 | Mean = 3.7 (SE = 0.4)          | Mean = 4.1 (SE = 0.4)          | NR              |
|                                                                         |                                           |                               |                 | Parent child symptom inventory | Parent child symptom inventory | NR              |
|                                                                         |                                           |                               |                 | Child symptom inventory        | Child symptom inventory        | NR              |
|                                                                         |                                           |                               |                 | Mean = 4.2 (SE = 0.4)          | Mean = 4.2 (SE = 0.4)          | NR              |

**TABLE 24** Continued

| Study (Companion);<br>N; Quality <sup>a</sup> ; Design;<br>Age Category                                                                       | Intervention                                                                                          | Comparison                                                                                                                                              | Follow-up Times | Findings—Intervention                                                                                                                                                                                                                                                                                                                                                                                                                                                                                                                                                                                                                                                                                       | Findings—Comparison                                                                                                                                                                                                                                                                                                                                                                                                                                                                                                                                                                                                                                                                                               | Between<br>Group P                                                                   |
|-----------------------------------------------------------------------------------------------------------------------------------------------|-------------------------------------------------------------------------------------------------------|---------------------------------------------------------------------------------------------------------------------------------------------------------|-----------------|-------------------------------------------------------------------------------------------------------------------------------------------------------------------------------------------------------------------------------------------------------------------------------------------------------------------------------------------------------------------------------------------------------------------------------------------------------------------------------------------------------------------------------------------------------------------------------------------------------------------------------------------------------------------------------------------------------------|-------------------------------------------------------------------------------------------------------------------------------------------------------------------------------------------------------------------------------------------------------------------------------------------------------------------------------------------------------------------------------------------------------------------------------------------------------------------------------------------------------------------------------------------------------------------------------------------------------------------------------------------------------------------------------------------------------------------|--------------------------------------------------------------------------------------|
| Huang et al <sup>42</sup><br>97<br>Fair<br>RCT<br>Children aged<br>7–17 y                                                                     | Behavioral-based<br>social skill<br>training for<br>patients and<br>parallel parent<br>group sessions | Group therapy<br>for motivation<br>and<br>treatment<br>per usual<br>care, such as<br>medication<br>and<br>counseling at<br>the outpatient<br>department | 6 mo            | Change in CBCL withdrawn subscale<br>Mean = -0.84 (SD = 2.3)<br>Change in CBCL somatic complaints subscale<br>Mean within group change = -0.14 (SD = 2.7)<br>CBCL change anxious/depressed subscale<br>Mean within group change = -2.19 (SD = 4)<br>CBCL change social problems subscale<br>Mean within group change = -1.4 (SD = 2.3)<br>CBCL change thought problems subscale<br>Mean within group change = -1.02 (SD = 2.8)<br>CBCL change attention problems subscale<br>Mean within group change = -1.26 (SD = 2.8)<br>CBCL change delinquent behavior subscale<br>Mean within group change = -0.76 (SD = 2.2)<br>CBCL change aggressive behavior subscale<br>Mean within group change = -4 (SD = 7.1) | Change in CBCL withdrawn subscale<br>Mean = -0.28 (SD = 1.6)<br>Change in CBCL somatic complaints subscale<br>Mean within group change = -1.42 (SD = 3.7)<br>CBCL change anxious/depressed subscale<br>Mean within group change = -0.89 (SD = 3.7)<br>CBCL change social problems subscale<br>Mean within group change = -0.92 (SD = 2.2)<br>CBCL change thought problems subscale<br>Mean within group change = -1.06 (SD = 2.1)<br>CBCL change attention problems subscale<br>Mean within group change = -1.772 (SD = 3.2)<br>CBCL change delinquent behavior subscale<br>Mean within group change = -0.6 (SD = 1.9)<br>CBCL change aggressive behavior subscale<br>Mean within group change = -2.37 (SD = 5.9) | P = .84<br>P = .14<br>P = .79<br>P = .57<br>P = .60<br>P = .04<br>P = .91<br>P = .94 |
| Nonpharmacologic versus pharmacologic<br>Moreno-García<br>et al <sup>55</sup><br>57<br>Fair<br>RCT<br>Children aged<br>7–17 y                 | Standard<br>pharmacologic<br>treatment                                                                | Behavioral<br>treatment                                                                                                                                 | 20 wk           | IVA/CPT: full-scale attention mean = 2.1 (SD = 16.88)                                                                                                                                                                                                                                                                                                                                                                                                                                                                                                                                                                                                                                                       | IVA/CPT: full-scale attention mean = -3.88 (SD = 16.24)                                                                                                                                                                                                                                                                                                                                                                                                                                                                                                                                                                                                                                                           | P = .013                                                                             |
| Nonpharmacologic versus placebo, usual care, or waitlist<br>Chacko et al <sup>22</sup><br>120<br>Good<br>RCT<br>Children of all<br>ages ≤17 y | STEPP                                                                                                 | Waitlist                                                                                                                                                | 2.07 mo         | Disruptive behavior disorder scale: inattentive<br>Mean = 1.78 (SD = 0.63)<br>Disruptive behavior disorder: hyperactive and/or impulsive<br>Mean = 1.69 (SD = 0.57)                                                                                                                                                                                                                                                                                                                                                                                                                                                                                                                                         | Disruptive behavior disorder scale: inattentive<br>Mean = 1.72 (SD = 0.65)<br>Disruptive behavior disorder: hyperactive and/or impulsive<br>Mean = 1.72 (SD = 0.56)                                                                                                                                                                                                                                                                                                                                                                                                                                                                                                                                               | NR<br>NR                                                                             |



TABLE 24 Continued

| Study (Companion);<br>N; Quality <sup>a</sup> ; Design;<br>Age Category | Intervention                 | Comparison | Follow-up Times | Findings—Intervention                                                                                                                                                                                                                                   | Findings—Comparison                                                                                                                                                                                                                       | Between<br>Group P                |
|-------------------------------------------------------------------------|------------------------------|------------|-----------------|---------------------------------------------------------------------------------------------------------------------------------------------------------------------------------------------------------------------------------------------------------|-------------------------------------------------------------------------------------------------------------------------------------------------------------------------------------------------------------------------------------------|-----------------------------------|
| Ferrin et al <sup>32</sup><br>81<br>Good<br>RCT                         | Psychoeducational<br>program | Control    | 12 wk           | CPRS: inattention –12 wk<br>Mean = 7.95 (SD = 3.84) P = .001<br>CPRS: hyperactivity and/or impulsivity –12 wk<br>Mean = 6.74 (SD = 4.84)<br>CPRS: index<br>Mean = 18.6 (SD = 8.66)<br>CPRS: opposition subscale<br>Mean = 5.2 (SD = 4.06)               | CPRS: inattention –12 wk<br>Mean = 11 (SD = 3.28)<br>CPRS: hyperactivity and/or impulsivity –12 wk<br>Mean = 8.45 (SD = 4)<br>CPRS: index<br>Mean = 21.16 (SD = 7.08)<br>CPRS: opposition subscale<br>Mean = 5.63 (SD = 3.86)             | P = .001<br>NS                    |
| Children of all<br>ages ≤17 y                                           |                              |            | 12 mo           | CPRS: inattention and/or cognition<br>Mean = 8.26 (SD = 4.3) P = .032<br>CPRS: hyperactivity and/or impulsivity<br>Mean = 7.4 (SD = 4.84)<br>CPRS index –12 wk<br>Mean = 16.8 (SD = 7.18) P = .001<br>CPRS opposition –12 wk<br>Mean = 4.95 (SD = 3.79) | CPRS: inattention and/or cognition<br>Mean = 10.41 (SD = 3.62)<br>CPRS: hyperactivity and/or impulsivity<br>Mean = 8.47 (SD = 3.82)<br>CPRS index –12 wk<br>Mean = 22.44 (SD = 6.13)<br>CPRS opposition –12 wk<br>Mean = 6.18 (SD = 3.87) | P = .0032<br>NS<br>P = .001<br>NS |

BPT, Behavioral Parent Training; C, combined type; CPRS, Conners' Teaching Rating Scale; MPH, methylphenidate; NR, not reported; NS, not significant; STEPP, Strategies to Enhance Positive Parenting.

<sup>a</sup> See "Quality Assessment and Applicability of Individual Studies" for definitions of quality assessment ratings.

**SUPPLEMENTAL TABLE 25** Findings on Child or Parent Training or Behavioral Interventions for ADHD

| Study (Companion); #; Quality <sup>a</sup> ; Design;<br>Age Category                                    | Intervention                                    | Comparison                                            | Follow-up Times | Findings—Intervention                                                                                                                                                                           | Findings—Comparison                                                                                                                                                                             | Between Group <i>P</i>             |
|---------------------------------------------------------------------------------------------------------|-------------------------------------------------|-------------------------------------------------------|-----------------|-------------------------------------------------------------------------------------------------------------------------------------------------------------------------------------------------|-------------------------------------------------------------------------------------------------------------------------------------------------------------------------------------------------|------------------------------------|
| Nonpharmacologic versus<br>nonpharmacologic<br>Academic performance<br>Abikoff et al <sup>12</sup>      | Organizational skills                           | Performance-based<br>intervention precluding<br>skill | 12 wk           | Academic performance RS<br><br>Mean = pre: 53.45; post: 62.16<br>(SD = pre: 10.34; post: 10.52)<br>Academic proficiency scale<br>Mean = pre: 16.39; post: 18.55<br>(SD = pre: 4.27; post: 4.26) | Academic performance RS<br><br>Mean = pre: 54.45; post: 63.96 (SD =<br>pre: 11.12; post: 11.90)<br>Academic proficiency scale<br>Mean = pre: 17.08; post: 18.35 (SD =<br>pre: 3.54; post: 3.89) | NS                                 |
| Children aged 7–17 y<br>Acceptability of treatment<br>Chacko et al <sup>22</sup>                        | STEPP                                           | BPT program                                           | 2.07 mo         | Parent treatment attitude<br>inventory: satisfaction with<br>process<br>Mean = 16.36 (SD = 2.03)                                                                                                | Parent treatment attitude inventory:<br>satisfaction with process<br>Mean = 14.12 (SD = 2.09)                                                                                                   | <i>P</i> < .01                     |
| 120<br>Good<br>RCT<br>Children of all ages ≤17 y<br>Functional impairment<br>Chacko et al <sup>22</sup> | STEPP                                           | Waitlist                                              | 2.07 mo         | Impairment RS: overall<br>Mean = 3.31 (SD 1.41)                                                                                                                                                 | Impairment RS: overall<br>Mean = 4.11 (SD 1.67)                                                                                                                                                 | <i>P</i> < .01                     |
| 120<br>Good<br>RCT<br>Children of all ages ≤17 y<br>Pfiffner et al <sup>62</sup>                        | Child life and<br>attention skills<br>treatment | Parent group component<br>only                        | 10–13 wk        | Parent CGI                                                                                                                                                                                      | Parent CGI                                                                                                                                                                                      | <i>P</i> = .0                      |
| 199<br>Good<br>RCT<br>Children aged 7–17 y                                                              | Evaluation and community<br>care                | Evaluation and community<br>care                      |                 | Mean = 6 (SE = 0.7)<br>Teacher CGI severity<br>Mean = 5.8 (SE = 0.8)                                                                                                                            | Mean = 5.8 (SE = 0.9)<br>Teacher CGI severity<br>Mean = 5.2 (SE = 1)                                                                                                                            | <i>P</i> = .0                      |
|                                                                                                         | Parent group component<br>only                  | Parent group component<br>only                        | 5–7 mo          | Parent CGI<br>Mean = 6 (SE = 1)<br>Teacher CGI severity<br>Mean = 5 (SE = 1.1)                                                                                                                  | Parent CGI<br>Mean = 5 (SE = 1)<br>Teacher CGI severity<br>Mean = 5 (SE = 1.1)                                                                                                                  | NR<br>NR                           |
|                                                                                                         | Evaluation and community<br>care                | Evaluation and community<br>care                      |                 | Parent CGI<br>Mean = 3.4 (SE = 0.2)                                                                                                                                                             | Parent CGI<br>Mean = 5.8 (SE = 1)<br>Teacher CGI severity<br>Mean = 3.5 (SE = 0.2)                                                                                                              | <i>P</i> = .001<br><i>P</i> = .775 |





**TABLE 25** Continued

| Study (Companion); N, Quality <sup>a</sup> ; Design; Age Category                    | Intervention          | Comparison                                                                                                                                                                   | Follow-up Times | Findings—Intervention                                                                     | Findings—Comparison                                                                                                                                                                                                                                                     | Between Group P |
|--------------------------------------------------------------------------------------|-----------------------|------------------------------------------------------------------------------------------------------------------------------------------------------------------------------|-----------------|-------------------------------------------------------------------------------------------|-------------------------------------------------------------------------------------------------------------------------------------------------------------------------------------------------------------------------------------------------------------------------|-----------------|
| Molina et al <sup>54</sup> (Vitello et al <sup>14</sup> )                            | Medication management | Behavioral training (parent group, parent individual, classroom [student], and teacher sessions)<br>Combination: medication management and behavioral training               | 8 y             | Depression (CDI)<br><br>Mean = 5.78 (SD = 7.84)                                           | Depression (CDI)<br><br>Mean = 7.84 (SD = 7.24)                                                                                                                                                                                                                         | P = .1029       |
| 579                                                                                  |                       |                                                                                                                                                                              |                 |                                                                                           |                                                                                                                                                                                                                                                                         |                 |
| Fair RCT<br>Children aged 7–17 y                                                     |                       | Usual care                                                                                                                                                                   |                 | Anxiety (MASC)<br>Mean = 77.7 (SD = 14.9)                                                 | Anxiety (MASC)<br>Mean = 82.8 (SD = 16.7)<br>Depression (CDI)<br>Mean = 8 (SD = 7.66)<br>Anxiety (MASC)<br>Mean = 84.1 (SD = 18.3)<br>Depression (CDI)<br>Mean = 7.19 (SD = 7.73)<br>Anxiety (MASC)<br>Mean = 85.8 (SD = 19.7)                                          | P = .0217       |
| Elevated blood pressure<br>Molina et al <sup>54</sup> (Vitello et al <sup>14</sup> ) | Medication management | Behavioral training (parent group, parent individual, classroom [student], and teacher sessions)<br>Combination: medication management and behavioral training<br>Usual care | 8 y             | SBP at 14 mo<br><br>Mean = 102.4 (SD = 9.7)<br>DBP at 14 mo<br><br>Mean = 67.6 (SD = 9.6) | SBP at 14 mo<br><br>Mean = 103.2 (SD = 10.3)<br>DBP at 14 mo<br><br>Mean = 68.9 (SD = 9.1)<br>SBP at 14 mo<br>Mean = 102.6 (SD = 10.2)<br>DBP at 14 mo<br>Mean = 66.5 (SD = 10.4)<br>SBP at 14 mo<br>Mean = 104.1 (SD = 10.6)<br>DBP at 14 mo<br>Mean = 67.8 (SD = 8.8) | NS<br><br>NS    |
| 579                                                                                  |                       |                                                                                                                                                                              |                 |                                                                                           |                                                                                                                                                                                                                                                                         |                 |
| Fair RCT<br>Children aged 7–17 y                                                     |                       |                                                                                                                                                                              |                 |                                                                                           |                                                                                                                                                                                                                                                                         |                 |
| Incarceration<br>Molina et al <sup>54</sup> (Vitello et al <sup>14</sup> )           | Medication management | Behavioral training (parent group, parent individual, classroom [student], and teacher sessions)                                                                             | 8 y             | Arrested once                                                                             | Arrested once                                                                                                                                                                                                                                                           | P = .7350       |
| 579                                                                                  |                       |                                                                                                                                                                              |                 | % patients with outcome = 22.4                                                            | % patients with outcome = 17.4                                                                                                                                                                                                                                          |                 |

TABLE 25 Continued

| Study (Companion); #; Quality <sup>a</sup> ; Design;<br>Age Category                   | Intervention          | Comparison                                                                                       | Follow-up Times | Findings—Intervention                                                                                                                                                                                                                        | Findings—Comparison                                                                                                                                                                                                          | Between Group P |
|----------------------------------------------------------------------------------------|-----------------------|--------------------------------------------------------------------------------------------------|-----------------|----------------------------------------------------------------------------------------------------------------------------------------------------------------------------------------------------------------------------------------------|------------------------------------------------------------------------------------------------------------------------------------------------------------------------------------------------------------------------------|-----------------|
| Fair                                                                                   |                       | Combination: medication management and behavioral training                                       |                 | $P = .735$                                                                                                                                                                                                                                   | Arrested 2 or more times                                                                                                                                                                                                     |                 |
| RCT                                                                                    |                       |                                                                                                  |                 | Arrested 2 or more times<br>% patients with outcome = 10.3<br>$P = .735$                                                                                                                                                                     | % patients with outcome = 7.8                                                                                                                                                                                                |                 |
| Children aged 7–17 y                                                                   |                       | Usual care                                                                                       |                 |                                                                                                                                                                                                                                              | Arrested once<br>% patients with outcome = 18.9<br>Arrested 2 or more times<br>% patients with outcome = 5.7<br>Arrested once<br>% patients with outcome = 22.9<br>Arrested 2 or more times<br>% patients with outcome = 7.8 |                 |
| Increased heart rate<br>Molina et al <sup>54</sup> (Vitiello et al <sup>74</sup> )     | Medication management | Behavioral training (parent group, parent individual, classroom [student], and teacher sessions) | 8 y             | Heart rate at 14 mo                                                                                                                                                                                                                          | Heart rate at 14 mo                                                                                                                                                                                                          | NS              |
| 579                                                                                    |                       | Combination: medication management and behavioral training                                       |                 | Mean = 84.2 (SD = 12.4)<br>Incidence of tachycardia at 14 mo                                                                                                                                                                                 | Mean = 79.1 (SD = 12)<br>Incidence of tachycardia at 14 mo                                                                                                                                                                   | NS              |
| Fair<br>RCT                                                                            |                       | Usual care                                                                                       |                 | % patients with outcome = 0.8                                                                                                                                                                                                                | % patients with outcome = 0.8                                                                                                                                                                                                |                 |
| Children aged 7–17 y                                                                   |                       |                                                                                                  |                 | Heart rate at 14 mo<br>Mean = 84.6 (SD = 12.2)<br>Incidence of tachycardia at 14 mo<br>% patients with outcome = 2.2<br>Heart rate at 14 mo<br>Mean = 78.9 (SD = 12.9)<br>Incidence of tachycardia at 14 mo<br>% patients with outcome = 2.5 |                                                                                                                                                                                                                              |                 |
| Motor vehicle collisions<br>Molina et al <sup>54</sup> (Vitiello et al <sup>74</sup> ) | Medication management | Behavioral training (parent group, parent individual, classroom [student], and teacher sessions) | 8 y             | Accidents, citations, ticket                                                                                                                                                                                                                 | Accidents, citations, ticket                                                                                                                                                                                                 | $P = .6691$     |
| 579                                                                                    |                       | Combination: medication management and behavioral training                                       |                 | % patients with outcome = 28.6<br>Accidents, citations, ticket                                                                                                                                                                               | % patients with outcome = 19.7<br>Accidents, citations, ticket                                                                                                                                                               |                 |
| Fair                                                                                   |                       |                                                                                                  |                 |                                                                                                                                                                                                                                              | % patients with outcome = 19                                                                                                                                                                                                 |                 |

TABLE 25 Continued

| Study (Companion); N, Quality <sup>a</sup> ; Design; Age Category                                                                                                         | Intervention                                                   | Comparison                                                 | Follow-up Times | Findings—Intervention                                                                                                                                                                  | Findings—Comparison                                                                                                                                                                                                                                | Between Group P |
|---------------------------------------------------------------------------------------------------------------------------------------------------------------------------|----------------------------------------------------------------|------------------------------------------------------------|-----------------|----------------------------------------------------------------------------------------------------------------------------------------------------------------------------------------|----------------------------------------------------------------------------------------------------------------------------------------------------------------------------------------------------------------------------------------------------|-----------------|
| RCT<br>Children aged 7–17 y<br>Nonpharmacologic versus placebo, usual care, or waitlist<br>Academic performance<br>Abikoff et al <sup>12</sup><br>180                     | Organizational skills                                          | Usual care<br>Waitlist                                     | 12 wk           | Academic performance RS<br>Mean = pre: 53.45; post: 62.16 (SD = pre: 10.34; post: 10.52)<br>Academic proficiency scale<br>Mean = pre: 16.39; post: 18.55 (SD = pre: 4.27; post: 4.26)  | Accidents, citations, ticket % patients with outcome = 21.5<br>Academic performance RS<br>Mean = pre: 54.06; post: 54.53 (SD = pre: 8.58; post: 9.74)<br>Academic proficiency scale<br>Mean = pre: 16.05; post: 16.63 (SD = pre: 3.22; post: 3.30) | NS              |
| Children aged 7–17 y<br>Storebø et al <sup>70</sup>                                                                                                                       | Social skills group and medication management                  | Medication management (usual care)                         | 3 mo            | Connors CBRS academic score mean = 20.13 (SD = 15.15)                                                                                                                                  | Connors CBRS academic score mean = 17.88 (SD = 10.11)                                                                                                                                                                                              | NS              |
| 56                                                                                                                                                                        |                                                                |                                                            | 6 mo            | Connors CBRS academic score mean = 21.04 (SD = 11.98); between group MD: -0.48 (95% CI = -7.254 to 6.293)                                                                              | Connors CBRS academic score mean = 21.52 (SD 12.56)                                                                                                                                                                                                |                 |
| Good<br>RCT<br>Children aged 7–17 y<br>Depression or anxiety<br>Hiscock et al <sup>39</sup> (Papadopoulos et al <sup>60</sup> )                                           | Sleep hygiene practices and standardized behavioral strategies | Children in the control group received usual clinical care | 6 mo            | Depression or anxiety: depression anxiety stress scale<br>Mean = 31.3 (SD = 23.6)<br>Depression or anxiety: parent mental health with the depression anxiety stress scale, total score | Depression or anxiety: depression anxiety stress scale<br>Mean = 33.9 (SD = 28.5)                                                                                                                                                                  | P = .55         |
| 244                                                                                                                                                                       |                                                                |                                                            |                 |                                                                                                                                                                                        |                                                                                                                                                                                                                                                    |                 |
| Good<br>RCT<br>Children of all ages ≤17 y<br>Functional impairment<br>Chacko et al <sup>22</sup><br>120<br>Good<br>RCT<br>Children of all ages ≤17 y<br>Sleep disturbance | STEPP                                                          | Waitlist                                                   | 2.07 mo         | Impairment RS: overall<br>Mean = 3.31 (SD 1.41)                                                                                                                                        | Impairment RS: overall<br>Mean = 4.65 (SD 1.30)                                                                                                                                                                                                    | NR              |

TABLE 25 Continued

| Study (Companion); #; Quality <sup>a</sup> ; Design;<br>Age Category                                               | Intervention                                                   | Comparison                                                 | Follow-up Times | Findings—Intervention                                                              | Findings—Comparison                                                                | Between Group <i>P</i>                    |
|--------------------------------------------------------------------------------------------------------------------|----------------------------------------------------------------|------------------------------------------------------------|-----------------|------------------------------------------------------------------------------------|------------------------------------------------------------------------------------|-------------------------------------------|
| Hiscock et al <sup>39</sup>                                                                                        | Sleep hygiene practices and standardized behavioral strategies | Children in the control group received usual clinical care | 6 mo            | Sleep disturbance: Child Sleep Habits Questionnaire total score, mean = 53.2 (7.5) | Sleep disturbance: Child Sleep Habits Questionnaire total score, mean = 55.9 (8.8) | <i>P</i> < .001                           |
| (Papadopoulos et al <sup>60</sup> )<br>244<br>Good<br>RCT<br>Children of all ages ≤17 y<br>Workforce participation |                                                                |                                                            |                 |                                                                                    |                                                                                    |                                           |
| Hiscock et al <sup>39</sup> (Papadopoulos et al <sup>60</sup> )                                                    | Sleep hygiene practices and standardized behavioral strategies | Children in the control group received usual clinical care | 3 mo            | Workforce participation: d late for work                                           | —                                                                                  | <i>P</i> = .02                            |
| 244<br>Good<br>RCT<br>Children of all ages ≤17 y                                                                   |                                                                |                                                            |                 | Workforce participation: missed d of work                                          |                                                                                    | <i>P</i> = .03 (both nonparametric tests) |

BPT, Behavioral Parent Training; CBRS, Comprehensive Behavior Rating Scale; CDI, Children's Depression Inventory; CI, confidence interval; DBP, diastolic blood pressure; GPA, grade point average; MASC, Multidimensional Anxiety Scale for Children;

NR, not reported; NS, not significant; SBP, systolic blood pressure; STEPP, Strategies to Enhance Positive Parenting; WIAT, Wechsler Individual Achievement Test. —, not applicable.

<sup>a</sup> See Supplemental Table 17 for the definition of quality assessment ratings.

**SUPPLEMENTAL TABLE 26** Findings on Omega-3 Fatty Acid Supplementation for ADHD

| Study (Companion); #; Quality <sup>a</sup> ; Design; Age Category                   | Intervention                                         | Comparison | Follow-up Times           | Findings—Intervention                                | Findings—Comparison                                  | Between Group P |
|-------------------------------------------------------------------------------------|------------------------------------------------------|------------|---------------------------|------------------------------------------------------|------------------------------------------------------|-----------------|
| Nonpharmacologic versus nonpharmacologic (NA)                                       |                                                      |            |                           |                                                      |                                                      |                 |
| Nonpharmacologic versus placebo, usual care, or waitlist                            |                                                      |            |                           |                                                      |                                                      |                 |
| Behavior changes<br>Manor et al <sup>47</sup> (Manor et al <sup>48</sup> )          | Phosphatidylserine enriched with omega-3 fatty acids | Placebo    | 15 wk                     | Euphoric                                             | Euphoric                                             | NR              |
| 200                                                                                 |                                                      |            |                           | % patients with outcome = 38.9<br>Anxiety            | % patients with outcome = 34.6<br>Anxiety            | NR              |
| Good RCT                                                                            |                                                      |            |                           | % patients with outcome = 45<br>Irritable            | % patients with outcome = 63.5<br>Irritable          | NR              |
| Children aged 7–17 y                                                                |                                                      |            |                           | % patients with outcome = 79.1<br>Prone cry          | % patients with outcome = 84.6<br>Prone cry          | NR              |
|                                                                                     |                                                      |            |                           | % patients with outcome = 62.7<br>Talk less          | % patients with outcome = 57.7<br>Talk less          | NR              |
|                                                                                     |                                                      |            |                           | % patients with outcome = 31.8<br>Sad and/or unhappy | % patients with outcome = 32.7<br>Sad and/or unhappy | NR              |
|                                                                                     |                                                      |            |                           | % patients with outcome = 40<br>Irritability         | % patients with outcome = 34<br>Irritability         | NR              |
|                                                                                     |                                                      |            |                           | % patients with outcome = 15.31                      | % patients with outcome = 11.63                      | NR              |
| Elevated blood pressure                                                             |                                                      |            |                           |                                                      |                                                      |                 |
| Manor et al <sup>47</sup> (Manor et al <sup>48</sup> )                              | Phosphatidylserine enriched with omega-3 fatty acids | Placebo    | 15 wk                     | Systolic                                             | Systolic                                             | P = .955        |
| 200                                                                                 |                                                      |            |                           | Mean = 103.6 (SD = 14.82)                            | Mean = 100.25 (SD = 12.95)                           |                 |
| Good RCT                                                                            |                                                      |            |                           | Diastolic                                            | Diastolic                                            | P = .342        |
| Children aged 7–17 y                                                                |                                                      |            |                           | Mean = 64.66 (SD = 11.39)                            | Mean = 63.89 (SD = 10.28)                            |                 |
| Functional impairment<br>Johnson et al <sup>43</sup> (Johnson et al <sup>44</sup> ) | Omega-3/6 fatty acid supplementation (792 mg daily)  | Placebo    | 3 mo (double-blind phase) | CGI score                                            | CGI score                                            | NS              |
| 75                                                                                  |                                                      |            |                           | Mean change = -0.58 (0.87)                           | Mean change = -0.13 (0.50)                           | NS              |
|                                                                                     |                                                      |            |                           | CGI score                                            | CGI score                                            |                 |
|                                                                                     |                                                      |            |                           | Mean change = -1.24 (1.07)                           | Mean change = -0.93 (0.92)                           |                 |
| Good RCT                                                                            |                                                      |            |                           |                                                      |                                                      |                 |
| Children aged 7–17 y                                                                |                                                      |            |                           |                                                      |                                                      |                 |
| Sleep disturbance                                                                   |                                                      |            |                           |                                                      |                                                      |                 |

TABLE 26 Continued

| Study (Companion); #; Quality <sup>a</sup> ; Design; Age Category | Intervention                                         | Comparison | Follow-up Times | Findings—Intervention                                         | Findings—Comparison                                           | Between Group P |
|-------------------------------------------------------------------|------------------------------------------------------|------------|-----------------|---------------------------------------------------------------|---------------------------------------------------------------|-----------------|
| Manor et al <sup>47</sup> (Manor et al <sup>48</sup> )            | Phosphatidylserine enriched with omega-3 fatty acids | Placebo    | 15 wk           | Insomnia                                                      | Insomnia                                                      | NR              |
| 200<br>Good<br>RCT                                                |                                                      |            |                 | % patients with outcome = 38.2<br>Severe insomnia             | % patients with outcome = 53.9<br>Severe insomnia             | NR              |
| Children aged 7–17 y                                              |                                                      |            |                 | Nightmares                                                    | Nightmares                                                    | NR              |
| Tics or other movement disorders                                  |                                                      |            |                 | % patients with outcome = 29.1                                | % patients with outcome = 34.6                                |                 |
| Manor et al <sup>47</sup> (Manor et al <sup>48</sup> )            | Phosphatidylserine enriched with omega-3 fatty acids | Placebo    | 15 wk           | Tics                                                          | Tics                                                          | NR              |
| 200<br>Good<br>RCT                                                |                                                      |            |                 | % patients with outcome = 22.7                                | % patients with outcome = 32.7                                |                 |
| Children aged 7–17 y                                              |                                                      |            |                 |                                                               |                                                               |                 |
| Gastrointestinal symptoms                                         |                                                      |            |                 |                                                               |                                                               |                 |
| Manor et al <sup>47</sup> (Manor et al <sup>48</sup> )            | Phosphatidylserine enriched with omega-3 fatty acids | Placebo    | 15 wk           | Stomachaches                                                  | Stomachaches                                                  | NR              |
| 200<br>Good<br>RCT                                                |                                                      |            |                 | % patients with outcome = 39.5<br>Decreased appetite          | % patients with outcome = 46.2<br>Decreased appetite          | NR              |
| Children aged 7–17 y                                              |                                                      |            |                 | % patients with outcome = 32.7<br>Severely decreased appetite | % patients with outcome = 32.7<br>Severely decreased appetite | NR              |
| Growth suppression                                                |                                                      |            |                 | % patients with outcome = 4.08                                | % patients with outcome = 4.65                                | NR              |
| Manor et al <sup>47</sup> (Manor et al <sup>48</sup> )            | Phosphatidylserine enriched with omega-3 fatty acids | Placebo    | 15 wk           | Height in cm                                                  | Height in cm                                                  | P = .196        |
| 200<br>Good<br>RCT                                                |                                                      |            |                 | Mean = 135.25 (SD = 13.35)                                    | Mean = 136.77 (SD = 12.26)                                    |                 |
| Children aged 7–17 y                                              |                                                      |            |                 |                                                               |                                                               |                 |
| Increased heart rate                                              |                                                      |            |                 | Increased heart rate                                          | Increased heart rate                                          | P = .825        |
| Manor et al <sup>47</sup> (Manor et al <sup>48</sup> )            | Phosphatidylserine enriched with omega-3 fatty acids | Placebo    | 15 wk           | Mean = 79.72 (SD = 12.03)                                     | Mean = 81.18 (SD = 13.24)                                     |                 |
| 200<br>Good<br>RCT                                                |                                                      |            |                 |                                                               |                                                               |                 |
| Children aged 7–17 y                                              |                                                      |            |                 |                                                               |                                                               |                 |
| Personality change                                                |                                                      |            |                 |                                                               |                                                               |                 |

TABLE 26 Continued

| Study (Companion); N, Quality <sup>a</sup> ; Design; Age Category                                    | Intervention                                         | Comparison                                                                          | Follow-up Times | Findings—Intervention                                             | Findings—Comparison                                                        | Between Group P |
|------------------------------------------------------------------------------------------------------|------------------------------------------------------|-------------------------------------------------------------------------------------|-----------------|-------------------------------------------------------------------|----------------------------------------------------------------------------|-----------------|
| Manor et al <sup>47</sup> (Manor et al <sup>48</sup> )                                               | Phosphatidylserine enriched with omega-3 fatty acids | Placebo                                                                             | 15 wk           | Uninterested                                                      | Uninterested                                                               | NR              |
| 200<br>Good<br>RCT<br>Children aged 7–17 y<br>Wt decrease                                            |                                                      |                                                                                     |                 | % patients with outcome = 32.7                                    | % patients with outcome = 38                                               |                 |
| Manor et al <sup>47</sup> (Manor et al <sup>48</sup> )                                               | Phosphatidylserine enriched with omega-3 fatty acids | Placebo                                                                             | 15 wk           | Wt (kg)                                                           | Wt (kg)                                                                    | P = .980        |
| 200<br>Good<br>RCT<br>Children aged 7–17 y<br>Nonpharmacologic versus pharmacologic Behavior changes |                                                      |                                                                                     |                 | Mean = 33.39 (SD = 10.61)                                         | Mean = 33.06 (SD = 8.42)                                                   |                 |
| Barragan et al <sup>17</sup>                                                                         | MPH (maximum 1 mg/kg per d)                          | Omega-3/6 fatty acid supplementation (6 capsules/d)                                 | 1 y             | Irritability by the end of the study period (clinical assessment) | Irritability by the end of the study period (clinical assessment)          | NR              |
| 90<br>Poor                                                                                           |                                                      | MPH (maximum 1 mg/kg per d and omega-3/6 fatty acid supplementation [6 capsules/d]) |                 | % patients with outcome = 23.33                                   | % patients with outcome = 0                                                |                 |
| RCT                                                                                                  |                                                      |                                                                                     |                 |                                                                   | Irritability by the end of the study period<br>% patients with outcome = 0 |                 |
| Children aged 7–17 y<br>Changes in appetite                                                          | MPH (maximum 1 mg/kg per d)                          | Omega-3/6 fatty acid supplementation (6 capsules/d)                                 | 1 y             | Appetite suppression by the end of the study period               | Appetite suppression by the end of the study period                        | NR              |
| Barragan et al <sup>17</sup>                                                                         |                                                      |                                                                                     |                 | % patients with outcome = 70                                      | % patients with outcome = 33.3                                             |                 |
| 90<br>Poor                                                                                           |                                                      | MPH (maximum 1 mg/kg per d and omega-3/6 fatty acid supplementation [6 capsules/d]) |                 |                                                                   | Appetite suppression by the end of the study period                        |                 |
| RCT                                                                                                  |                                                      |                                                                                     |                 |                                                                   |                                                                            |                 |





TABLE 26 Continued

| Study (Companion); <sup>a</sup> M, Quality; <sup>b</sup> Design; Age Category | Intervention                                                                        | Comparison                                                                          | Follow-up Times | Findings—Intervention                   | Findings—Comparison                                                    | Between Group P |
|-------------------------------------------------------------------------------|-------------------------------------------------------------------------------------|-------------------------------------------------------------------------------------|-----------------|-----------------------------------------|------------------------------------------------------------------------|-----------------|
| Barragan et al <sup>17</sup>                                                  | MPH (maximum 1 mg/kg per d)                                                         | Omega-3/6 fatty acid supplementation (6 capsules/d)                                 | 1 y             | Insomnia by the end of the study period | Insomnia by the end of the study period                                | NR              |
| 90                                                                            | MPH (maximum 1 mg/kg per d and omega-3/6 fatty acid supplementation [6 capsules/d]) | MPH (maximum 1 mg/kg per d and omega-3/6 fatty acid supplementation [6 capsules/d]) |                 | % patients with outcome = 20            | % patients with outcome = 0                                            |                 |
| Poor RCT                                                                      |                                                                                     |                                                                                     |                 |                                         | Insomnia by the end of the study period<br>% patients with outcome = 0 |                 |
| Children aged 7–17 y                                                          |                                                                                     |                                                                                     |                 |                                         |                                                                        |                 |

MPH, methylphenidate; NA, not applicable; NR, not reported; NS, not significant.

<sup>a</sup> See Supplemental Table 17 for the definition of quality assessment ratings.

**SUPPLEMENTAL TABLE 27** Changes in Standardized Scores on Herbal Interventions or Dietary Approaches for ADHD

| Study (Companion); <i>N</i> ; Quality <sup>a</sup> ; Design; Age Category | Intervention                | Comparison          | Follow-up Times                 | Findings—Intervention                                                                 | Findings—Comparison                                                                                                                                | Between Group <i>P</i> |
|---------------------------------------------------------------------------|-----------------------------|---------------------|---------------------------------|---------------------------------------------------------------------------------------|----------------------------------------------------------------------------------------------------------------------------------------------------|------------------------|
| Nonpharmacologic versus nonpharmacologic Peisser et al <sup>61</sup>      | Restricted elimination diet | No elimination diet | 5 wk after intervention started | ADHD RS: parental total score<br>Mean 24.2; 95% CI = 19.5 to 29.0                     | ADHD RS: parental total score<br>Mean 1.3; 95% CI = 0.2 to 2.5<br>Mean between group change = 23.7<br>95% CI = 18.6 to 28.8                        | <i>P</i> < .0001       |
| 100<br>Good<br>RCT                                                        |                             |                     |                                 | ADHD RS: teacher total score<br>Mean 14.3; 95% CI = 11.6 to 17.1                      | ADHD RS: teacher total score<br>Mean -0.4; 95% CI = -1.7 to 1.0                                                                                    |                        |
| Children of all ages<br>≤17 y                                             |                             |                     |                                 | ADHD RS: parent inattention score<br>Mean 11.3; 95% CI = 8.9 to 13.8                  | ADHD RS: parent inattention score<br>Mean 0.2; 95% CI = -0.4 to 0.8<br>Mean between group change = 11.8<br>95% CI = 12.0 to 18.6                   | <i>P</i> < .0001       |
|                                                                           |                             |                     |                                 | ADHD RS: parent hyperactivity and impulsivity score<br>Mean 12.9; 95% CI 10.5 to 15.3 | ADHD RS: parent hyperactivity and impulsivity score<br>Mean 0.3; 95% CI = -0.6 to 1.1<br>Mean between group change = 11.9<br>95% CI = 9.1 to 14.4  | <i>P</i> < .0001       |
|                                                                           |                             |                     |                                 | ADHD RS: teacher hyperactivity and impulsivity score<br>Mean 7.8; 95% CI = 6.2 to 9.5 | ADHD RS: teacher hyperactivity and impulsivity score<br>Mean -0.6; 95% CI = -1.4 to 0.2<br>Mean between group change = 8.5<br>95% CI = 6.8 to 10.3 | <i>P</i> < .0001       |
|                                                                           |                             |                     |                                 | Abbreviated Conners scale: parent<br>Mean 12.0; 95% CI = 9.4 to 14.6                  | Abbreviated Conners scale: parent<br>Mean 0.1; 95% CI = -0.7 to 0.8<br>Mean between group change = 11.8<br>95% CI = 9.2 to 14.5                    | <i>P</i> < .0001       |
|                                                                           |                             |                     |                                 | Abbreviated Conners scale: teacher<br>Mean 6.6; 95% CI = 4.9 to 8.4                   | Abbreviated Conners scale: teacher<br>Mean -0.8; 95% CI = -1.4 to -0.3<br>Mean between group change = 7.5<br>95% CI = 5.9 to 6.2                   | <i>P</i> < .0001       |
|                                                                           |                             |                     |                                 | ADHD RS: "behavior scores"<br>Total score<br>Mean = 9.6 (SD = 6.9)                    | ADHD RS "behavior scores"<br>Total score<br>Mean = 46.9 (SD = 5.5)                                                                                 |                        |
|                                                                           |                             |                     |                                 | ADHD RS: "behavior scores"                                                            | ADHD RS "behavior scores"<br>inattention                                                                                                           |                        |



| Study (Companion); #;<br>Quality <sup>a</sup> , Design; Age Category                                                | Intervention                                                                                                  | Comparison                    | Follow-up Times | Findings—Intervention                                                                                                                                            | Findings—Comparison                                                                                                                                              | Between Group P                       |
|---------------------------------------------------------------------------------------------------------------------|---------------------------------------------------------------------------------------------------------------|-------------------------------|-----------------|------------------------------------------------------------------------------------------------------------------------------------------------------------------|------------------------------------------------------------------------------------------------------------------------------------------------------------------|---------------------------------------|
| RCT                                                                                                                 |                                                                                                               |                               |                 | Mean within group change = 12.3 (SD = 3.1)                                                                                                                       | Mean within group change = 13.9 (SD = 2.3)                                                                                                                       | NR                                    |
| Children aged 7–17 y<br>Salehi et al <sup>65</sup>                                                                  | MPH (up to 30 mg/d)                                                                                           | Ginkgo biloba                 | 6 wk            | Parent ADHD RS IV<br>Mean = 26; 95% CI = 13 to 38<br>Teacher ADHD RS IV<br>Mean = 25; 95% CI = 15 to 35                                                          | Parent ADHD RS IV<br>Mean = 16; 95% CI = 5 to 27<br>Teacher ADHD RS IV<br>Mean = 11; 95% CI = 4 to 20                                                            | P < .01<br>P < .001                   |
| Good<br>RCT                                                                                                         |                                                                                                               |                               |                 |                                                                                                                                                                  |                                                                                                                                                                  |                                       |
| Children aged 7–17 y<br>Nonpharmacologic versus<br>placebo, usual care, or<br>waitlist<br>Dutta et al <sup>27</sup> | Memomet synup (Bacopa<br>monniera 125 mg,<br>Convulvulus pleuricaulis<br>100 mg, Centella asiatica<br>100 mg) | Placebo                       | 4 mo            | Conners' 10-point RS (hyperactivity)                                                                                                                             | Conners' 10-point RS (hyperactivity)                                                                                                                             | Reported as<br>significant in<br>text |
| 86<br>Good<br>RCT                                                                                                   |                                                                                                               |                               |                 | Mean percent change 48%                                                                                                                                          | Mean percent change 29%                                                                                                                                          |                                       |
| Children aged 7–17 y<br>Mohammadpour et al <sup>62</sup>                                                            | 2000 IU vitamin D plus MPH                                                                                    | Placebo vitamin D<br>plus MPH | 2 d             | CPRS oppositional                                                                                                                                                | CPRS oppositional                                                                                                                                                | NR                                    |
| 54<br>Fair<br>RCT                                                                                                   |                                                                                                               |                               |                 | Mean = 55.28 (SD 11.6)<br>CPRS cognitive<br>Mean = 56 (SD 11.8)<br>CPRS hyperactive                                                                              | Mean = 59.76 (SD 12.1)<br>CPRS cognitive<br>Mean = 57.21 (SD 10.5)<br>CPRS hyperactive                                                                           | NR<br>NR<br>NR                        |
| Children of all ages<br>≤17 y                                                                                       |                                                                                                               |                               |                 | Mean = 56.92 (SD 11.8)<br>CPRS ADHD index<br>Mean = 55.84 (SD 10.2)<br>ADHD RS: inattentive<br>Mean = 49.80 (SD 31.7)<br>ADHD RS: hyperactive and/or impulsive   | Mean = 59.79 (SD 12.4)<br>CPRS ADHD index<br>Mean = 56.79 (SD 9.6)<br>ADHD RS: inattentive<br>Mean = 61.37 (SD 29.5)<br>ADHD RS: hyperactive and/or<br>impulsive | NR<br>NR<br>NR<br>NR                  |
|                                                                                                                     |                                                                                                               |                               |                 | Mean = 69.40 (SD 22.4)<br>ADHD RS: total score<br>Mean = 60.44 (SD 22.1)<br>SNAP parent DSM IV ADHD symptoms                                                     | Mean = 77.44 (SD 19.5)<br>ADHD RS: total score<br>Mean = 71.75 (SD 23.6)<br>SNAP parent DSM IV ADHD symptoms                                                     | NR<br>NR<br>NR                        |
| Arnold et al <sup>15</sup>                                                                                          | Zinc 15 mg once daily (>8<br>wk with amphetamine in<br>all groups)                                            | Placebo                       | 8 wk            | SNAP parent DSM IV ADHD symptoms                                                                                                                                 | SNAP parent DSM IV ADHD symptoms                                                                                                                                 | NR                                    |
| 52<br>Fair<br>RCT                                                                                                   |                                                                                                               |                               |                 | Mean = 1.92 (SD = 0.54)<br>GRS: parent<br>Mean = 1.95 (SD = 0.49)<br>GRS: teacher; zinc versus placebo<br>Mean = 1.90 (0.67)<br>SNAP parent DSM IV ADHD symptoms | Mean = 1.9 (SD = 0.63)<br>GRS: parent<br>Mean = 1.84 (0.56)<br>GRS: teacher; zinc versus placebo<br>Mean = 1.71 (SD = 0.79)<br>SNAP parent DSM IV ADHD symptoms  | NR<br>NR<br>NR<br>NR                  |
| Children aged 7–17 y                                                                                                |                                                                                                               |                               | 10 wk           |                                                                                                                                                                  |                                                                                                                                                                  | NR                                    |

TABLE 27 Continued

| Study (Companion); <i>N</i><br>Quality <sup>a</sup> ; Design; Age Category | Intervention | Comparison | Follow-up Times | Findings—Intervention                                        | Findings—Comparison                                     | Between Group <i>P</i> |
|----------------------------------------------------------------------------|--------------|------------|-----------------|--------------------------------------------------------------|---------------------------------------------------------|------------------------|
|                                                                            |              |            |                 | Mean = 1.61 (SD = 0.52)<br>CRS: parent                       | Mean = 1.47 (0.51)<br>CRS: parent                       |                        |
|                                                                            |              |            |                 | Mean = 1.52 (SD = 0.52)<br>CRS: teacher; zinc versus placebo | Mean = 1.24 (0.5)<br>CRS: teacher; zinc versus placebo  | NR                     |
|                                                                            |              |            |                 | Mean = 1.23 (SD = 0.58)<br>SNAP parent DSM IV ADHD symptoms  | Mean = 1.40 (0.81)<br>SNAP parent DSM IV ADHD symptoms  | NR                     |
| 13 wk                                                                      |              |            |                 | Mean = 1.19 (0.56)<br>CRS: parent                            | Mean = 1.01 (SD = 0.38)<br>CRS: parent                  | NR                     |
|                                                                            |              |            |                 | Mean = 1.08 (SD = 0.45)<br>CRS: teacher; zinc versus placebo | Mean = 0.91 (0.43)<br>CRS: teacher; zinc versus placebo | NR                     |
|                                                                            |              |            |                 | Mean = 0.9 (SD = 0.65)<br>SNAP parent DSM IV ADHD symptoms   | Mean = 0.63 (0.58)<br>SNAP parent DSM IV ADHD symptoms  |                        |
| 21 wk                                                                      |              |            |                 | Mean = 0.99 (SD = 0.52)<br>CRS: parent                       | Mean = 0.82 (0.44)<br>CRS: parent                       | NR                     |
|                                                                            |              |            |                 | Mean = 0.83 (SD = 0.47)<br>CRS: teacher; zinc versus placebo | Mean = 0.72 (0.52)<br>CRS: teacher; zinc versus placebo | NR                     |
|                                                                            |              |            |                 | Mean = 1.17 (SD = 0.53)                                      | Mean = 0.94 (0.69)                                      | NR                     |

CI, confidence interval; CRS, Conners Rating Scale; DSM IV, Diagnostic and Statistical Manual of Mental Disorders IV; IU, international unit; MPH, methylphenidate; NR, not reported; SNAP, Swanson, Nolan and Pelham Revision.

<sup>a</sup> See "Quality Assessment and Applicability of Individual Studies" for definitions of quality assessment ratings.



TABLE 28 Continued

| Study; N; Quality <sup>a</sup> ; Design; Age Category                                                       | Intervention                                                 | Comparison                                                    | Follow-up Times | Findings—Intervention                                                | Findings—Comparison                                                 | Between Group P |
|-------------------------------------------------------------------------------------------------------------|--------------------------------------------------------------|---------------------------------------------------------------|-----------------|----------------------------------------------------------------------|---------------------------------------------------------------------|-----------------|
| Changes in appetite<br>Arnold et al <sup>15</sup>                                                           | Zinc 15 mg once daily (>8 wk with amphetamine in all groups) | Zinc 15 mg twice daily                                        | 8 wk            | Changes in appetite                                                  | Changes in appetite                                                 | NR              |
| 52<br>Fair<br>RCT                                                                                           |                                                              |                                                               | >8 wk           | No. patients with outcome = 3<br>Changes in appetite                 | No. patients with outcome = 4<br>Changes in appetite                | NR              |
| Children aged 7–17 y                                                                                        | Placebo                                                      |                                                               | 8 wk            | No. patients with outcome = 15<br>Changes in appetite                | No. patients with outcome = 8<br>Changes in appetite                | NR              |
|                                                                                                             |                                                              |                                                               | >8 wk           |                                                                      | No. patients with outcome = 4<br>Changes in appetite                | NR              |
|                                                                                                             |                                                              |                                                               |                 |                                                                      | No. patients with outcome = 17<br>Changes in appetite               | NR              |
| Gastrointestinal symptoms<br>Arnold et al <sup>15</sup>                                                     | Zinc 15 mg once daily                                        | Zinc 15 mg twice daily                                        | 8 wk            | Stomachaches and other GI problems                                   | Stomachaches and other GI problems                                  | NR              |
| 52<br>Fair<br>RCT                                                                                           |                                                              |                                                               | >8 wk           | No. patients with outcome = 11<br>Stomachaches and other GI problems | No. patients with outcome = 4<br>Stomachaches and other GI problems | NR              |
| Children aged 7–17 y<br>Tics or other movement disorders<br>Arnold et al <sup>15</sup>                      | Zinc 15 mg once daily                                        | Zinc 15 mg twice daily                                        | 8 wk            | Stereotypical behaviors                                              | Stereotypical behaviors                                             | NR              |
| 52<br>Fair<br>RCT                                                                                           |                                                              |                                                               | >8 wk           | No. patients with outcome = 3                                        | No. patients with outcome = 1                                       | NR              |
| Children aged 7–17 y<br>Sleep disturbance<br>Arnold et al <sup>15</sup>                                     | Zinc 15 mg once daily                                        | Zinc 15 mg twice daily                                        | 8 wk            | Stereotypical behaviors                                              | Stereotypical behaviors                                             | NR              |
| 52<br>Fair<br>RCT                                                                                           |                                                              |                                                               | >8 wk           | No. patients with outcome = 7                                        | No. patients with outcome = 2                                       | NR              |
| Children aged 7–17 y<br>Sleep disturbance<br>Arnold et al <sup>15</sup>                                     | Zinc 15 mg once daily                                        | Zinc 15 mg twice daily                                        | 8 wk            | Sleep                                                                | Sleep                                                               | NR              |
| 52<br>Fair<br>RCT                                                                                           |                                                              |                                                               | >8 wk           | No. patients with outcome = 0                                        | No. patients with outcome = 1                                       | NR              |
| Children aged 7–17 y<br>Nonpharmacologic versus pharmacologic<br>Behavior changes<br>Li et al <sup>46</sup> | MPH 1 mg/kg per d                                            | Ningdong granule (a traditional Chinese medicine preparation) | 8 wk            | Anxiety                                                              | Anxiety                                                             | NR              |
| 72<br>Good<br>RCT                                                                                           |                                                              |                                                               |                 | No. patients with outcome = 5                                        | No. patients with outcome = 1                                       | NR              |

TABLE 28 Continued

| Study; #; Quality <sup>a</sup> ; Design; Age Category                       | Intervention        | Comparison                                                    | Follow-up Times | Findings—Intervention                                                                 | Findings—Comparison                                                                  | Between Group P |
|-----------------------------------------------------------------------------|---------------------|---------------------------------------------------------------|-----------------|---------------------------------------------------------------------------------------|--------------------------------------------------------------------------------------|-----------------|
| Children aged 7–17 y<br>Changes in appetite<br>Li et al <sup>46</sup>       | MPH 1 mg/kg per d   | Ningdong granule (a traditional Chinese medicine preparation) | 8 wk            | Decreased appetite                                                                    | Decreased appetite                                                                   | NR              |
| 72<br>Good<br>RCT                                                           |                     |                                                               |                 | No. patients with outcome = 13<br>Increased appetite<br>No. patients with outcome = 4 | No. patients with outcome = 1<br>Increased appetite<br>No. patients with outcome = 5 | NR              |
| Children aged 7–17 y<br>Salehi et al <sup>65</sup>                          | MPH (up to 30 mg/d) | Ginkgo biloba                                                 | 6 wk            | Decreased appetite                                                                    | Decreased appetite                                                                   | P = .0002       |
| 50<br>Good<br>RCT                                                           |                     |                                                               |                 | No. patients with outcome = 5                                                         | No. patients with outcome = 19                                                       |                 |
| Children aged 7–17 y<br>Chemical leukoderma<br>Li et al <sup>46</sup>       | MPH 1 mg/kg per d   | Ningdong granule (a traditional Chinese medicine preparation) | 8 wk            | ADHD RS teacher                                                                       | ADHD RS teacher                                                                      | NS              |
| 72<br>Good<br>RCT                                                           |                     |                                                               |                 | Mean within group change = 12.3 (SD = 3.1)                                            | Mean within group change = 13.9 (SD = 2.3)                                           |                 |
| Children aged 7–17 y<br>Depression or anxiety<br>Salehi et al <sup>65</sup> | MPH (up to 30 mg/d) | Ginkgo biloba                                                 |                 | Sadness                                                                               | Sadness                                                                              | NS              |
| 50<br>Good<br>RCT                                                           |                     |                                                               |                 | No. patients with outcome = 2<br>Anxiety<br>No. patients with outcome = 7             | No. patients with outcome = 7<br>Anxiety<br>No. patients with outcome = 9            | NS              |
| Children aged 7–17 y<br>Gastrointestinal symptoms<br>Li et al <sup>46</sup> | MPH 1 mg/kg per d   | Ningdong granule (a traditional Chinese medicine preparation) | 8 wk            | Nausea                                                                                | Nausea                                                                               | NR              |
| 72<br>Good<br>RCT                                                           |                     |                                                               |                 | No. patients with outcome = 16<br>Stomach pain<br>No. patients with outcome = 12      | No. patients with outcome = 2<br>Stomach pain<br>No. patients with outcome = 2       | NR              |
| Children aged 7–17 y<br>Sleep disturbance                                   |                     |                                                               |                 |                                                                                       |                                                                                      |                 |







TABLE 28 Continued

| Study; N; Quality <sup>a</sup> ; Design; Age Category                                  | Intervention                | Comparison | Follow-up Times | Findings—Intervention                                    | Findings—Comparison                                      | Between Group P |
|----------------------------------------------------------------------------------------|-----------------------------|------------|-----------------|----------------------------------------------------------|----------------------------------------------------------|-----------------|
| Katz et al <sup>45</sup>                                                               | Patented herbal preparation | Placebo    | 0.5 mo          | Sleep disturbance                                        | Sleep disturbance                                        | NR              |
| 120<br>Fair<br>RCT                                                                     |                             |            |                 | No. patients with outcome = 1                            | No. patients with outcome = 4                            |                 |
| Children aged 7–17 y<br>Suicide ideation<br>Arnold et al <sup>15</sup>                 | Zinc 15 mg once daily       | Placebo    | 8 wk            | Harm to self or others                                   | Harm to self or others                                   | NR              |
| 52<br>Fair<br>RCT                                                                      |                             |            |                 | No. patients with outcome = 1                            | No. patients with outcome = 0                            |                 |
| Children aged 7–17 y<br>Tics or other movement disorders<br>Arnold et al <sup>15</sup> | Zinc 15 mg once daily       | Placebo    | >8 wk           | Harm to self or others<br>No. patients with outcome = 1  | Harm to self or others<br>No. patients with outcome = 0  | NR              |
| 52<br>Fair<br>RCT                                                                      |                             |            |                 | Stereotypical behaviors                                  | Stereotypical behaviors                                  | NR              |
| Children aged 7–17 y                                                                   |                             |            |                 | No. patients with outcome = 3                            | No. patients with outcome = 5                            |                 |
|                                                                                        |                             |            |                 | Stereotypical behaviors<br>No. patients with outcome = 7 | Stereotypical behaviors<br>No. patients with outcome = 9 | NR              |

GI, gastrointestinal; IU, international unit; MPH, methylphenidate; NR, not recorded; NS, not significant; WPREMB, Weekly Parent Ratings of Evening and Morning Behavior.

<sup>a</sup> See Supplemental Table 17 for the definition of quality assessment ratings.

**SUPPLEMENTAL TABLE 29** Changes in Standardized Scores on Other Treatment Approaches for ADHD

| Study (Companion); <i>M</i> ; Quality <sup>a</sup> ; Design;<br>Age Category                                                                                                                   | Intervention            | Comparison       | Follow-up Times | Findings—Intervention                                                                        | Findings—Comparison                                                                  | Between Group <i>P</i> |
|------------------------------------------------------------------------------------------------------------------------------------------------------------------------------------------------|-------------------------|------------------|-----------------|----------------------------------------------------------------------------------------------|--------------------------------------------------------------------------------------|------------------------|
| Nonpharmacologic versus<br>nonpharmacologic (NA)<br>Nonpharmacologic versus<br>pharmacologic (NA)<br>Nonpharmacologic versus placebo,<br>usual care, or waitlist<br>Hong and Cho <sup>40</sup> | Acupuncture             | Waitlist control | 1.5 mo          | ADHD RS (Korean version) total score<br>Mean = -4.91 (SD 10.50)                              | ADHD RS (Korean version) total score<br>Mean = -4.00 (SD 11.00)                      | <i>P</i> = .561        |
| Fair<br>RCT                                                                                                                                                                                    |                         |                  |                 | ADHD RS inattention<br>Mean within group change = -2.67<br>(SD 4.90)                         | ADHD RS inattention<br>Mean within group change = -1.68 (SD 4.61)                    | <i>P</i> = .250        |
| Children aged 7–17 y                                                                                                                                                                           |                         |                  |                 | ADHD RS hyperactivity and/or<br>impulsivity<br>Mean within group change = -2.26<br>(SD 5.50) | ADHD RS hyperactivity and/or impulsivity<br>Mean w/in group change = -2.84 (SD 4.00) | <i>P</i> = .956        |
|                                                                                                                                                                                                |                         |                  |                 | Conners' RS<br>Mean within group change = -2.51<br>(SD 4.95)                                 | Conners' RS<br>Mean within group change = -1.78 (SD 4.14)                            | <i>P</i> = .385        |
|                                                                                                                                                                                                |                         |                  |                 | CBCL total score<br>Mean within group change = -7.79<br>(SD 16.69)                           | CBCL total score<br>Mean within group change = -3.00 (SD<br>25.00)                   | <i>P</i> = .393        |
|                                                                                                                                                                                                |                         |                  |                 | CBCL ADHD subscale<br>Mean within group change = -1.38<br>(SD 3.54)                          | CBCL ADHD subscale<br>Mean within group change = -0.64 (SD 4.36)                     | <i>P</i> = .247        |
|                                                                                                                                                                                                |                         |                  |                 | CBCL external subscale<br>Mean within group change = -1.85<br>(SD 7.19)                      | CBCL external subscale<br>Mean within group change = -1.00 (SD<br>10.00)             | <i>P</i> = .632        |
| Mohammadi et al <sup>53</sup> (Mostafavi et<br>al <sup>56</sup> )                                                                                                                              | MPH and<br>melatonin    | MPH and placebo  | 8 wk            | ADHD RS attention score<br>Mean = 11.11                                                      | ADHD RS attention score<br>Mean = 11.29                                              | <i>P</i> = .974        |
| Fair<br>RCT                                                                                                                                                                                    |                         |                  |                 | ADHD RS hyperactivity score<br>Mean = 11.62                                                  | ADHD RS hyperactivity score<br>Mean = 10.96                                          | <i>P</i> = .720        |
| Children aged 7–17 y<br>Webster-Stratton et al <sup>16</sup>                                                                                                                                   | Incredible y<br>program | Waitlist         | 5 mo            | CBCL: mother attention problems<br>Mean = 65.8 (SD = 7)                                      | CBCL: mother attention problems<br>Mean = 68.8 (SD = 9.6)                            | NS                     |
| Fair<br>RCT                                                                                                                                                                                    |                         |                  |                 | CBCL: father attention problems<br>Mean = 64.8 (SD = 8.6)                                    | CBCL: father attention problems<br>Mean = 65.8 (SD = 10)                             | NS                     |
| Children of all ages ≤ 17 y                                                                                                                                                                    |                         |                  |                 |                                                                                              |                                                                                      |                        |

MPH, methylphenidate; NA, not applicable; NS, not significant.

<sup>a</sup> See "Quality Assessment and Applicability of Individual Studies" for definitions of quality assessment ratings.

**SUPPLEMENTAL TABLE 30** Findings on Other Approaches for ADHD

| Study (Companion); <i>N</i> ; Quality <sup>a</sup> ; Design; Age Category               | Intervention                                       | Comparison                                           | Follow-up Times | Findings—Intervention                                                                    | Findings—Comparison                                                                      | Between Group <i>P</i> |
|-----------------------------------------------------------------------------------------|----------------------------------------------------|------------------------------------------------------|-----------------|------------------------------------------------------------------------------------------|------------------------------------------------------------------------------------------|------------------------|
| Nonpharmacologic versus nonpharmacologic Academic performance Evans et al <sup>50</sup> | Challenging horizons program: after school version | Challenging horizons program: mentoring version      | 12 mo           | GPA                                                                                      | GPA                                                                                      | <i>P</i> = .146        |
| 326<br>Fair<br>RCT<br>Children aged 7–17 y                                              |                                                    | Community care                                       |                 | Mean = 2.3                                                                               | Mean = 2.1                                                                               |                        |
| Mautone et al <sup>49</sup>                                                             | Family-school success: early elementary            | Coping with ADHD through relationships and education | 12 wk           | ACES score                                                                               | ACES score                                                                               | NR                     |
| 61<br>Fair<br>RCT<br>Children of all ages ≤17 y                                         |                                                    |                                                      |                 | Mean = 3.38 (SD = 0.57)                                                                  | Mean = 3.11 (SD = 0.5)                                                                   |                        |
| Power et al <sup>63</sup>                                                               | Family school success therapy                      | Coping with ADHD through relationships and education | 2 mo post-12 wk | ACES score                                                                               | ACES score                                                                               | NR                     |
| 199<br>Fair<br>RCT<br>Children aged 7–17 y                                              |                                                    |                                                      |                 | Mean = 3.39 (SD = 0.48)                                                                  | Mean = 3.25 (SD = 0.66)                                                                  |                        |
| Behavior changes Abikoff et al <sup>13</sup>                                            | New forest parenting package                       | Helping the noncompliant child                       | 3 mo            | Academic performance RS                                                                  | Academic performance RS                                                                  | NS                     |
| 164<br>Good<br>RCT<br>Children aged ≤6 y                                                |                                                    |                                                      |                 | Mean = 3.32 (SD = 0.65)                                                                  | Mean = 3.2 (SD = 0.68)                                                                   |                        |
|                                                                                         |                                                    |                                                      | 6 mo            | Mean = 3.51 (SD = 0.64)                                                                  | Mean = 3.36 (SD = 0.76)                                                                  | NS                     |
|                                                                                         |                                                    |                                                      | 6.8 mo          | Behavior changes: CPRS, revised: total<br>Mean = 68.01 (SD = 11.69)                      | Behavior changes: CPRS, revised: total<br>Mean = 63.44 (SD = 10.13)                      | NS                     |
|                                                                                         |                                                    |                                                      |                 | Behavior changes: CPRS, revised: inattention<br>Mean = 65.60 (SD 13.53)                  | Behavior changes: CPRS, revised: inattention<br>Mean = 61.74 (SD 10.04)                  | NS                     |
|                                                                                         |                                                    |                                                      |                 | Behavior changes: CPRS, revised: hyperactivity<br>Mean = 68.08 (SD 10.69)                | Behavior changes: CPRS, revised: hyperactivity<br>Mean = 63.39 (SD 10.24)                | NS                     |
|                                                                                         |                                                    |                                                      |                 | Behavior changes: Conners' teacher RS, revised: total<br>Mean = 64.27 (SD = 12.27)       | Behavior changes: Conners' teachers RS, revised: total<br>Mean = 62.06 (SD = 11.39)      | NS                     |
|                                                                                         |                                                    |                                                      |                 | Behavior changes: Conners' teacher RS, revised: inattention<br>Mean = 61.39 (SD = 13.58) | Behavior changes: Conners' teacher RS, revised: inattention<br>Mean = 60.48 (SD = 11.79) | NS                     |

TABLE 30 Continued

| Study (Companion); <i>N</i> ; Quality <sup>a</sup> , Design; Age Category | Intervention | Comparison             | Follow-up Times | Findings—Intervention                                                                                                                                                  | Findings—Comparison                                                                        | Between Group <i>P</i>            |
|---------------------------------------------------------------------------|--------------|------------------------|-----------------|------------------------------------------------------------------------------------------------------------------------------------------------------------------------|--------------------------------------------------------------------------------------------|-----------------------------------|
| Myers et al <sup>57</sup>                                                 | Telemedicine | Usual care and consult | 25 wk           | Behavior changes: Conners' teacher RS, revised: hyperactivity<br>Mean = 64.25 (SD = 11.64)<br>Behavior changes: Vanderbilt caregiver, meeting criteria for inattention | Behavior changes: Conners' teacher RS, revised: hyperactivity<br>Mean = 62.01 (SD = 12.06) | NS<br><i>P</i> < .001             |
| 223<br>Fair                                                               |              |                        |                 | Behavior changes: Vanderbilt caregiver, meeting criteria for hyperactivity                                                                                             |                                                                                            | <i>P</i> = .02                    |
| RCT<br>Children of all ages<br>≤17 y                                      |              |                        |                 | Behavior changes: Vanderbilt caregiver, meeting criteria for combined                                                                                                  |                                                                                            | <i>P</i> = .005                   |
|                                                                           |              |                        |                 | Behavior changes: Vanderbilt teacher, meeting criteria for inattention                                                                                                 |                                                                                            | NS                                |
|                                                                           |              |                        |                 | Behavior changes: Vanderbilt teacher, meeting criteria for hyperactivity                                                                                               |                                                                                            | NS                                |
|                                                                           |              |                        |                 | Behavior changes: Vanderbilt teacher, meeting criteria for combined                                                                                                    |                                                                                            | <i>P</i> = .02<br><i>P</i> = .045 |
| Oberai et al <sup>58</sup><br>61<br>Fair<br>RCT                           | Homeopathy   | Placebo                | 6 wk            | CPRS, revised: oppositional<br>Mean = 56.4 (SD = 7)                                                                                                                    | CPRS, revised: oppositional<br>Mean = 63.2 (SD = 8.3)                                      | NR                                |
|                                                                           |              |                        |                 | CPRS, revised: cognition problems                                                                                                                                      | CPRS, revised: cognition problems                                                          | NR                                |
|                                                                           |              |                        |                 | Mean = 56.6 (SD = 7.4)                                                                                                                                                 | Mean = 67.4 (SD = 5.4)                                                                     | NR                                |
|                                                                           |              |                        |                 | CPRS, revised: hyperactivity<br>Mean = 63.7 (SD = 9.8)                                                                                                                 | CPRS, revised: hyperactivity<br>Mean = 78.3 (SD = 7.9)                                     | NR                                |
|                                                                           |              |                        |                 | CPRS, revised: ADHD index<br>Mean = 58.2 (SD = 7.3)                                                                                                                    | CPRS, revised: ADHD index<br>Mean = 68.3 (SD = 4.6)                                        | NR                                |
|                                                                           |              |                        | 12 wk           | CPRS, revised: oppositional<br>Mean = 49.5 (9.5)                                                                                                                       | CPRS, revised: oppositional<br>Mean = 66.2 (7.6)                                           | <i>P</i> = .0001                  |
|                                                                           |              |                        |                 | CPRS, revised: cognition problems<br>Mean = 50.7 (7.7)                                                                                                                 | CPRS, revised: cognition problems<br>Mean = 66.6 (6.2)                                     | <i>P</i> = .0001                  |
|                                                                           |              |                        |                 | CPRS, revised: hyperactivity<br>Mean = 55.6 (11.9)                                                                                                                     | CPRS, revised: hyperactivity<br>Mean = 78.2 (6.9)                                          | <i>P</i> = .0001                  |
|                                                                           |              |                        |                 | CPRS, revised: ADHD index<br>Mean = 51.8 (9.1)                                                                                                                         | CPRS, revised: ADHD index<br>Mean = 68.4 (5)                                               | <i>P</i> = .0001                  |

**TABLE 30** Continued

| Study (Companion); <i>N</i><br>Quality <sup>a</sup> ; Design; Age Category                                                        | Intervention                                             | Comparison                                         | Follow-up Times       | Findings—Intervention                                                                                                   | Findings—Comparison                                                                                                                                                                                                                                        | Between Group <i>P</i> |
|-----------------------------------------------------------------------------------------------------------------------------------|----------------------------------------------------------|----------------------------------------------------|-----------------------|-------------------------------------------------------------------------------------------------------------------------|------------------------------------------------------------------------------------------------------------------------------------------------------------------------------------------------------------------------------------------------------------|------------------------|
| Functional impairment<br>Evans et al <sup>50</sup>                                                                                | Challenging horizons<br>program: after school<br>version | Challenging horizons program:<br>mentoring version | 6 mo<br>posttreatment | CPRS, revised<br>Effect size = 0.22<br>Impairment RS: parent report;<br>relation to children<br>Mean = 1.76 (SD = 1.89) | Impairment RS: parent<br>report; relation to<br>children<br>Mean = 1.67 (SD = 1.78)                                                                                                                                                                        | <i>P</i> = .005<br>NR  |
| 326<br>Fair<br>RCT<br>Children aged 7–17 y                                                                                        | Community care                                           |                                                    |                       | Impairment RS: teacher report;<br>relation with peers<br>Mean = 1.93 (SD = 1.91)                                        | Impairment RS: teacher<br>report; relation with peers<br>Mean = 1.97 (SD = 1.83)<br>Impairment RS: parent<br>report; relation to<br>children<br>Mean = 1.8 (SD = 1.69)<br>Impairment RS: teacher<br>report; relation with peers<br>Mean = 1.72 (SD = 1.94) | NS<br>NS               |
| Nonpharmacologic versus<br>pharmacologic<br>Behavior changes<br>Mohammadi et al <sup>55</sup><br>(Mostafavi et al <sup>56</sup> ) | MPH and melatonin                                        | MPH and placebo                                    | 8 wk                  | Irritability<br>No. patients with outcome = 16                                                                          | Irritability<br>No. patients with outcome = 10                                                                                                                                                                                                             | NR                     |
| 60<br>Fair<br>RCT<br>Children aged 7–17 y                                                                                         |                                                          |                                                    |                       | Sadness<br>No. patients with outcome = 10                                                                               | Sadness<br>No. patients with outcome = 2                                                                                                                                                                                                                   | NR                     |
| Changes in appetite<br>Mohammadi et al <sup>55</sup><br>(Mostafavi et al <sup>56</sup> )                                          | MPH and melatonin                                        | MPH and placebo                                    | 8 wk                  | Appetite score<br>Mean = 13.26                                                                                          | Appetite score<br>Mean = 12.33                                                                                                                                                                                                                             | <i>P</i> = .755        |
| 60<br>Fair<br>RCT<br>Children aged 7–17 y                                                                                         |                                                          |                                                    |                       | Loss of appetite<br>No. patients with outcome = 14                                                                      | Loss of appetite<br>No. patients with outcome = 11                                                                                                                                                                                                         |                        |
| Gastrointestinal symptoms<br>Mohammadi et al <sup>55</sup><br>(Mostafavi et al <sup>56</sup> )                                    | MPH and melatonin                                        | MPH and placebo                                    | 8 wk                  | Stomachache<br>No. patients with outcome = 9                                                                            | Stomachache<br>No. patients with outcome = 5                                                                                                                                                                                                               | NR                     |
| 60                                                                                                                                |                                                          |                                                    |                       |                                                                                                                         |                                                                                                                                                                                                                                                            |                        |

TABLE 30 Continued

| Study (Companion); <i>N</i> ; Quality <sup>a</sup> , Design; Age Category                                                           | Intervention                 | Comparison      | Follow-up Times | Findings—Intervention                                                        | Findings—Comparison                                                          | Between Group <i>P</i> |
|-------------------------------------------------------------------------------------------------------------------------------------|------------------------------|-----------------|-----------------|------------------------------------------------------------------------------|------------------------------------------------------------------------------|------------------------|
| Fair<br>RCT                                                                                                                         |                              |                 |                 | Nausea and vomiting<br>No. patients with outcome = 3                         | Nausea and vomiting<br>No. patients with outcome = 3                         | NR                     |
| Children aged 7–17 y<br>Sleep disturbance<br>Mohammadi et al <sup>55</sup><br>(Mostafavi et al <sup>56</sup> )                      | MPH and melatonin            | MPH and placebo | 8 wk            | Mean sleep latency (min)<br>Mean = 17.96                                     | Mean sleep latency (min)<br>Mean = 26.37                                     | <i>P</i> = .267        |
| 60<br>Fair<br>RCT                                                                                                                   |                              |                 |                 | Total sleep (h)<br>Mean = 8.51                                               | Total sleep (h)<br>Mean = 8.27                                               | <i>P</i> = .197        |
| Children aged 7–17 y                                                                                                                |                              |                 |                 | SDSC sleep score<br>Mean = 41.3<br>Insomnia<br>No. patients with outcome = 8 | SDSC sleep score<br>Mean = 45.5<br>Insomnia<br>No. patients with outcome = 8 | <i>P</i> = .528        |
|                                                                                                                                     |                              |                 |                 | Sleepiness<br>No. patients with outcome = 4                                  | Sleepiness<br>No. patients with outcome = 4                                  | NR                     |
| Tics or other movement disorders<br>Mohammadi et al <sup>55</sup><br>(Mostafavi et al <sup>56</sup> )                               | MPH and melatonin            | MPH and placebo | 8 wk            | Dyskinesias<br>No. patients with outcome = 0                                 | Dyskinesias<br>No. patients with outcome = 2                                 | NR                     |
| 60<br>Fair<br>RCT                                                                                                                   |                              |                 |                 | Tics<br>No. patients with outcome = 1                                        | Tics<br>No. patients with outcome = 1                                        | NR                     |
| Children aged 7–17 y<br>Wt decrease<br>Mohammadi et al <sup>55</sup><br>(Mostafavi et al <sup>56</sup> )                            | MPH and melatonin            | MPH and placebo | 8 wk            | Wt loss<br>No. patients with outcome = 9                                     | Wt loss<br>No. patients with outcome = 9                                     | NR                     |
| 60<br>Fair<br>RCT                                                                                                                   |                              |                 |                 |                                                                              |                                                                              |                        |
| Children aged 7–17 y<br>Nonpharmacologic versus placebo, usual care, or waitlist<br>Behavior changes<br>Abikoff et al <sup>13</sup> | New forest parenting package | Control         | 6.8 mo          | Behavior changes: CPRS, revised: total                                       | Behavior changes: CPRS, revised: total                                       | <i>P</i> = .001        |



**TABLE 30** Continued

| Study (Companion); <i>N</i><br>Quality <sup>a</sup> ; Design; Age Category                                                                                                  | Intervention | Comparison       | Follow-up Times | Findings—Intervention                                                                                                                                                             | Findings—Comparison                                                                                                                                                              | Between Group <i>P</i>                     |
|-----------------------------------------------------------------------------------------------------------------------------------------------------------------------------|--------------|------------------|-----------------|-----------------------------------------------------------------------------------------------------------------------------------------------------------------------------------|----------------------------------------------------------------------------------------------------------------------------------------------------------------------------------|--------------------------------------------|
| 164<br>Good<br>RCT<br>Children aged ≤6 y                                                                                                                                    |              |                  |                 | Mean = 68.01 (SD = 11.69)<br>Behavior changes: CPRS, revised: inattention<br>Mean = 65.60 (SD 13.53)<br>Behavior changes: CPRS, revised: hyperactivity<br>Mean = 68.08 (SD 10.69) | Mean = 76.44 (SD = 9.84)<br>Behavior changes: CPRS, revised: inattention<br>Mean = 75.31 (SD 10.38)<br>Behavior changes: CPRS, revised: hyperactivity<br>Mean = 74.45 (SD 10.67) | <i>P</i> = .001<br><br><br><i>P</i> = .001 |
|                                                                                                                                                                             |              |                  |                 | Behavior changes: Conners' teachers RS, revised: total<br>Mean = 64.27 (SD = 12.27)<br>Behavior changes: Conners' teacher RS, revised: inattention<br>Mean = 61.39 (SD = 13.58)   | Behavior changes: Conners' teacher RS, revised: total<br>Mean = 70.65 (SD = 11.22)<br>Behavior changes: CPRS, revised: inattention<br>Mean = 68.22 (SD = 11.81)                  | NS<br><br>NS                               |
|                                                                                                                                                                             |              |                  |                 | Behavior changes: Conners' teacher RS, revised: hyperactivity<br>Mean = 64.25 (SD = 11.64)                                                                                        | Behavior changes: CPRS, revised: hyperactivity<br>Mean = 70.26 (SD = 11.98)                                                                                                      | NS                                         |
| Functional impairment<br>Hong and Cho <sup>40</sup><br>48<br>Fair<br>RCT<br>Children aged 7–17 y<br>Oberai et al <sup>58</sup><br>61<br>Fair<br>RCT<br>Children aged 7–17 y | Acupuncture  | Waitlist control | 1.5 mo          | CGI-S<br>Mean within group change = -0.83 (SD 1.00)                                                                                                                               | CGI-S<br>Mean within group change = 0.00 (SD 1.00)                                                                                                                               | .012                                       |
|                                                                                                                                                                             | Homeopathy   | Placebo          | 6 wk            | CGI-SS<br>Mean = 2.9 (SD = 0.7)                                                                                                                                                   | CGI-SS<br>Mean = 3.8 (SD = 0.6)                                                                                                                                                  | NR                                         |
|                                                                                                                                                                             |              |                  | 12 wk           | CGI-S scale<br>Mean = 2.5 (0.7)                                                                                                                                                   | CGI-S scale<br>Mean = 4 (0.6)                                                                                                                                                    | <i>P</i> = .0001                           |

ACES: Academic Competence Evaluation Scale; CGI-SS: Clinical Global Impression of Severity of Suicidality; GPA, grade point average; MPH, methylphenidate; NR, not recorded; NS, not significant; SDSC, Sleep Disturbance Scale for Children.  
<sup>a</sup> See Supplemental Table 17 for the definition of quality assessment ratings.

**SUPPLEMENTAL TABLE 31 Adverse Effects**

| Adverse Effect                                         | Findings                                                                                                                                                                                                                                                                                                                                                             |
|--------------------------------------------------------|----------------------------------------------------------------------------------------------------------------------------------------------------------------------------------------------------------------------------------------------------------------------------------------------------------------------------------------------------------------------|
| <b>Physical</b>                                        |                                                                                                                                                                                                                                                                                                                                                                      |
| Wt loss <sup>65</sup>                                  | 12.0% ( <i>n</i> = 3) receiving ginkgo biloba and 32.0% ( <i>n</i> = 8) receiving MPH                                                                                                                                                                                                                                                                                |
| Biting fingernails <sup>47</sup>                       | 39.8% ( <i>n</i> = 4.6) receiving PS omega-3                                                                                                                                                                                                                                                                                                                         |
| Crying <sup>47</sup>                                   | 57.1% ( <i>n</i> = 3.3) receiving PS omega-3                                                                                                                                                                                                                                                                                                                         |
| Talk less <sup>47</sup>                                | 45.4% ( <i>n</i> = 2.6) receiving PS omega-3                                                                                                                                                                                                                                                                                                                         |
| Tics <sup>47</sup>                                     | 36.6% ( <i>n</i> = 2.4) receiving PS omega-3                                                                                                                                                                                                                                                                                                                         |
| Sedation <sup>45</sup>                                 | <i>n</i> = 1 receiving compound herbal supplement                                                                                                                                                                                                                                                                                                                    |
| Accidental injury <sup>45</sup>                        | <i>n</i> = 1 receiving compound herbal supplement                                                                                                                                                                                                                                                                                                                    |
| Central nervous symptom unspecified <sup>15</sup>      | <i>N</i> = 1 zinc groups and <i>n</i> = 0 placebo                                                                                                                                                                                                                                                                                                                    |
| Fever <sup>15</sup>                                    | <i>N</i> = 3 zinc groups and <i>n</i> = 0 placebo group                                                                                                                                                                                                                                                                                                              |
| Head, eyes, ears, and throat unspecified <sup>15</sup> | <i>N</i> = 4 zinc groups and <i>n</i> = 3 placebo group                                                                                                                                                                                                                                                                                                              |
| Musculoskeletal, unspecified <sup>15</sup>             | <i>N</i> = 1 zinc groups and <i>n</i> = 4 placebo group                                                                                                                                                                                                                                                                                                              |
| Respiratory, unspecified <sup>15</sup>                 | <i>N</i> = 8 zinc groups and <i>n</i> = 5 placebo group                                                                                                                                                                                                                                                                                                              |
| Slapped in face <sup>15</sup>                          | <i>N</i> = 0 zinc groups and <i>n</i> = 1 placebo                                                                                                                                                                                                                                                                                                                    |
| School performance <sup>15</sup>                       | <i>N</i> = 1 zinc groups and <i>n</i> = 0 placebo                                                                                                                                                                                                                                                                                                                    |
| Skin, unspecified <sup>15</sup>                        | <i>N</i> = 2 zinc groups and <i>n</i> = 3 placebo                                                                                                                                                                                                                                                                                                                    |
| Upper respiratory infection <sup>15</sup>              | <i>N</i> = 2 zinc groups and <i>n</i> = 4 placebo                                                                                                                                                                                                                                                                                                                    |
| <b>Gastrointestinal</b>                                |                                                                                                                                                                                                                                                                                                                                                                      |
| Nausea <sup>17,45,46</sup>                             | 5.6% ( <i>n</i> = 2) receiving NDG and 44.4% ( <i>n</i> = 16) receiving MPH<br>20% ( <i>n</i> = 6) receiving MPH alone<br><i>n</i> = 2 receiving compound herbal supplement                                                                                                                                                                                          |
| Dyspepsia <sup>17</sup>                                | 40% ( <i>n</i> = 9) receiving omega-3/6 alone after 1 mo of treatment                                                                                                                                                                                                                                                                                                |
| Stomach pain <sup>15,46,47,65</sup>                    | 5.6% ( <i>n</i> = 2) receiving NDG and 33.3% ( <i>n</i> = 12) receiving MPH<br>12.0% ( <i>n</i> = 3) receiving ginkgo biloba and 20.0% ( <i>n</i> = 5) receiving MPH<br>15.3% ( <i>n</i> = 1.8) receiving PS omega-3<br><i>N</i> = 9 zinc groups and <i>n</i> = 13 placebo<br><i>n</i> = 3 receiving PS omega-3<br><i>n</i> = 2 receiving compound herbal supplement |
| Discomfort <sup>45,48</sup>                            |                                                                                                                                                                                                                                                                                                                                                                      |
| <b>Sleep</b>                                           |                                                                                                                                                                                                                                                                                                                                                                      |
| Insomnia <sup>17,47,65</sup>                           | 20% ( <i>n</i> = 6) receiving MPH alone<br>12.0% ( <i>n</i> = 3) receiving ginkgo biloba and 48.0% ( <i>n</i> = 12) receiving MPH                                                                                                                                                                                                                                    |
| Hypersomnia <sup>46</sup>                              | 46.9% ( <i>n</i> = 2.9) receiving PS omega-3<br>16.7% ( <i>n</i> = 5) receiving NDG and 0 receiving MPH                                                                                                                                                                                                                                                              |
| Trouble falling asleep <sup>46</sup>                   | 2.8% ( <i>n</i> = 1) receiving NDG and 13.9% ( <i>n</i> = 5) receiving MPH                                                                                                                                                                                                                                                                                           |
| Nightmares <sup>47</sup>                               | 28.6% ( <i>n</i> = 2.9) receiving PS omega-3                                                                                                                                                                                                                                                                                                                         |
| Disturbance <sup>15,45</sup>                           | <i>n</i> = 1 receiving compound herbal supplement<br><i>N</i> = 1 zinc groups and <i>n</i> = 4 placebo group                                                                                                                                                                                                                                                         |
| <b>Appetite</b>                                        |                                                                                                                                                                                                                                                                                                                                                                      |
| Suppression <sup>17</sup>                              | 70% ( <i>n</i> = 21) receiving MPH alone, 6.7% ( <i>n</i> = 2) receiving omega-3/6 alone, and 33.3% ( <i>n</i> = 10) receiving combined                                                                                                                                                                                                                              |
| Decreased <sup>45-47,65</sup>                          | 2.8% ( <i>n</i> = 1) receiving NDG and 36.1% ( <i>n</i> = 13) receiving MPH<br>20.0% ( <i>n</i> = 5) receiving ginkgo biloba and 76.0% ( <i>n</i> = 19) receiving MPH<br>39.8% ( <i>n</i> = 3.1) receiving PS omega-3<br><i>n</i> = 1 receiving compound herbal supplement                                                                                           |
| Increased <sup>46</sup>                                | 13.9% ( <i>n</i> = 5) receiving NDG and 11.1% ( <i>n</i> = 4) receiving MPH                                                                                                                                                                                                                                                                                          |
| Appetite change unspecified <sup>15</sup>              | <i>N</i> = 7 zinc groups and <i>n</i> = 4 placebo                                                                                                                                                                                                                                                                                                                    |
| <b>Symptom</b>                                         |                                                                                                                                                                                                                                                                                                                                                                      |
| Headache <sup>15,47,48</sup>                           | <i>n</i> = 1 receiving PS omega-3<br>33.7% ( <i>n</i> = 2.6) receiving PS omega-3<br><i>N</i> = 7 zinc group and <i>n</i> = 13 placebo                                                                                                                                                                                                                               |
| Daydream <sup>47</sup>                                 | 57.1% ( <i>n</i> = 2.4) receiving PS omega-3                                                                                                                                                                                                                                                                                                                         |
| Dizziness <sup>47</sup>                                | 16.3% ( <i>n</i> = 2.6) receiving PS omega-3                                                                                                                                                                                                                                                                                                                         |
| Drowsiness <sup>47</sup>                               | 30.6% ( <i>n</i> = 1.9) receiving PS omega-3                                                                                                                                                                                                                                                                                                                         |
| Euphoric <sup>47</sup>                                 | 38.8% ( <i>n</i> = 3.0) receiving PS omega-3                                                                                                                                                                                                                                                                                                                         |
| Anxious <sup>15,47</sup>                               | 49.0% ( <i>n</i> = 2.7) receiving PS omega-3<br><i>N</i> = 8 zinc groups and <i>n</i> = 6 placebo group                                                                                                                                                                                                                                                              |

**TABLE 31** Continued

| Adverse Effect                          | Findings                                                                                                  |
|-----------------------------------------|-----------------------------------------------------------------------------------------------------------|
| Irritable <sup>15,47</sup>              | 72.5% ( <i>n</i> = 3.8) receiving PS omega-3<br><i>N</i> = 14 zinc groups and <i>n</i> = 10 placebo group |
| Sad, unhappy <sup>47</sup>              | 39.8% ( <i>n</i> = 2.4) receiving PS omega-3                                                              |
| Uninterested <sup>47</sup>              | 27.8% ( <i>n</i> = 3.0) receiving PS omega-3                                                              |
| Emotional lability <sup>45</sup>        | <i>n</i> = 2 receiving compound herbal supplement                                                         |
| Affective blunting <sup>15</sup>        | <i>n</i> = 1 zinc groups and <i>n</i> = 1 placebo                                                         |
| Depression <sup>15</sup>                | <i>N</i> = 9 zinc groups and <i>n</i> = 5 placebo group                                                   |
| Fatigue <sup>15</sup>                   | <i>N</i> = 4 zinc groups and <i>n</i> = 6 placebo group                                                   |
| Harm to self and others <sup>15</sup>   | <i>N</i> = 1 zinc groups and <i>n</i> = 0 placebo group                                                   |
| Hypersensitivity reaction <sup>15</sup> | <i>N</i> = 3 zinc groups and <i>n</i> = 1 placebo group                                                   |
| Stereotypical behavior <sup>15</sup>    | <i>N</i> = 4 zinc groups and <i>n</i> = 5 placebo                                                         |

MPH, methylphenidate; NDG, Ningdong granule; PS, phosphatidylserine.

| Outcome SOE Grade                                                                         | No. Studies and Design (N Patients) | Study Limitations | Directness | Consistency  | Precision | Reporting Bias | Findings                                                                                                                                                                                                                                                                                                                                                                                                                                                                                                                                                                                                                                                                                                                                                                                                                                       |
|-------------------------------------------------------------------------------------------|-------------------------------------|-------------------|------------|--------------|-----------|----------------|------------------------------------------------------------------------------------------------------------------------------------------------------------------------------------------------------------------------------------------------------------------------------------------------------------------------------------------------------------------------------------------------------------------------------------------------------------------------------------------------------------------------------------------------------------------------------------------------------------------------------------------------------------------------------------------------------------------------------------------------------------------------------------------------------------------------------------------------|
| Pharmacologic versus nonpharmacologic Changes in standardized symptom scores Insufficient | 5 RCTs (356)                        | Medium            | Direct     | Inconsistent | Imprecise | Unclear        | Five RCTs contained reports of changes in symptom scores. <sup>17,25,26,46,55,65</sup> One study contains a report of a significant change in standardized symptom scores favoring MPH medication compared with supplementation of ginkgo biloba. In 2 studies, no significant differences between groups supplemented by omega-3/6 alone or in combination with MPH medication or Ningdong granule and MPH medication was identified by standardized symptom scores. In 2 studies, no significant differences were found between MPH medication and either neurofeedback or behavioral therapy groups on changes in standardized symptom scores.                                                                                                                                                                                              |
| Neurofeedback Changes in standardized symptom scores Insufficient                         | 4 RCTs (353)                        | Low               | Direct     | Inconsistent | Imprecise | Unclear        | Four RCTs contained reports of changes in symptom scores. <sup>19,34,55,68,69</sup> In 3 of the 4 studies, researchers demonstrated improvement in standardized symptom scores compared with an inactive control, a behavioral intervention, and standard pharmacologic treatment. One study revealed no difference relative to cognitive training, and 1 study revealed no difference compared with usual care.                                                                                                                                                                                                                                                                                                                                                                                                                               |
| Cognitive training Changes in standardized symptom scores Low                             | 9 RCTs (768)                        | Medium            | Direct     | Inconsistent | Imprecise | None           | Nine RCTs contained reports of changes in symptom scores. <sup>18,23,24,28,34,35,41,68,69,71,72,75</sup> Two fair-quality RCTs (out of a total of 5) in which the Cogmed cognitive training program was evaluated contained demonstrations of a significant improvement in standardized scale scores at some, but not all, of the follow-up assessment times. A good-quality RCT revealed no treatment effect associated with the Braingame program compared with no intervention, and 2 good-quality RCTs in which computer-based cognitive training programs were compared to neurofeedback revealed either no treatment effect or superiority of neurofeedback relative to cognitive training. In 1 fair-quality RCT, researchers demonstrated a reduction in ADHD symptoms associated with cognitive training relative to no intervention. |
| CBT Changes in standardized symptom scores Low                                            | 2 RCTs (278)                        | Low               | Direct     | Consistent   | Imprecise | Suspect        | A good-quality and a fair-quality RCT revealed statistically significant improvement in ADHD symptom associated with CBT relative to usual care or a limited CBT intervention. <sup>20,21,73</sup>                                                                                                                                                                                                                                                                                                                                                                                                                                                                                                                                                                                                                                             |
| Child or parent training or behavior Changes in standardized symptom scores Moderate      | 8 RCTs (1042)                       | Low               | Direct     | Consistent   | Imprecise | None           | Of 6 good-quality and 2 fair-quality RCTs, <sup>16,22,29,32,39,42,59,60,62</sup> only 1 fair-quality study did not demonstrate a significant improvement in ADHD symptoms associated with child or parent training or sleep hygiene.                                                                                                                                                                                                                                                                                                                                                                                                                                                                                                                                                                                                           |
| Omega-3/6 fatty acid supplementation                                                      |                                     |                   |            |              |           |                |                                                                                                                                                                                                                                                                                                                                                                                                                                                                                                                                                                                                                                                                                                                                                                                                                                                |

TABLE 32 Continued

| Outcome SOE Grade                               | No. Studies and Design (N Patients) | Study Limitations | Directness | Consistency  | Precision | Reporting Bias | Findings                                                                                                                                                                                                                                                                                                                                                                                                                                  |
|-------------------------------------------------|-------------------------------------|-------------------|------------|--------------|-----------|----------------|-------------------------------------------------------------------------------------------------------------------------------------------------------------------------------------------------------------------------------------------------------------------------------------------------------------------------------------------------------------------------------------------------------------------------------------------|
| Changes in standardized symptom scores Moderate | 8 RCTs (880)                        | Low               | Direct     | Consistent   | Precise   | None           | Two meta-analyses of 4 and 3 good-quality studies, respectively, revealed no significant differences between omega-3/6 and placebo for parent ratings ( $n = 411$ , SMD $-0.32$ , 95% CI $-0.80$ to $0.15$ , $I^2 = 52.4\%$ , $Q = 6.3$ , $P = .098$ ) or teacher ratings of total ADHD symptoms ( $n = 287$ ; SMD $-0.08$ ; 95% CI $-0.47$ to $0.32$ ; $I^2 = 0.0\%$ ; $Q = 1.2$ ; $P = .56$ ). <sup>36,38,43,44,47,48,50,51,64,77</sup> |
| Herbal interventions or dietary approaches      | 3 RCTs (238)                        | Low               | Direct     | Inconsistent | Imprecise | None           | Three studies contained reports of changes in symptom scores. <sup>15,27,61</sup> In 1 good-quality RCT, researchers demonstrated improvement in ADHD RS scores associated with an elimination diet relative to a nonrestricted diet. One good-quality and 1 fair-quality study did not reveal a reduction in ADHD symptoms relative to placebo for either Mernommet syrup or zinc supplementation.                                       |
| Other approaches                                | 3 RCTs (252)                        | Medium            | Direct     | Consistent   | Imprecise | None           | Two fair-quality studies did not reveal a reduction in ADHD symptoms relative to placebo or no intervention for melatonin or the Incredible Years program. <sup>53,56,76</sup> Another fair-quality study did not reveal a reduction in ADHD symptoms associated with acupuncture relative to a waitlist control. <sup>40</sup>                                                                                                           |

CI, confidence interval; MPH, methylphenidate; SMD, standardized mean difference.
